# Supplementary material
Source: PubMed Central journal article supplement (PMC5810545)
Supplement: NIHMS940270-supplement-SI.pdf [file NIHMS940270-supplement-SI.pdf]

*Supporting Information for*

## **Mechanistic Studies on Rhodium-Catalyzed Enantioselective Silylation of Aryl C–H Bonds**

Taegyo Lee and John F. Hartwig\*

Department of Chemistry, University of California, Berkeley, California 94720, United States.

### **Table of Contents**

|                                                                        |     |
|------------------------------------------------------------------------|-----|
| Materials and Methods.....                                             | S2  |
| Observation of the Resting States.....                                 | S3  |
| Synthesis and Characterization of Complex <b>4a</b> .....              | S5  |
| Synthesis and Characterization of Complex <b>5</b> and <b>5'</b> ..... | S10 |
| Examination of the Reactivity of Complex <b>4a</b> .....               | S13 |
| Determination of the Experimental Rate Law.....                        | S14 |
| Determination of the Kinetic Isotope Effect.....                       | S17 |
| Deuterium Labeling Study.....                                          | S18 |
| Computational Studies.....                                             | S19 |
| References.....                                                        | S54 |

## Materials and Methods

All air-sensitive manipulations were assembled in an N<sub>2</sub>-filled glovebox using oven-dried glassware. [Rh(cod)Cl]<sub>2</sub> was prepared according to the standard procedure.<sup>1</sup> [Rh(C<sub>2</sub>H<sub>4</sub>)Cl]<sub>2</sub>, **L1**, and **L2** were purchased from Strem and were used as received. Silanes **2a**, **2a-d**<sub>10</sub>, and **2a-d**<sub>2</sub> were prepared from the hydrosilylation of benzophenone and benzophenone-*d*<sub>10</sub><sup>2</sup> and the dehydrogenative silylation of benzhydrol-*d*<sub>2</sub><sup>3</sup> according to our previous publication.<sup>4</sup> The silane **2b-d**<sub>1</sub> was prepared according to our previous publication.<sup>5</sup> Norbornene (nbe) was purchased from Aldrich and was used as received. Tetrahydrofuran (THF) was degassed by purging with nitrogen and then dried with a solvent purification system containing activated alumina. All other solvents and reagents were used as received.

Reaction temperatures above 23 °C refer to the temperature of an aluminum heating block, which was controlled by an electronic temperature modulator. NMR spectra were recorded on Bruker AVQ-400, AV-500, DRX-500 and AV-600 instruments. <sup>1</sup>H NMR chemical shifts (δ) are reported in ppm relative to the residual solvent signal. <sup>31</sup>P NMR chemical shifts were reported relative to an external H<sub>3</sub>PO<sub>4</sub> (85% aqueous) sample. Elemental analysis was conducted at the Micro Analytical Facility in the College of Chemistry, University of California, Berkeley. Chiral SFC analysis was conducted on a Waters chromatography system.

## Observation of the Resting States

Diethyl(hydrido)silyl ether **2a** (54.1 mg, 0.200 mmol) was treated with norbornene (22.6 mg, 0.240 mmol), and a freshly prepared stock solution of a rhodium precursor ( $[\text{Rh}(\text{C}_2\text{H}_4)\text{Cl}]_2$  or  $[\text{Rh}(\text{cod})\text{Cl}]_2$ , 5  $\mu\text{mol}$ , 2.5 mol %) and **L1** (10  $\mu\text{mol}$ , 5.0 mol %) in THF (0.4 mL) in a 4 mL vial. The solution was transferred to a J-Young NMR tube. The reaction was monitored by  $^{31}\text{P}$  NMR spectroscopy at 50 °C. A higher catalyst loading of 5 mol % (in contrast to 1 mol % used in preparative reactions) was used to facilitate the observation of the resting states.

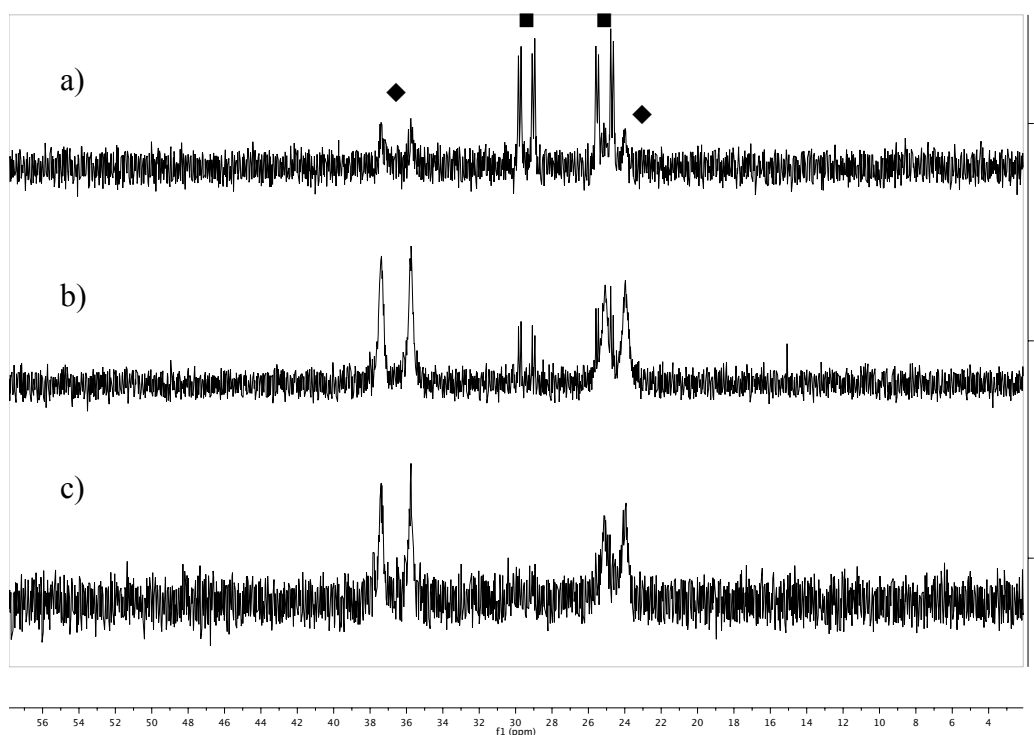

**Figure S1.**  $^{31}\text{P}$  NMR spectra of catalytic reaction of **2a** conducted with 2.5 mol% of  $[\text{Rh}(\text{C}_2\text{H}_4)\text{Cl}]_2$ , 5 mol% of **L1**, and 1.2 equivalent of norbornene at (a) 5 min (~40% conversion), (b) 10 min (~70% conversion) and (c) 15 min (~90% conversion). **4a** (■), **5** (◆).

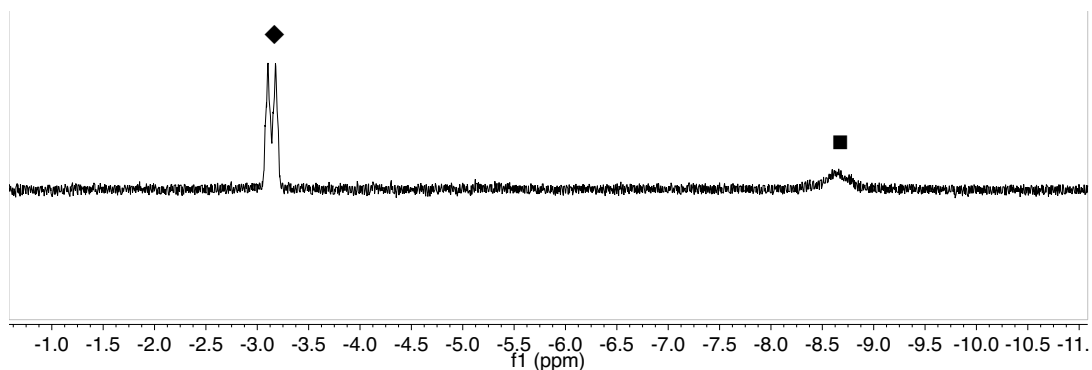

**Figure S2.**  $^1\text{H}$  NMR spectrum of catalytic reaction of **2a** conducted with 2.5 mol% of  $[\text{Rh}(\text{C}_2\text{H}_4)\text{Cl}]_2$ , 5 mol% of **L1**, and 1.2 equivalent of norbornene at 10 min (71% conversion). **4a** (■), **5** (◆).

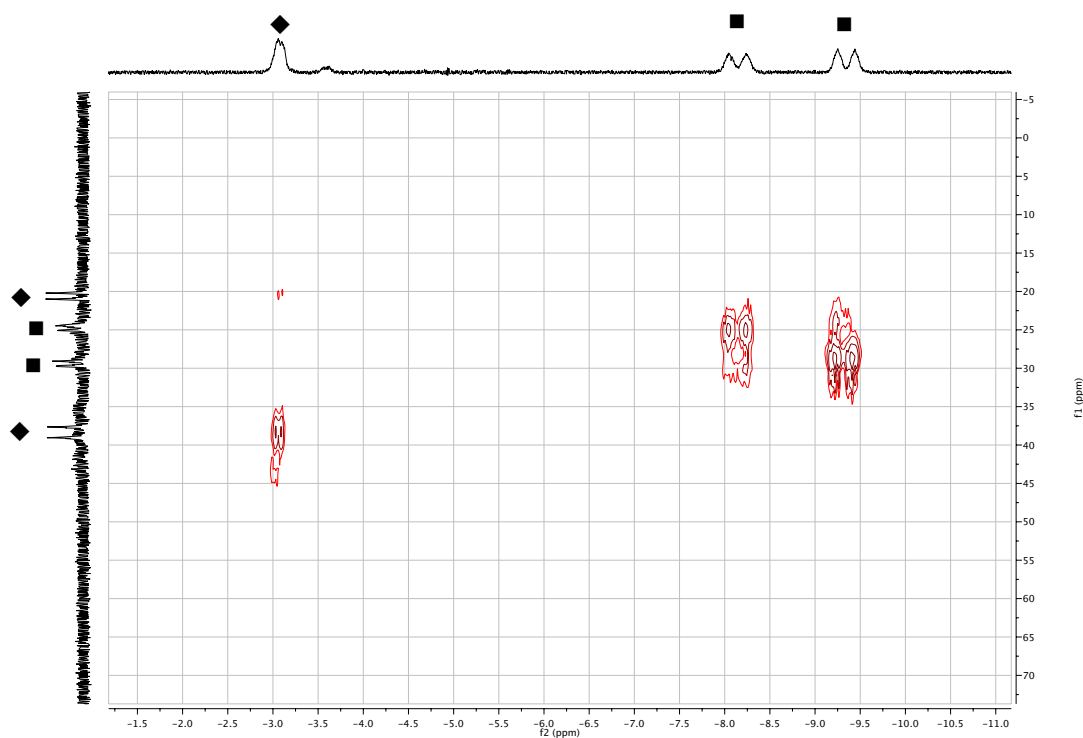

**Figure S3.**  $^{31}\text{P}$ - $^1\text{H}$  HMBC spectrum at  $-80\text{ }^\circ\text{C}$  of silylation reaction of **2a** conducted with 2.5 mol% of  $[\text{Rh}(\text{C}_2\text{H}_4)\text{Cl}]_2$ , 5 mol% of **L1**, and norbornene. **4a** (■), **5** (◆, major isomer labeled).

## Synthesis and Characterization of Complex 4a

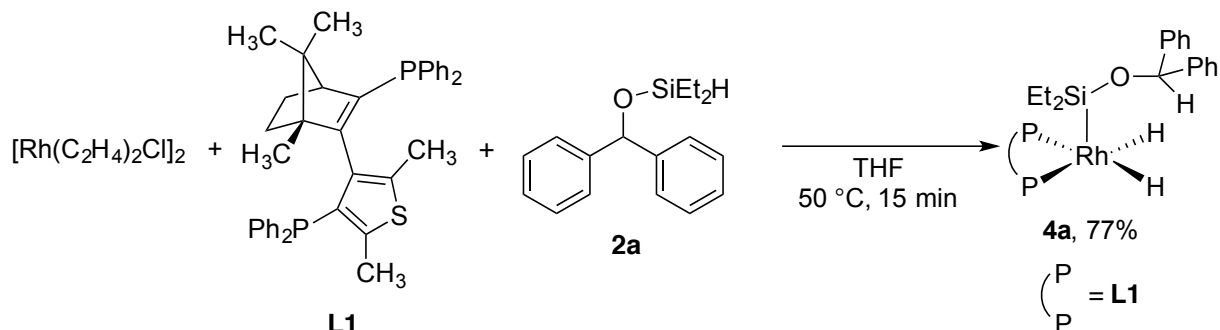

To a solution of  $[\text{Rh}(\text{C}_2\text{H}_4)_2\text{Cl}]_2$  (11.7 mg, 0.0301 mmol) and **L1** (36.9 mg, 0.0600 mmol) in THF (1.2 mL) was added **2a** (163 mg, 0.603 mmol), and the mixture was stirred at 50 °C for 15 min, during which time the mixture turned from dark red to orange. The volatile materials were evaporated, and the residual mixture was washed with pentane to afford complex **4a** as a yellow solid (45.5 mg, 77% yield).  $^1\text{H NMR}$  (600 MHz,  $\text{THF-}d_8$ )  $\delta$  7.90 (t,  $J=7.2$  Hz, 2H), 7.85 (t,  $J=9.3$  Hz 2H), 7.74 (t,  $J=8.1$  Hz, 2H), 7.41 (s, 3H), 7.34 – 6.93 (m, 21H), 6.09 (s, 1H), 2.48 (s, 3H), 2.00 (s, 1H), 1.91 (t,  $J = 9.9$  Hz, 1H), 1.61 (td,  $J = 8.7, 4.4$  Hz, 1H), 1.23 (s, 3H), 1.13 (s, 3H), 0.84 (t,  $J = 10.6$  Hz, 1H), 0.77 (s, 3H), 0.71 – 0.59 (m, 9H), 0.44 – 0.35 (m, 1H), 0.35 – 0.28 (m, 1H), 0.11 (t,  $J = 10.1$  Hz, 1H), 0.08 – 0.01 (m, 1H), -0.07 – -0.17 (m, 1H), -8.21 (br d,  $J = 76.1$  Hz, 1H), -9.16 (br d,  $J = 78.0$  Hz, 1H).  $^{31}\text{P NMR}$  (243 MHz,  $\text{THF-}d_8$ )  $\delta$  29.39 (dd,  $J_{\text{P-Rh}} = 122.6$ ,  $J_{\text{P-P}} = 22.6$  Hz), 25.11 (dd,  $J_{\text{P-Rh}} = 131.2$ ,  $J_{\text{P-P}} = 22.6$  Hz). Anal. Calcd (%) for  $\text{C}_{57}\text{H}_{63}\text{OP}_2\text{RhSSi}$ : C, 69.22, H, 6.42, S 3.24. Found: C, 69.14, H, 6.56, S 3.56.

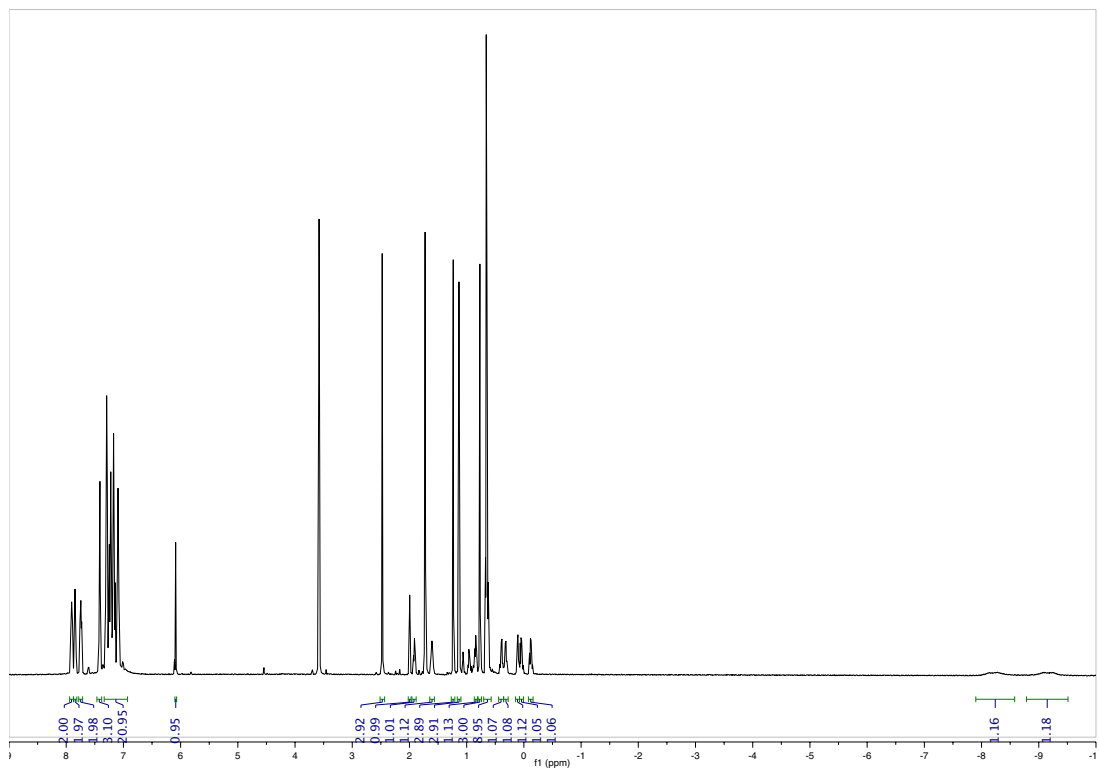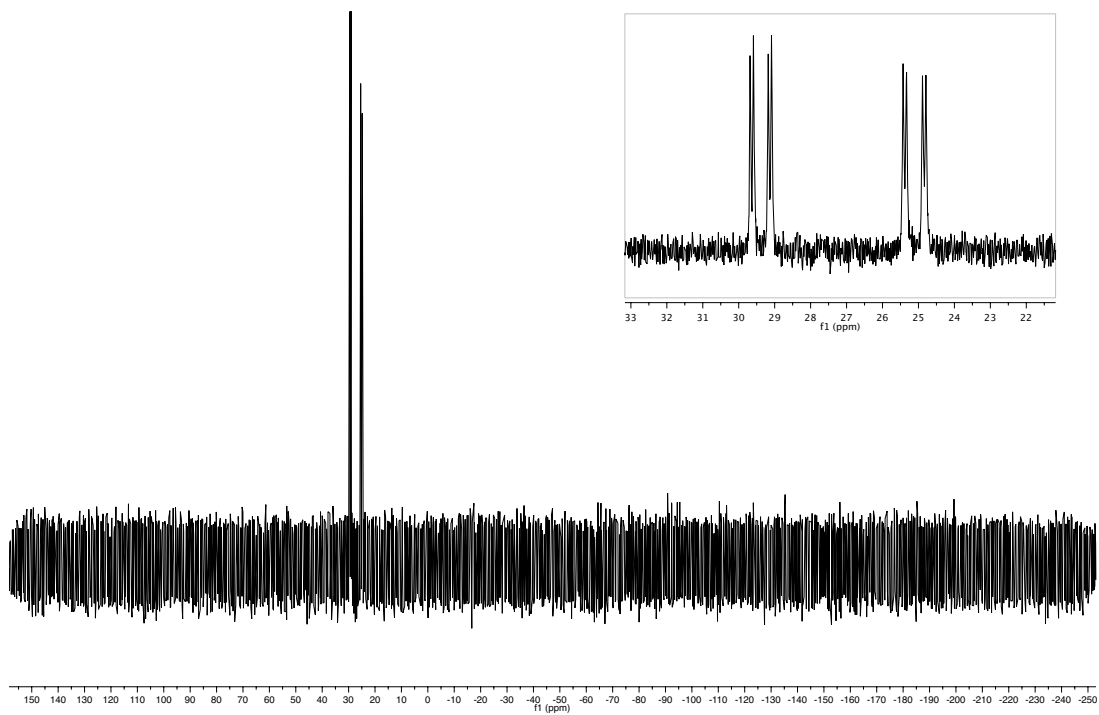

**Figure S4.**  $^1\text{H}$  and  $^{31}\text{P}$  NMR spectra of complex **4a**.

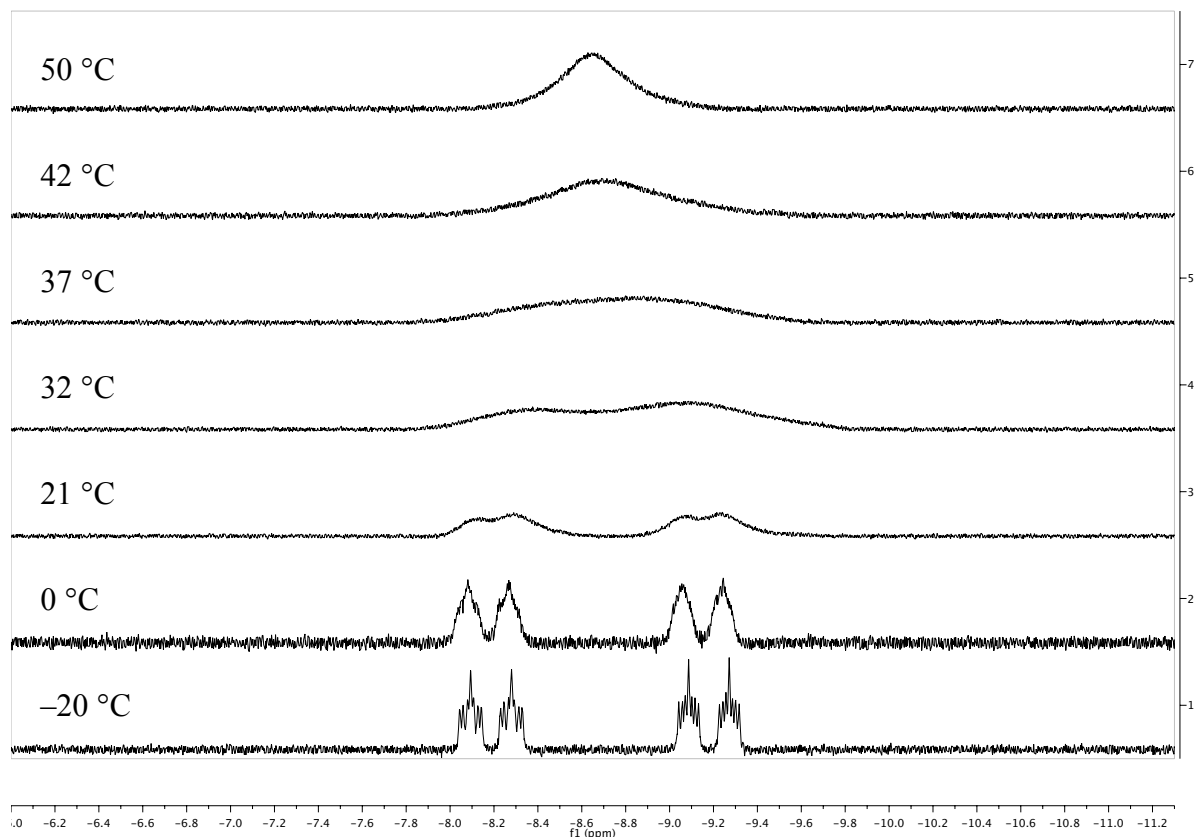

**Figure S5.** Variable-temperature  $^1\text{H}$  spectra of complex **4a** (hydride region) between 50 °C and -20 °C, measured by a 500 MHz NMR spectrometer. Hydride signals at -20 °C:  $^1\text{H}$  NMR (500 MHz,  $\text{THF-}d_8$ )  $\delta$  -8.19 (dddd,  $J = 93.2, 24.9, 17.7, 8.0$  Hz, 1H), -9.18 (dddd,  $J = 92.7, 22.7, 15.0, 8.0$  Hz, 1H).

Single crystals of **4a** suitable for X-ray diffraction were obtained from a dilute solution of **4a** and **2a** in pentane at 25 °C. A yellow rod 0.060 x 0.040 x 0.030 mm in size was mounted on a cryoloop with Paratone oil. Data were collected in a nitrogen gas stream at 100(2) K using phi and omega scans. Crystal-to-detector distance was 40 mm and exposure time was 10 seconds per frame using a scan width of 0.5°. Data collection was 100.0% complete to 25.000° in  $\theta$ . A total of 71036 reflections were collected covering the indices,  $-26 \leq h \leq 26$ ,  $-25 \leq k \leq 27$ ,  $-11 \leq l \leq 11$ . 9051 reflections were found to be symmetry independent, with an

$R_{\text{int}}$  of 0.0342. Indexing and unit cell refinement indicated a primitive, orthorhombic lattice. The space group was found to be  $P 2_1 2_1 2$  (No. 18). The data were integrated using the Bruker SAINT software program and scaled using the SADABS software program. Solution by iterative methods (SHELXT) produced a complete heavy-atom phasing model consistent with the proposed structure. All non-hydrogen atoms were refined anisotropically by full-matrix least-squares (SHELXL-2014). All hydrogen atoms were placed using a riding model. Their positions were constrained relative to their parent atom using the appropriate HFIX command in SHELXL-2014. The absolute stereochemistry was unambiguously determined to be *R* at C16 and *S* at C14, respectively.

Table S1. Crystal data and structure refinement for **4a**.

|                                 |                                                              |                       |
|---------------------------------|--------------------------------------------------------------|-----------------------|
| Empirical formula               | $C_{57}H_{63}OP_2RhSSi$                                      |                       |
| Formula weight                  | 989.07                                                       |                       |
| Temperature                     | 100(2) K                                                     |                       |
| Wavelength                      | 0.71073 Å                                                    |                       |
| Crystal system                  | Orthorhombic                                                 |                       |
| Space group                     | $P 2_1 2_1 2$                                                |                       |
| Unit cell dimensions            | $a = 22.1200(17)$ Å                                          | $\alpha = 90^\circ$ . |
|                                 | $b = 22.8814(16)$ Å                                          | $\beta = 90^\circ$ .  |
|                                 | $c = 9.7523(7)$ Å                                            | $\gamma = 90^\circ$ . |
| Volume                          | $4936.0(6)$ Å <sup>3</sup>                                   |                       |
| Z                               | 4                                                            |                       |
| Density (calculated)            | $1.331$ Mg/m <sup>3</sup>                                    |                       |
| Absorption coefficient          | $0.517$ mm <sup>-1</sup>                                     |                       |
| F(000)                          | 2072                                                         |                       |
| Crystal size                    | $0.060 \times 0.040 \times 0.030$ mm <sup>3</sup>            |                       |
| Theta range for data collection | 1.280 to 25.392°.                                            |                       |
| Index ranges                    | $-26 \leq h \leq 26, -25 \leq k \leq 27, -11 \leq l \leq 11$ |                       |
| Reflections collected           | 71036                                                        |                       |
| Independent reflections         | 9051 [ $R_{\text{int}} = 0.0342$ ]                           |                       |



|                                   |                                             |
|-----------------------------------|---------------------------------------------|
| Completeness to theta = 25.000°   | 100.0 %                                     |
| Absorption correction             | Semi-empirical from equivalents             |
| Max. and min. transmission        | 0.928 and 0.852                             |
| Refinement method                 | Full-matrix least-squares on F <sup>2</sup> |
| Data / restraints / parameters    | 9051 / 0 / 581                              |
| Goodness-of-fit on F <sup>2</sup> | 1.048                                       |
| Final R indices [I>2sigma(I)]     | R1 = 0.0207, wR2 = 0.0457                   |
| R indices (all data)              | R1 = 0.0224, wR2 = 0.0466                   |
| Absolute structure parameter      | -0.022(5)                                   |
| Extinction coefficient            | n/a                                         |
| Largest diff. peak and hole       | 0.474 and -0.274 e.Å <sup>-3</sup>          |

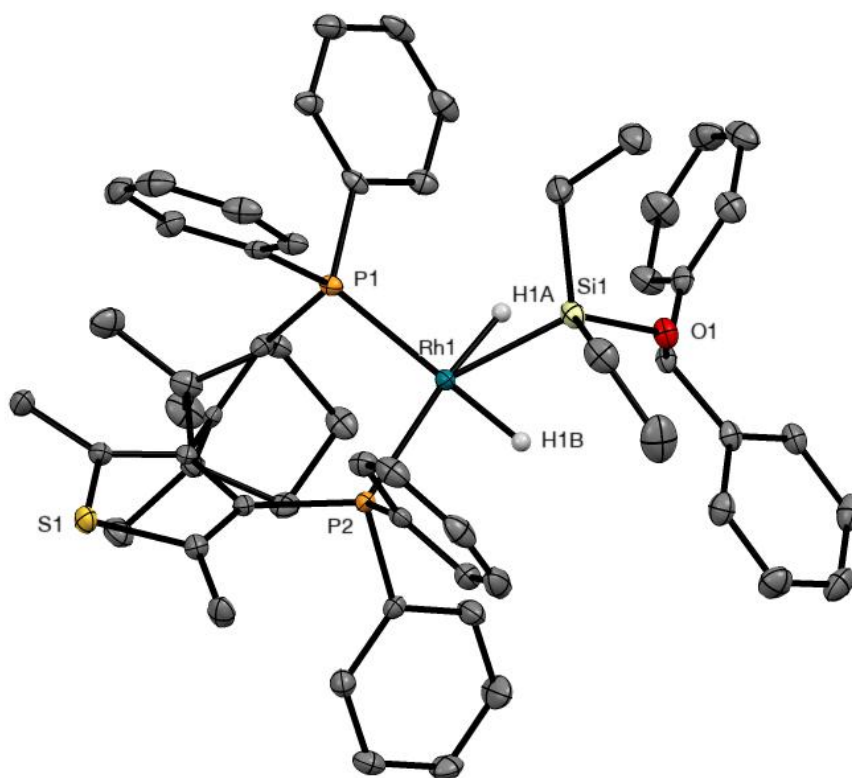

**Figure S6.** ORTEP diagram of **4a** (thermal ellipsoids at the 50% probability level). Hydrogen atoms have been omitted except for the hydrides bound to rhodium. Selected bond lengths (Å): Rh1–P1 = 2.2763(8), Rh1–P2 = 2.3456(8), Rh1–H1A = 1.48(3), Rh1–H1B = 1.49(3), Rh1–Si1 = 2.3126(8). Selected bond angles (°): P1–Rh1–Si1 = 115.52(3), P2–Rh1–Si1 = 129.64(3), H1A–Rh1–Si1 = 53(1), H1B–Rh1–Si1 = 63(1).

## Synthesis and Characterization of Complex **5** and **5'**

To a solution of  $[\text{Rh}(\text{C}_2\text{H}_4)_2\text{Cl}]_2$  (1.9 mg, 0.0050 mmol) and **L1** (6.1 mg, 0.010 mmol, for complex **5**) or **L2** (6.7 mg, 0.010 mmol, for complex **5'**) in THF (0.4 mL) was added norbornene (37.7 mg, 0.400 mmol), and the mixture was stirred at 50 °C for 2 hours. The volatile materials were evaporated to afford a mixture containing complex **5** or **5'** as a brown solid.

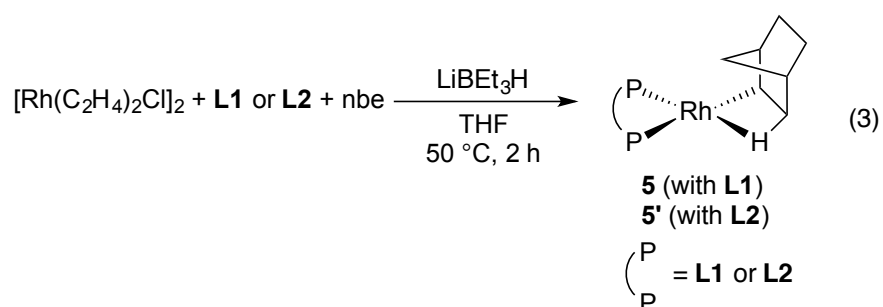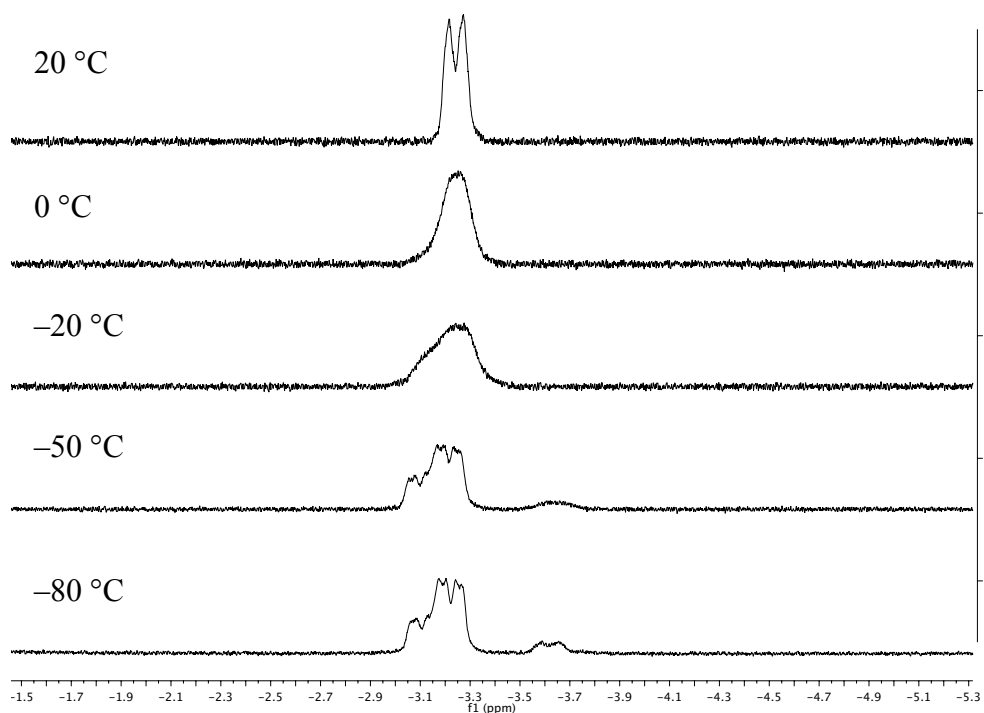

**Figure S7.** Variable-temperature  $^1\text{H}$  spectra of complex **5'** (hydride region) between 19 °C and  $-80$  °C. Three hydride signals corresponding to three isomers were observed at  $-80$  °C:  $\delta$  -3.11 (dd,  $J = 33.7, 13.3$  Hz), -3.22 (dd,  $J = 32.8, 12.9$  Hz), -3.62 (br d,  $J = 35$  Hz).

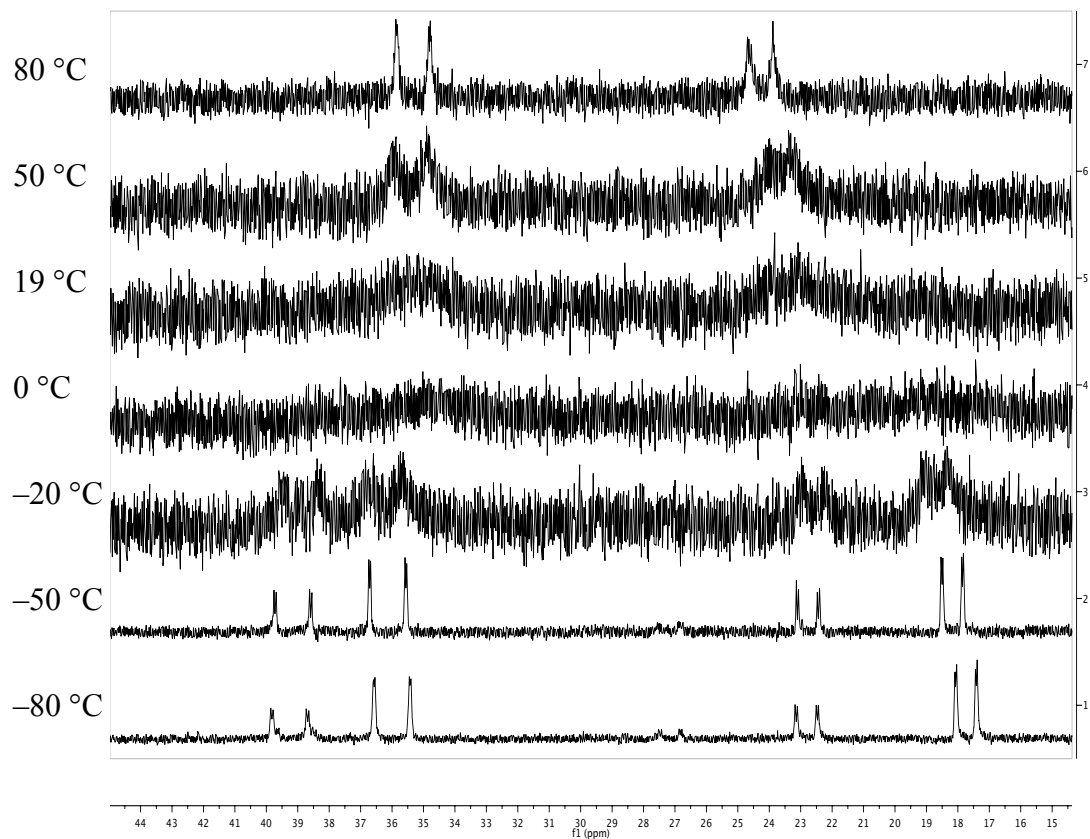

**Figure S8.** Variable-temperature  $^{31}\text{P}$  spectra of complex **5'** between 80 °C and -80 °C.. Three sets of signals corresponding to three isomers were observed at -80 °C.

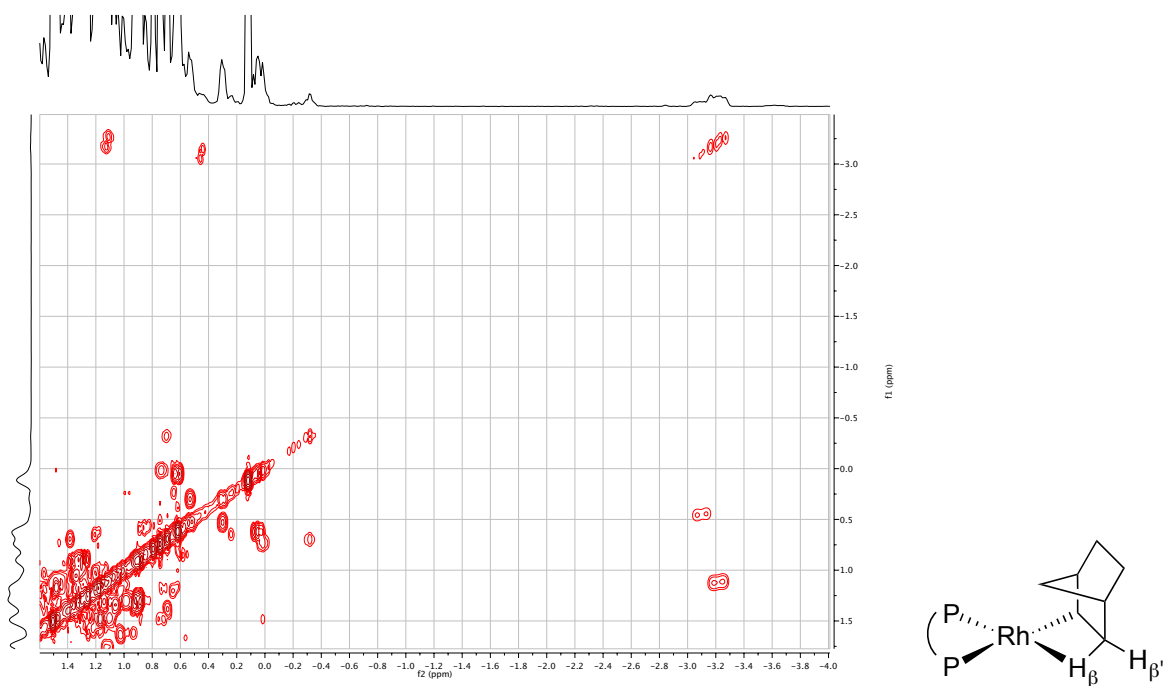

**Figure S9.**  $^{13}\text{C}$ - $^1\text{H}$  COSY spectrum of **5'** at  $-80\text{ }^\circ\text{C}$  showing the correlation between agostic  $\text{H}_\beta$  and non-agostic  $\text{H}_{\beta'}$  resonances.

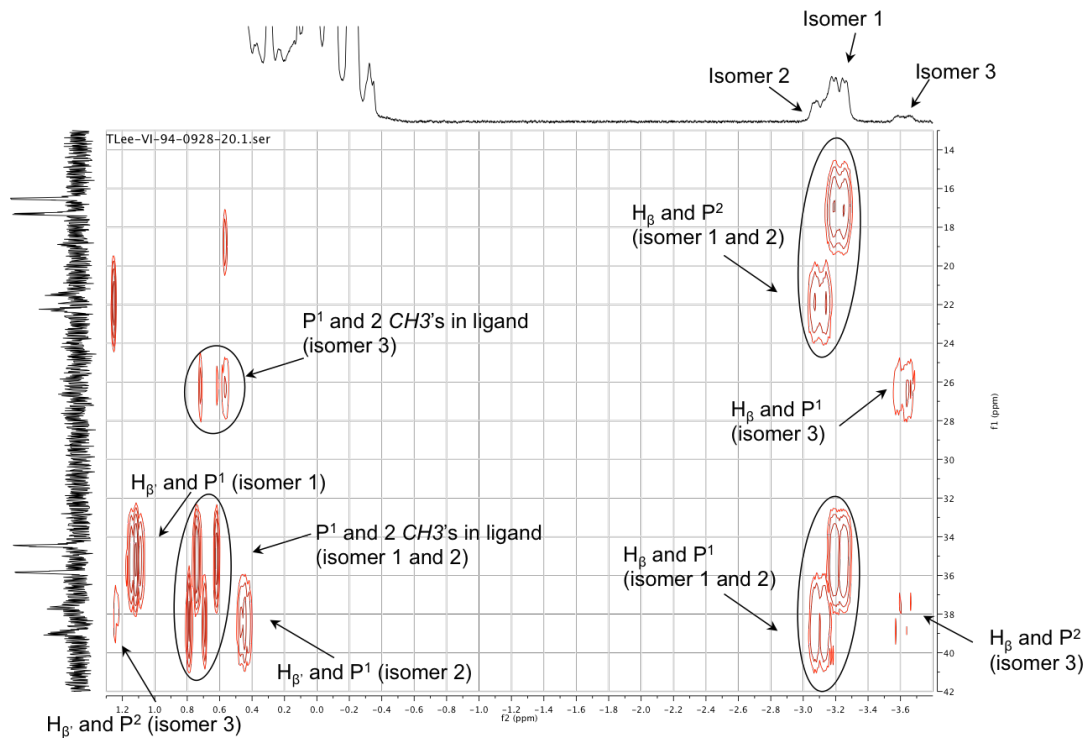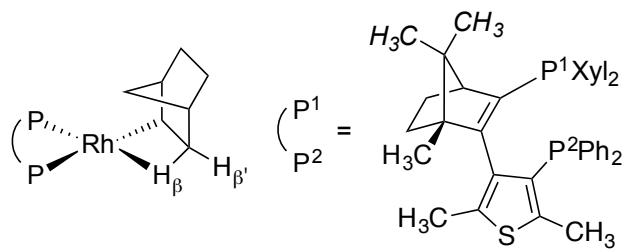

**Figure S10.**  $^{31}\text{P}$ - $^1\text{H}$  HMBC spectrum of **5'** at  $-80\text{ }^\circ\text{C}$  showing the correlation between the agostic  $\text{H}_\beta$  and the ligand resonances.

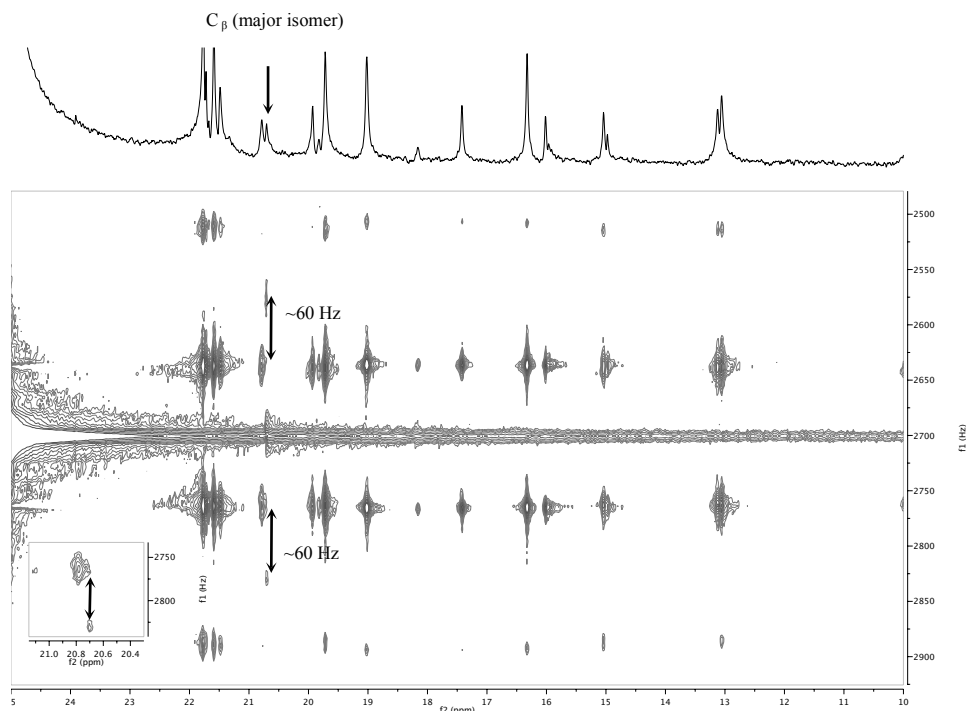

**Figure S11.** 2D  $J$ -resolved  $^{13}\text{C}$  NMR spectrum of **5'** showing  $^1J_{\text{C-H}}$  coupling constant of the agostic C–H bond of the major isomer.

### Examination of the Reactivity of Complex **4**

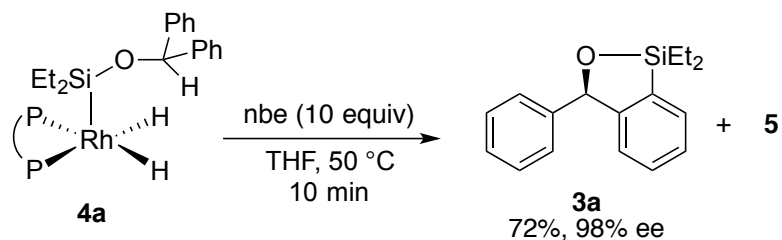

To a J-Young NMR tube was added complex **4a** (9.9 mg, 0.010 mmol), norbornene (9.6 mg, 0.10 mmol) and THF- $d_8$  (0.30 mL). The resulting mixture was heated at 50 °C for 10 min. The  $^1\text{H}$  NMR spectrum of this reaction mixture showed that **4a** was fully consumed and that **3a** and **5** formed in an equal amounts at this time. The yield of **3a** was determined by  $^1\text{H}$  NMR spectroscopy using 1,3,5-trimethoxybenzene as the internal standard added at the end of the reaction, and the enantiomeric excess was determined by chiral SFC analysis.

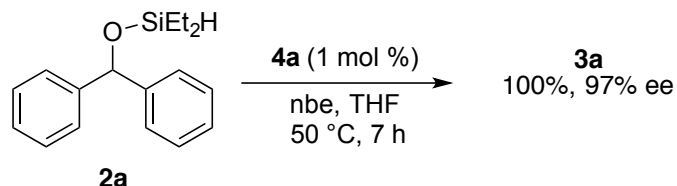

Diethyl(hydrido)silyl ether **2a** (41.1 mg, 0.153 mmol) was treated with norbornene (16.4 mg, 0.174 mmol), and a solution of **4a** (1.5 mg, 1.5  $\mu\text{mol}$ , 1.0 mol %) in THF (0.4 mL) in a 4 mL vial. The resulting mixture was heated at 50  $^\circ\text{C}$  for 7 hours. The formation of **3a** was monitored by GC analysis with dodecane as the internal standard. The enantiomeric excess was determined by chiral SFC analysis.

#### Determination of the Experimental Rate Law

Silylation of **2a** was conducted in THF with a total volume of 300  $\mu\text{L}$  by using the combination of  $[\text{Rh}(\text{cod})\text{Cl}]_2$  and **L1** (Rh:L ratio = 1:1.25) as the catalyst. The concentrations of each reagent under the standard conditions for the catalytic silylation are: 0.33 M **2a**, 0.40 M norbornene, and 3.3 mM catalyst. To determine the rate dependence on one reagent, the concentration of that reagent was varied while the concentration of other reagents and the total volume (300  $\mu\text{L}$ ) were held constant. The concentration of **2a** was varied between 0.10 and 1.0 M. The concentration of norbornene was varied between 0 and 1.5 M. The concentration of the catalyst was varied between 0.20 and 6.7 mM. The rate law of the reaction was determined by the method of initial rates at 50  $^\circ\text{C}$  monitored by GC analysis with dodecane as the internal standard.

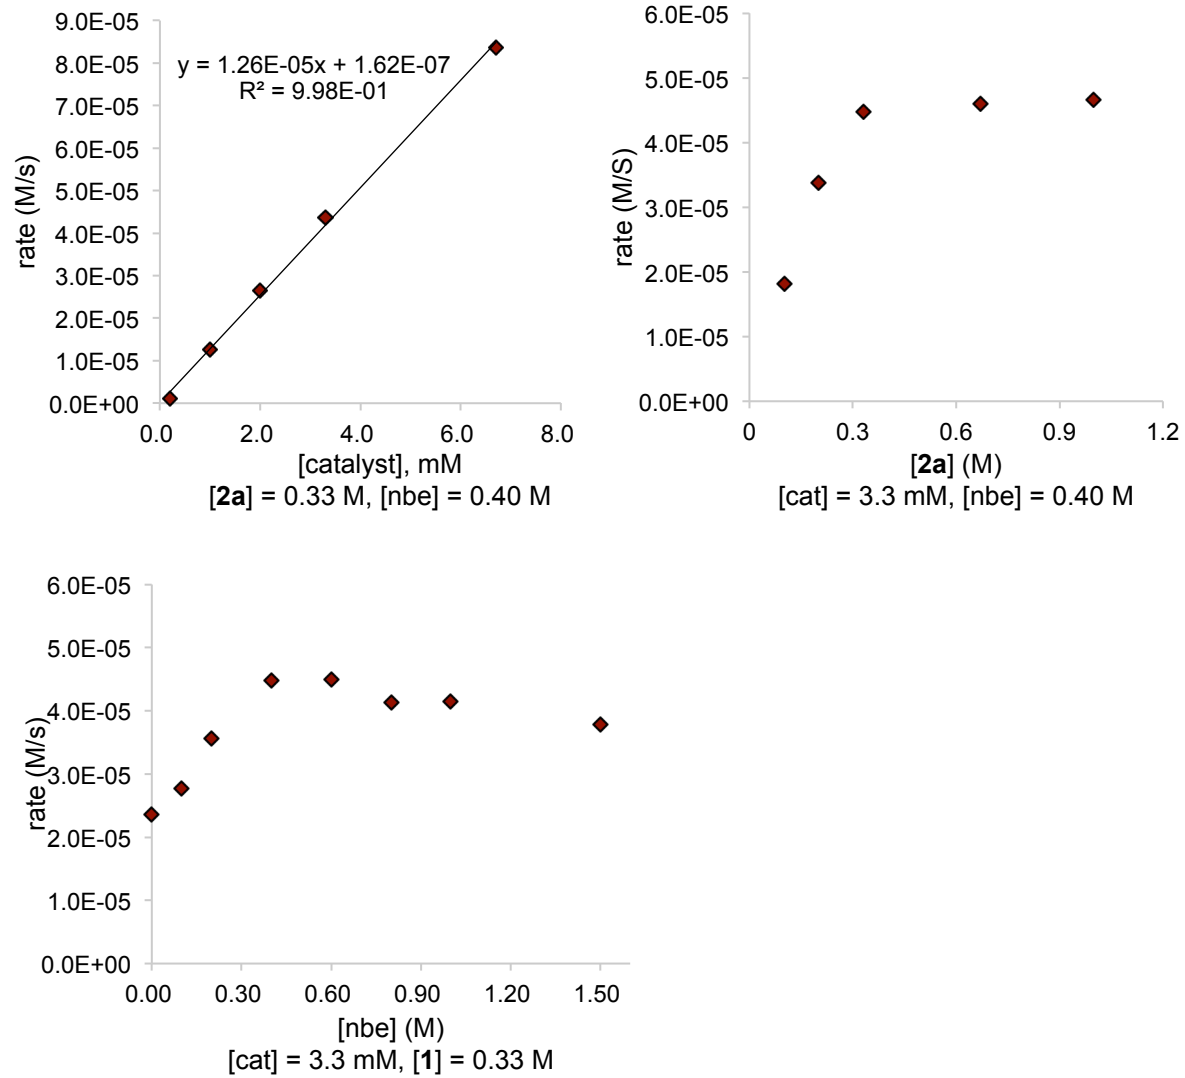

**Figure S12.** Determination of the rate law for the silylation of **2a**.

Additional sets of data points were obtained to illustrate the saturation of the rate at high  $[2a]$  and  $[nbe]$ . The rate dependence on  $[2a]$  at  $[nbe] = 0.20$  M and on  $[nbe]$  at  $[2a] = 0.20$  M were measured.

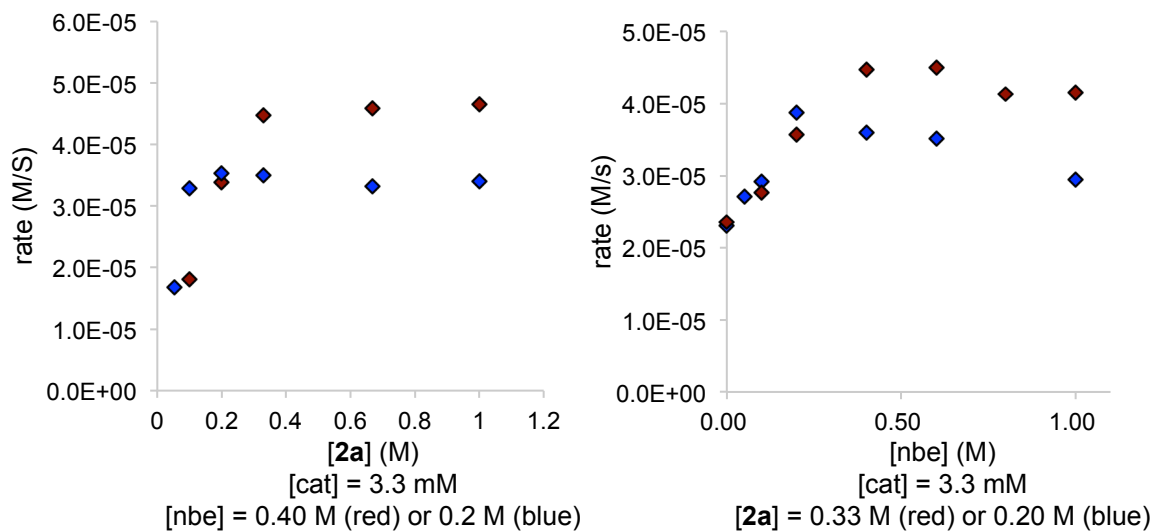

**Figure S13.** Determination of the rate law for the silylation of **2a** illustrating the saturation of the rate at high  $[2a]$  at two concentrations of  $nbe$ , and the saturation of the rate at high  $[nbe]$  at two concentrations of **2a**.

The rate dependence on  $[2a]$  at  $[nbe] = 0$  M was measured.

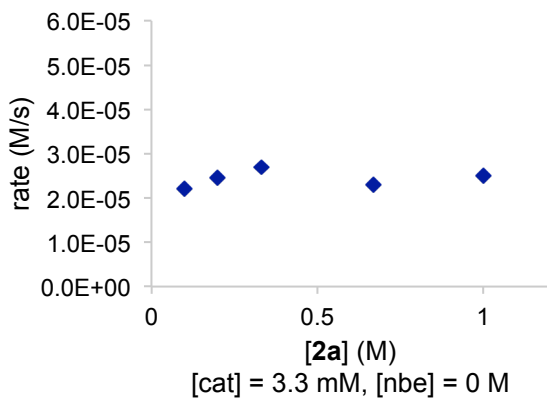

**Figure S14.** Determination of the rate law for the silylation of **2a**  $[2a]$  at  $[nbe] = 0$  M



## Determination of the Kinetic Isotope Effect

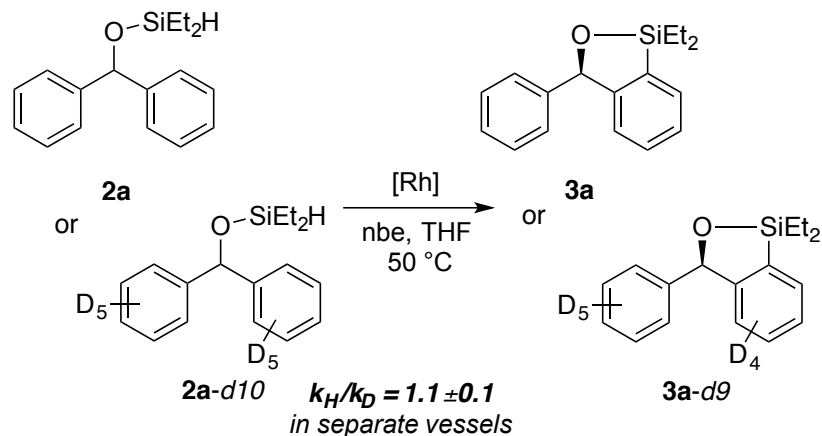

Silylation of **2a-d<sub>10</sub>** was conducted in THF with a total volume of 300  $\mu\text{L}$  under the standard conditions. The concentrations of each reagent under the standard conditions were 0.33 M **2a-d<sub>10</sub>**, 0.40 M norbornene and 3.3 mM catalyst. The initial rate of the reaction at 50  $^\circ\text{C}$  was determined by GC analysis with dodecane as the internal standard. From the initial rates for the silylation of **2a** and **2a-d<sub>10</sub>**, the kinetic isotope effect was determined to be  $k_{\text{H}}/k_{\text{D}} = 1.1 \pm 0.1$  (average of two experiments).

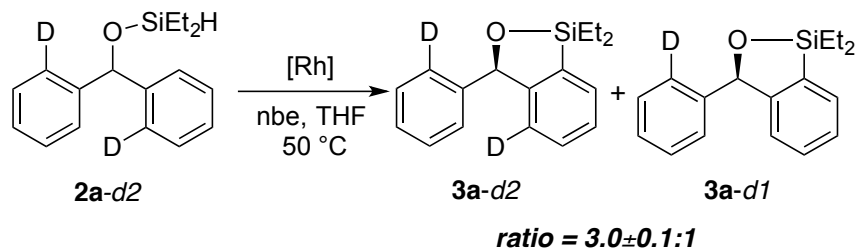

Diethyl(hydrido)silyl ether **2a-d<sub>2</sub>** (27.2 mg, 0.100 mmol) was treated with norbornene (11.3 mg, 0.120 mmol), and a solution of  $[\text{Rh}(\text{cod})\text{Cl}]_2$  (1.0  $\mu\text{mol}$ , 1.0 mol %) and **L2** (2.5  $\mu\text{mol}$ , 2.5 mol %) in THF (0.4 mL) in a 4 mL vial. The resulting mixture was heated at 50  $^\circ\text{C}$  for 24

h. The ratio of **3a-d<sub>2</sub>** and **3a-d<sub>1</sub>** was determined to be 3.0±0.1 : 1 by <sup>1</sup>H NMR analysis (average of two experiments).

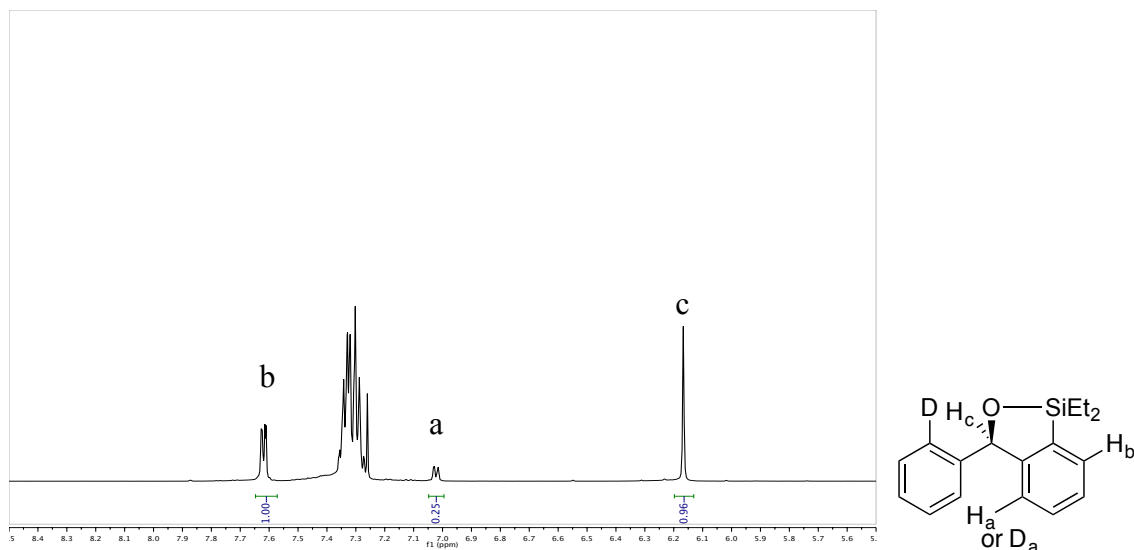

**Figure S15.** <sup>1</sup>H spectrum of the mixture of **3a-d<sub>2</sub>** and **3a-d<sub>1</sub>**.

### Deuterium Labeling Study

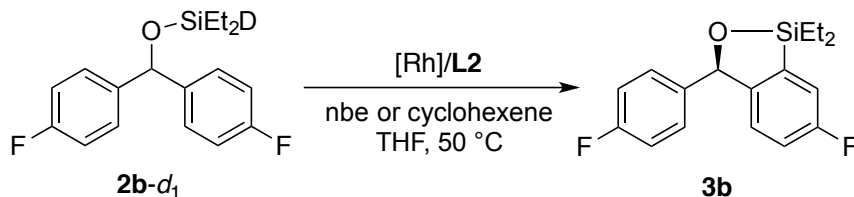

To a J-Young NMR tube was added diethyl(hydrido)silyl ether **2b-d<sub>1</sub>** (30.7 mg, 0.100 mmol), norbornene (11.3 mg, 0.120 mmol) or cyclohexene (12 μL, 0.12 mmol), and a solution of [Rh(cod)Cl]<sub>2</sub> (2.0 μmol, 2.0 mol %) and **L2** (5.0 μmol, 5.0 mol %) in THF (0.4 mL) and THF-*d*<sub>8</sub> (2 μL, standard) in a 4 mL vial. The resulting mixture was heated at 50 °C. The incorporation of deuterium was determined by <sup>2</sup>H NMR analysis.

## Computational Studies

All DFT calculations were performed with the Gaussian 09 software package.<sup>6</sup> Geometries for intermediates and transition states were optimized with the lanl2dz basis set<sup>7,8</sup> for rhodium and the 6-31G(d,p) basis set<sup>9-11</sup> for all other atoms with the B3LYP functional.<sup>12,13</sup> Frequency calculations were conducted on these structures at the same level of theory (at 323 K) to obtain thermodynamic energy corrections and to ensure that all transition states had only one imaginary frequency and all ground states had only positive frequencies. Single-point energy calculations were conducted with the lanl2tz basis set<sup>8,14</sup> for rhodium and the 6-311++G\*\* basis set<sup>15</sup> for all other atoms with the M06 functional.<sup>16</sup> A solvent correction (THF, SMD)<sup>17</sup> was included for the single-point energy calculations.

Multiple isomers can be envisioned for each structure. For example, **9a<sub>R</sub>**, a five-coordinate rhodium complex with a non-C<sub>2</sub> symmetric bisphosphine ligand **L1**, can have two diastereomers based on whether phosphorus (P1) of **L1** is trans or cis to the hydride (See Figure 2 to see which phosphorus is P1), and each diastereomer has at least two rotamers based on how the backbone is oriented. At the beginning of the study, we focused on **9a<sub>R</sub>** and **9a<sub>S</sub>**, and we calculated eight structures for each. We found that the structures that resembled the experimental solid-state structure of **4a** were lowest in the energy among the calculated structures. Because of this similarity between the computational and experimental data, we focused on the structures similar to the experimental solid-state structure of **4a** for other intermediates and transition states.

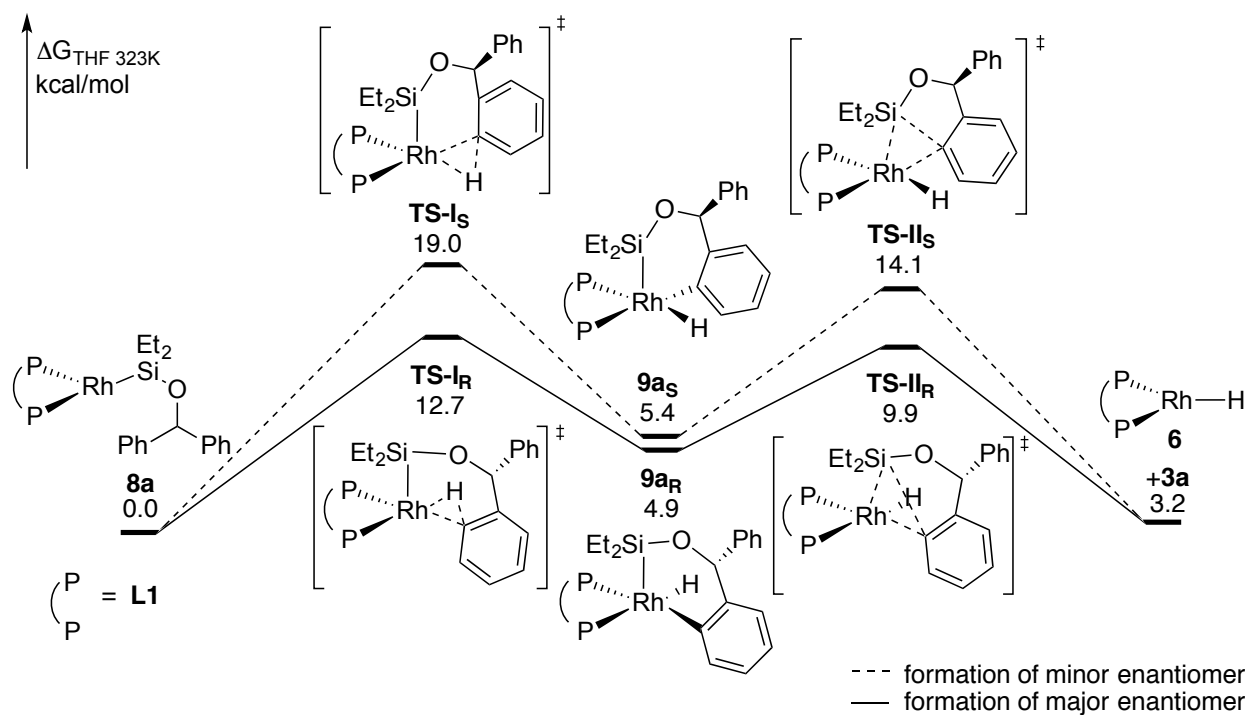

**Figure S16.** Computed pathways for the C–H oxidative addition and C–Si reductive elimination.

#### *Calculation of Theoretical intramolecular KIE*

The intramolecular KIE was calculated by DFT using the following assumptions: 1) only the C–H/D oxidative addition and C–Si reductive elimination steps described in the Figure S13 affect the ratio between C–D and C–H silylation products, 2) the pathway that forms the minor enantiomer is negligible, and 3) the concentration of intermediate **IIa** can be treated with the steady-state approximation. Based on these assumptions, the comparison of the rates of reactions in equation 1 and 2 provides the intramolecular KIE.

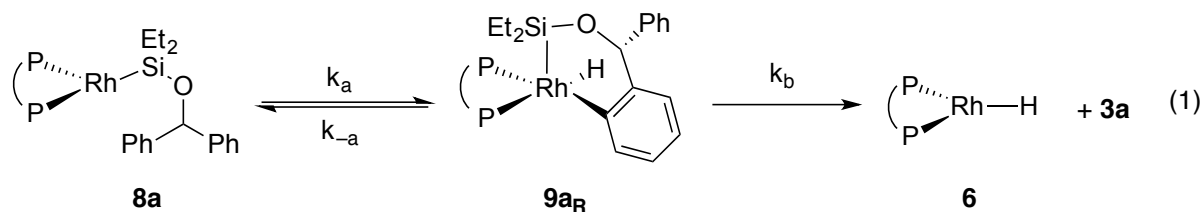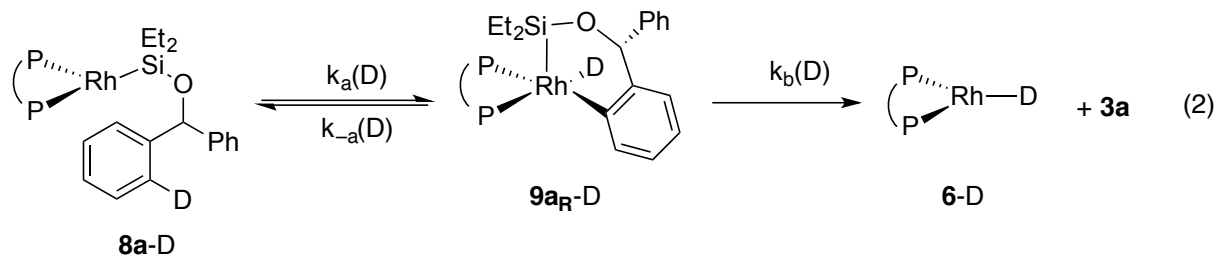

From equation 1,

$$\frac{d[9a_R]}{dt} = k_a[8a] - k_{-a}[9a_R] - k_b[9a_R] = 0$$

$$[9a_R] = \frac{k_a[8a]}{k_{-a} + k_b}$$

From equation 2,

$$\frac{d[9a_{R-D}]}{dt} = k_a(D)[8a-D] - k_{-a}(D)[9a_{R-D}] - k_b(D)[9a_{R-D}] = 0$$

$$[9a_{R-D}] = \frac{k_a(D)[8a-D]}{k_{-a}(D) + k_b(D)}$$

Thus,

$$\text{intramolecular KIE} = \frac{\text{rate of reaction in Eq. 1}}{\text{rate of reaction in Eq. 2}} = \frac{k_b[9a_R]}{k_b(D)[9a_{R-D}]} = \frac{\frac{k_b k_a}{k_{-a} + k_b}}{\frac{k_b(D) k_a(D)}{k_{-a}(D) + k_b(D)}}$$

Microscopic rate constants  $k_a$ ,  $k_{-a}$ , and  $k_b$  were calculated by using the Eyring equation:

$$k_a = 1.59 \times 10^4 \text{ s}^{-1}$$

$$k_{-a} = 3.14 \times 10^7 \text{ s}^{-1}$$

$$k_b = 2.57 \times 10^9 \text{ s}^{-1}$$

$k_a(\text{D})$ ,  $k_{-a}(\text{D})$ , and  $k_b(\text{D})$  were calculated by dividing each microscopic rate constant  $k_a$ ,  $k_{-a}$ , and  $k_b$  by its corresponding KIE. The KIE's for each step were calculated from the zero-point energy difference in the reactants ( $\Delta\text{ZPE}_{\text{reactant}}$ ) and the zero-point energy difference in the transition state ( $\Delta\text{ZPE}_{\text{TS}}$ ).  $\Delta\text{ZPE}$  is the difference of the zero-point energy between the protiated structure and the deuterated structure. The expression for the microscopic KIE's is:

$$\text{KIE} = e^{\frac{\Delta\text{ZPE}_{\text{reactant}} - \Delta\text{ZPE}_{\text{TS}}}{RT}}$$

Zero-point energies for deuterated structures were determined from frequency calculations. The corresponding hydrogen atoms were substituted with deuterium in optimized structures of **8a**, **TS-I<sub>R</sub>**, **9a<sub>R</sub>**, and **TS-II<sub>R</sub>** in these frequency calculations. The microscopic KIE's are:

$$\text{KIE}_a = 4.21$$

$$\text{KIE}_{-a} = 1.39$$

$$\text{KIE}_b = 0.962$$

From these values, the theoretical intramolecular KIE was calculated to be 4.20.

#### *Calculation with the M06 functional.*

We optimized the geometry of the structures by using the M06 functional to ensure the consistency of results from different functionals. The computational details are identical as described above (S19) except the use of the M06 functional for geometry optimization. We were unable to calculate **TS-II<sub>R</sub>** and **TS-II<sub>S</sub>** in this set of calculation.

Comparison of the energies from these calculations with M06 to those with the B3LYP functionals suggested that the discrepancy between the two functionals is not significant

enough to affect the conclusion in our study. Both calculations suggest that **TS-I<sub>S</sub>** is 6-7 kcal/mol higher than **TS-I<sub>R</sub>** (Figure S16–17). Differences of the lengths of the bonds that break and form during **TS-I<sub>S</sub>** and **TS-I<sub>R</sub>** between the two functionals are within 0.05 Å (Figure S18).

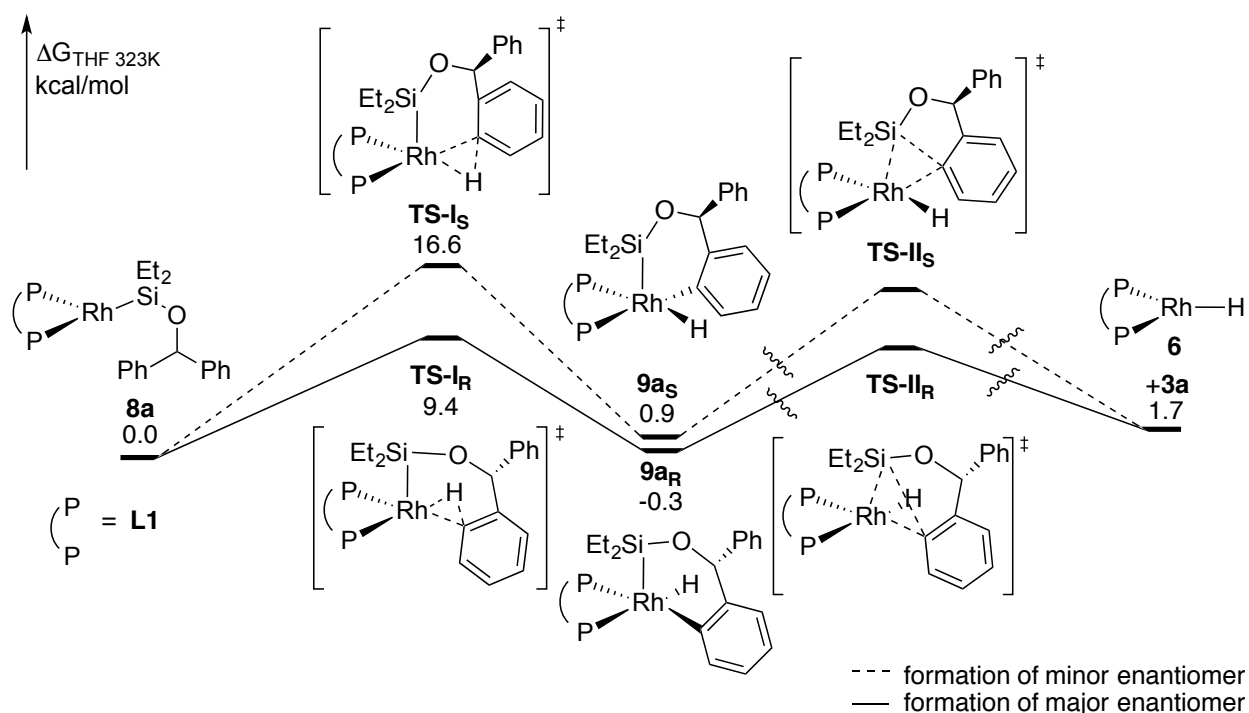

**Figure S17.** Computed pathways for the C–H oxidative addition and C–Si reductive elimination (M06 functional).

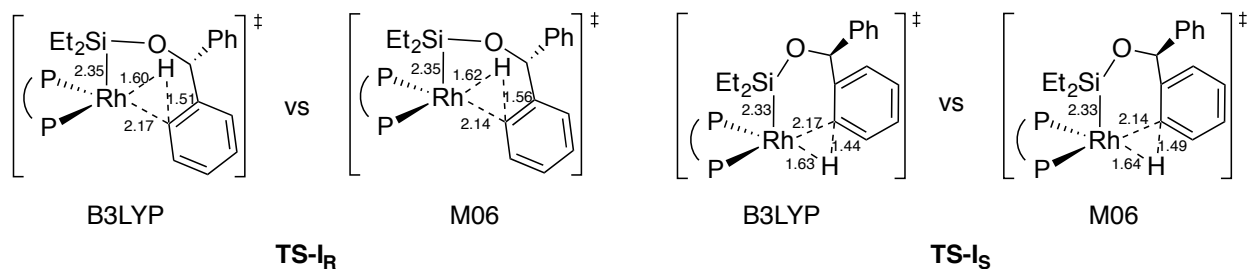

**Figure S18.** Comparison of **TS-I<sub>R</sub>** and **TS-I<sub>S</sub>** computed with the B3LYP and M06 functionals (All distances are in Å.)

## Cartesian Coordinates of Computed Structures

All distances in the figures below are in Å.

Structures computed with the B3LYP functional:

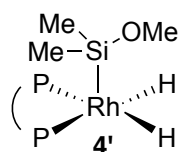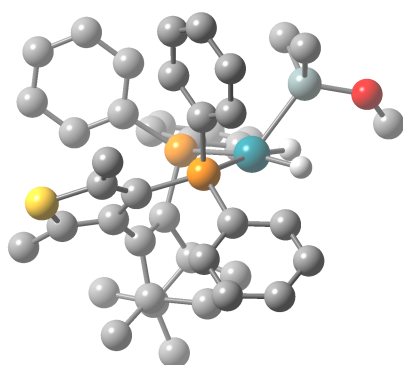

G=-3222.880283

ZPE=-3222.780754

|    |             |             |             |    |
|----|-------------|-------------|-------------|----|
| C  | -1.09667600 | -2.98405100 | -1.75583600 | C  |
| C  | -0.88742600 | -2.14485000 | -0.46298800 | C  |
| C  | -1.43324200 | -0.86413100 | -2.96082900 | C  |
| C  | -0.46794900 | -2.07717300 | -2.87933500 | C  |
| C  | -3.59178900 | -3.38016000 | -0.98738100 | C  |
| C  | -3.12623500 | -3.21482000 | -3.40240400 | C  |
| C  | -0.57221800 | -4.41239200 | -1.78947900 | C  |
| C  | 0.18515500  | -2.43463500 | 0.52771900  | C  |
| C  | 0.11229900  | -3.54132700 | 1.34803000  | C  |
| C  | 2.30662100  | -2.32753300 | 1.57731400  | C  |
| C  | 1.44825300  | -1.70253700 | 0.69112000  | C  |
| C  | -1.01509100 | -4.50537200 | 1.57838700  | C  |
| C  | 3.72224200  | -2.03667500 | 1.99986100  | C  |
| C  | 2.94761100  | -0.62166500 | -1.55137500 | C  |
| C  | 3.29751100  | 0.31527000  | -2.53902400 | C  |
| C  | 4.14421600  | -0.03907700 | -3.58989500 | C  |
| C  | 4.63958100  | -1.34089100 | -3.68693100 | C  |
| C  | 4.28553500  | -2.28461100 | -2.72274500 | C  |
| C  | 3.45012900  | -1.92804300 | -1.66173100 | C  |
| C  | 2.96871700  | 0.75536200  | 1.03083700  | C  |
| C  | 2.48978500  | 1.04754400  | 2.31851800  | C  |
| C  | 3.29073800  | 1.72693600  | 3.23575100  | C  |
| C  | 4.57541000  | 2.14457000  | 2.87612100  | C  |
| C  | 5.05053300  | 1.87408400  | 1.59352500  | C  |
| C  | 4.25466700  | 1.18271300  | 0.67659000  | O  |
| O  | 0.38668200  | 4.77913400  | -1.81241800 | Si |
| Si | 0.33631800  | 3.77560000  | -0.45454600 | P  |
| P  | -1.73027600 | 0.46767300  | 0.42170600  | P  |
| P  | 1.83092400  | -0.09332700 | -0.16030300 | S  |
| S  | 1.56500300  | -3.73790800 | 2.27724200  | Rh |
| Rh | 0.05783500  | 1.48596600  | -0.83051500 | H  |
| H  | -4.29649500 | -0.00491000 | 1.93791800  | H  |
| H  | -6.58907000 | 0.83740500  | 1.63571700  | H  |
| H  | -7.11050300 | 2.42632000  | -0.20554400 | H  |
| H  | -5.29834100 | 3.16313200  | -1.74423400 | H  |
| H  | -2.98773100 | 2.32299800  | -1.43101600 | H  |
| H  | -2.46849300 | -1.97682900 | 2.04413800  | H  |
| H  | -2.40722100 | -2.42639400 | 4.47591800  | H  |
| H  | -1.55931400 | -0.69459200 | 6.04394800  | H  |
| H  | -0.77763300 | 1.49504300  | 5.15822900  | H  |
| C  | -3.47584900 | 1.08784900  | 0.26145100  | C  |
| C  | -4.50591700 | 0.68061500  | 1.12394700  | C  |
| C  | -5.80568900 | 1.16005000  | 0.95540300  | C  |
| C  | -6.09878700 | 2.05157600  | -0.07810200 | C  |
| C  | -5.08280700 | 2.46422300  | -0.94086700 | C  |
| C  | -3.78083300 | 1.99044000  | -0.76867900 | C  |
| C  | -1.65434100 | 0.01171000  | 2.21056500  | C  |
| C  | -2.09700800 | -1.21677100 | 2.72223200  | C  |
| C  | -2.06124200 | -1.46937500 | 4.09471800  | C  |
| C  | -1.58614600 | -0.49650900 | 4.97627100  | C  |
| C  | -1.14599500 | 0.73139500  | 4.47899200  | C  |
| C  | -1.17553200 | 0.98147700  | 3.10576700  | C  |
| C  | -1.74609700 | -1.09584400 | -0.53471900 | C  |
| C  | -2.49428500 | -1.20776300 | -1.86698900 | C  |
| C  | -2.63603600 | -2.75264200 | -2.01661600 | C  |



|   |             |             |             |
|---|-------------|-------------|-------------|
| H | -0.82450300 | 1.93483600  | 2.72243500  |
| H | -3.41865600 | -0.63089800 | -1.93501600 |
| H | -1.90034600 | -0.77650100 | -3.94679000 |
| H | -0.93662100 | 0.09092400  | -2.75126500 |
| H | 0.55730800  | -1.79460200 | -2.63179500 |
| H | -0.42221100 | -2.62641600 | -3.82563100 |
| H | -4.62723800 | -3.12040400 | -1.23446800 |
| H | -3.40631900 | -3.03665400 | 0.03084900  |
| H | -3.52382600 | -4.47416200 | -1.00234500 |
| H | -3.17691400 | -4.30888000 | -3.44246900 |
| H | -2.50074200 | -2.88504700 | -4.23216200 |
| H | -4.13948200 | -2.83850300 | -3.58374100 |
| H | 0.49771300  | -4.44663900 | -1.56073900 |
| H | -0.70808500 | -4.83789700 | -2.78945800 |
| H | -1.08387300 | -5.06787500 | -1.07998100 |
| H | -1.86026800 | -4.27693600 | 0.93062900  |
| H | -1.36640700 | -4.45328200 | 2.61595800  |
| H | -0.71321000 | -5.54180000 | 1.38986500  |
| H | 4.31077200  | -1.63659200 | 1.17335100  |
| H | 4.20806800  | -2.95454100 | 2.34440500  |
| H | 3.76411800  | -1.30733200 | 2.81461600  |
| H | 2.88917700  | 1.31936100  | -2.48817000 |
| H | 4.40499600  | 0.70221000  | -4.33998500 |
| H | 5.28952200  | -1.61899800 | -4.51180100 |
| H | 4.65728100  | -3.30314300 | -2.79308500 |
| H | 3.17985400  | -2.67511900 | -0.92363000 |
| H | 1.49255600  | 0.73295400  | 2.60978700  |
| H | 2.90840900  | 1.93483700  | 4.23142300  |
| H | 5.19663900  | 2.67870200  | 3.58919900  |
| H | 6.04579300  | 2.19711400  | 1.30123700  |
| H | 4.64563200  | 0.97110700  | -0.31284100 |
| H | -0.96053400 | 2.46843500  | -1.53134100 |
| H | 1.07876600  | 2.03220600  | -1.91332800 |
| C | 2.00060000  | 4.18847200  | 0.34274900  |
| H | 2.12735500  | 3.69899200  | 1.31154700  |
| H | 2.83034200  | 3.88786600  | -0.30201200 |
| H | 2.05966400  | 5.27380100  | 0.49054200  |
| C | -1.02313100 | 4.46313400  | 0.68948000  |
| H | -2.02827900 | 4.28657100  | 0.29532900  |
| H | -0.97669900 | 4.01015400  | 1.68596400  |
| H | -0.88560000 | 5.54493300  | 0.81082400  |
| C | -0.55962700 | 4.80204700  | -2.85359900 |
| H | -0.65294000 | 3.81737300  | -3.33527500 |
| H | -1.55779800 | 5.10879800  | -2.50399200 |
| H | -0.23079900 | 5.52658200  | -3.60740500 |

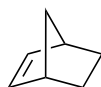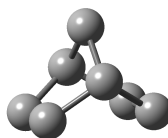

G=-272.461427  
ZPE=-272.429973

|   |             |             |             |
|---|-------------|-------------|-------------|
| C | 1.19201800  | 0.77974600  | -0.51622000 |
| C | -0.08743300 | 1.12855900  | 0.32241700  |
| C | -0.08839900 | -1.12799500 | 0.32360600  |
| C | 1.19107700  | -0.78133700 | -0.51560100 |
| H | 1.14781900  | 1.20551900  | -1.52207900 |
| H | 2.08894000  | 1.17573200  | -0.02801000 |
| H | 1.14698200  | -1.20797900 | -1.52121900 |
| H | 2.08741600  | -1.17775000 | -0.02688600 |
| C | -0.04201200 | 0.00094800  | 1.38059700  |
| H | -0.91339900 | 0.00178600  | 2.04137200  |
| H | 0.87592700  | 0.00096800  | 1.98008300  |
| C | -1.27837900 | 0.67023500  | -0.50861500 |
| H | -1.92009500 | 1.32761200  | -1.08593800 |
| C | -1.27899100 | -0.67005900 | -0.50787600 |
| H | -1.92091000 | -1.32756800 | -1.08481200 |
| H | -0.11904600 | 2.15744400  | 0.68751700  |
| H | -0.12090900 | -2.15634400 | 0.69012500  |

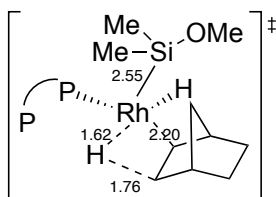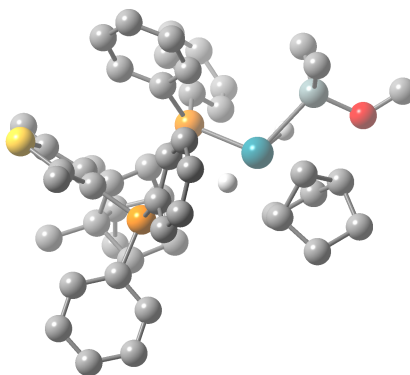

G=-3495.305942  
ZPE=-3495.196150

|    |             |             |             |   |             |             |             |
|----|-------------|-------------|-------------|---|-------------|-------------|-------------|
| Si | -4.56557100 | 0.94635100  | 0.22117500  | P | -1.31950200 | -1.21056300 | 0.24360500  |
| Rh | -2.14373600 | 0.83926600  | -0.56030200 | P | 2.51364400  | 0.98027700  | -0.14626000 |
| H  | -3.64787200 | 0.18643000  | -0.89938200 | S | 3.97122000  | -2.19809200 | 2.50054900  |
| O  | -5.51367600 | 1.80742300  | -0.88107300 | H | -2.07677500 | -3.61739700 | 2.00598100  |
| C  | -2.53811300 | -2.62993500 | 0.13665700  | H | -3.69236700 | -5.43504000 | 1.70386400  |
| C  | -2.67521500 | -3.63752700 | 1.10343600  | H | -5.11763700 | -5.53206000 | -0.33318800 |
| C  | -3.60045900 | -4.67153800 | 0.93610700  | H | -4.91863900 | -3.73887300 | -2.05212600 |
| C  | -4.40195900 | -4.72515000 | -0.20360500 | H | -3.33141300 | -1.88072300 | -1.72285500 |
| C  | -4.28784100 | -3.72213000 | -1.16760000 | H | 0.14760200  | -3.14886300 | 2.08410600  |
| C  | -3.37719500 | -2.68065000 | -0.99035400 | H | 0.65630300  | -3.05436900 | 4.49548300  |
| C  | -0.80510600 | -1.21460300 | 2.01889700  | H | -0.00382500 | -1.06862700 | 5.83539700  |
| C  | -0.14403600 | -2.27656900 | 2.65521700  | H | -1.16749000 | 0.83370000  | 4.72944000  |
| C  | 0.14199500  | -2.22391400 | 4.02003300  | H | -1.65601800 | 0.73588100  | 2.28954200  |
| C  | -0.22665400 | -1.10681200 | 4.77281900  | H | -1.30036800 | -2.47128500 | -2.44104800 |
| C  | -0.87844000 | -0.04052500 | 4.15258500  | H | 0.06294200  | -1.21142600 | -4.12210200 |
| C  | -1.16097700 | -0.09409400 | 2.78532700  | H | 0.06756500  | -0.15689600 | -2.70692100 |
| C  | 0.06741400  | -1.92122100 | -0.75734800 | H | 2.42850900  | -0.54227500 | -2.47779000 |
| C  | -0.25130200 | -2.27778900 | -2.22057000 | H | 2.38844800  | -1.62112400 | -3.85914300 |
| C  | 0.71719200  | -3.46744700 | -2.47793500 | H | -0.51642500 | -5.21639800 | -2.11947100 |
| C  | 1.95390900  | -2.64147100 | -1.95460300 | H | 0.11737700  | -4.52240900 | -0.63517400 |
| C  | 1.40441500  | -2.10864300 | -0.59614700 | H | 1.17916000  | -5.46040300 | -1.70592300 |
| C  | 0.37882900  | -1.13531500 | -3.07667500 | H | 1.53703100  | -4.71716500 | -4.06426700 |
| C  | 1.89879500  | -1.39316700 | -2.90647700 | H | 1.10470200  | -3.10741600 | -4.63969400 |
| C  | 0.36065400  | -4.73155000 | -1.67692100 | H | -0.15710100 | -4.28768200 | -4.29040400 |
| C  | 0.81224800  | -3.90254000 | -3.95357600 | H | 4.09267600  | -2.65417200 | -1.56850500 |
| C  | 3.31325800  | -3.32706600 | -1.93927400 | H | 3.59445500  | -3.62813000 | -2.95431200 |
| C  | 2.33846700  | -1.82363100 | 0.53435000  | H | 3.32354700  | -4.22345200 | -1.31209500 |
| C  | 2.82680200  | -2.82310200 | 1.34895500  | H | 1.76890600  | -4.54037900 | 0.62475800  |
| C  | 3.84584300  | -0.57875700 | 1.87587600  | H | 2.10581300  | -4.59301500 | 2.35926900  |
| C  | 2.94337100  | -0.52360000 | 0.83231400  | H | 3.39895800  | -4.90089100 | 1.20181100  |
| C  | 2.50771700  | -4.28929500 | 1.38480500  | H | 5.05956500  | 1.19938100  | 1.78104000  |
| C  | 4.67998400  | 0.49281600  | 2.52127000  | H | 5.53642600  | 0.05617200  | 3.04361700  |
| C  | 4.02619400  | 1.28643800  | -1.17836300 | H | 4.09720400  | 1.06764600  | 3.24899800  |
| C  | 3.91809200  | 2.26143400  | -2.18745400 | H | 2.98725100  | 2.81150300  | -2.30350400 |
| C  | 4.98397500  | 2.52849000  | -3.04663800 | H | 4.88063100  | 3.29128000  | -3.81344900 |
| C  | 6.17280900  | 1.80438000  | -2.93267000 | H | 7.00016100  | 2.00232600  | -3.60815000 |
| C  | 6.28523300  | 0.81614000  | -1.95406300 | H | 7.20278300  | 0.24081500  | -1.86463100 |
| C  | 5.22326600  | 0.56057300  | -1.08308800 | H | 5.32336000  | -0.21424700 | -0.33001600 |
| C  | 2.57240100  | 2.35226900  | 1.10340600  | H | 1.10562000  | 1.37689200  | 2.35887400  |
| C  | 1.70868200  | 2.26714200  | 2.21012800  | H | 0.95958400  | 3.21421000  | 3.98740900  |
| C  | 1.62478500  | 3.30891700  | 3.13325100  | H | 2.31547100  | 5.28231800  | 3.67655700  |
| C  | 2.38513500  | 4.46846700  | 2.96051800  | H | 3.83176800  | 5.46568300  | 1.71210700  |
| C  | 3.23281400  | 4.57056800  | 1.85771300  | H | 4.00498600  | 3.61952100  | 0.09506700  |
| C  | 3.32829200  | 3.52297500  | 0.93784800  | C | -6.80362000 | 2.30255700  | -0.57936300 |
|    |             |             |             | H | -6.78669900 | 3.03129300  | 0.24421700  |
|    |             |             |             | H | -7.19527500 | 2.80790600  | -1.46839900 |
|    |             |             |             | H | -7.50400000 | 1.49882500  | -0.31017500 |
|    |             |             |             | C | -4.33887100 | 2.00188700  | 1.78570900  |

|   |             |             |             |    |             |             |             |
|---|-------------|-------------|-------------|----|-------------|-------------|-------------|
| H | -3.78287100 | 2.92381400  | 1.61168600  | C  | 0.35324100  | 3.46568000  | -0.14881500 |
| H | -5.33065900 | 2.26834000  | 2.17576400  | C  | 0.25561300  | 4.48886000  | 0.80528700  |
| H | -3.82990500 | 1.42937200  | 2.56646700  | C  | 0.52232000  | 5.81638400  | 0.45919200  |
| C | -5.55069400 | -0.56460200 | 0.80557500  | C  | 0.88403600  | 6.14571000  | -0.84660500 |
| H | -6.44298400 | -0.25817200 | 1.36467500  | C  | 0.98571900  | 5.13656400  | -1.80703500 |
| H | -5.87242000 | -1.18963100 | -0.03275200 | C  | 0.73414500  | 3.81019800  | -1.45772100 |
| H | -4.94840700 | -1.19464300 | 1.46863300  | C  | -0.16002100 | 1.69043800  | 2.07291900  |
| C | -2.53884300 | 2.73024900  | -1.62221700 | C  | -1.32942800 | 2.12554000  | 2.71394800  |
| C | -2.79975600 | 4.03865300  | -0.87112400 | C  | -1.40846100 | 2.15639600  | 4.10745100  |
| H | -3.16694300 | 2.46182000  | -2.46651700 | C  | -0.31679400 | 1.75664600  | 4.88135300  |
| C | -1.12688100 | 2.57129500  | -1.63274600 | C  | 0.85462000  | 1.32776500  | 4.25488500  |
| C | -2.33633400 | 5.17401600  | -1.83869300 | C  | 0.93087400  | 1.29277700  | 2.86090600  |
| C | -1.63935700 | 4.05466300  | 0.14933200  | C  | -1.63738100 | 1.39278700  | -0.44661200 |
| H | -3.81228300 | 4.16594600  | -0.48558800 | C  | -2.12964200 | 2.05376900  | -1.73636200 |
| C | -0.54955700 | 3.78373600  | -0.90542400 | C  | -3.67530900 | 1.90670600  | -1.60260300 |
| H | -0.58560500 | 1.27974000  | -0.56501800 | C  | -3.56660000 | 0.36648100  | -1.28971800 |
| H | -0.58699300 | 2.14965300  | -2.47641700 | C  | -2.48556900 | 0.37033700  | -0.16984600 |
| C | -0.78549200 | 4.98134300  | -1.88172600 | C  | -1.79252600 | 1.02525200  | -2.86542700 |
| H | -2.80394100 | 5.08954900  | -2.82438200 | C  | -2.77489400 | -0.13581600 | -2.55497400 |
| H | -2.60047400 | 6.15731300  | -1.43305100 | C  | -4.28038000 | 2.77169900  | -0.48405700 |
| H | -1.69961300 | 3.25794300  | 0.89491400  | C  | -4.45692600 | 2.24979500  | -2.88576600 |
| H | -1.51717900 | 5.02237500  | 0.64845500  | C  | -4.85474600 | -0.40969200 | -1.05539100 |
| H | 0.47451100  | 3.68482200  | -0.54370800 | C  | -2.38404400 | -0.70578500 | 0.85446400  |
| H | -0.41001700 | 4.77332200  | -2.88904200 | C  | -3.32050300 | -0.82794200 | 1.85817400  |
| H | -0.26246300 | 5.87170500  | -1.51703600 | C  | -1.70117700 | -2.75964200 | 1.81936900  |
|   |             |             |             | C  | -1.40985600 | -1.80689800 | 0.86239500  |
|   |             |             |             | C  | -4.41537900 | 0.10854500  | 2.27796200  |
|   |             |             |             | C  | -1.07805300 | -4.08661100 | 2.16464100  |
|   |             |             |             | C  | -0.37571700 | -2.86417100 | -1.65011500 |
|   |             |             |             | C  | 0.33352000  | -2.70271000 | -2.85112200 |
|   |             |             |             | C  | 0.03643000  | -3.48530300 | -3.96802200 |
|   |             |             |             | C  | -0.98831100 | -4.43157800 | -3.90568500 |
|   |             |             |             | C  | -1.71298000 | -4.58978500 | -2.72254600 |
|   |             |             |             | C  | -1.40882100 | -3.81319500 | -1.60295600 |
|   |             |             |             | C  | 1.32175800  | -2.86648800 | 0.70571800  |
|   |             |             |             | C  | 1.77336900  | -2.43821100 | 1.96738900  |
|   |             |             |             | C  | 2.76662100  | -3.14385300 | 2.64558600  |
|   |             |             |             | C  | 3.34314200  | -4.27972800 | 2.06939500  |
|   |             |             |             | C  | 2.91223400  | -4.70455000 | 0.81289300  |
|   |             |             |             | C  | 1.90814800  | -4.00570700 | 0.13648800  |
|   |             |             |             | P  | 0.04608500  | 1.66805400  | 0.23166700  |
|   |             |             |             | P  | 0.10882700  | -1.79445400 | -0.20937400 |
|   |             |             |             | S  | -3.08221600 | -2.28598100 | 2.77323600  |
|   |             |             |             | Rh | 1.43978700  | 0.13507200  | -0.59549600 |
|   |             |             |             | H  | -0.02632500 | 4.25636200  | 1.82611600  |
|   |             |             |             | H  | 0.44521400  | 6.59272200  | 1.21567100  |
|   |             |             |             | H  | 1.09126700  | 7.17817600  | -1.11376800 |
|   |             |             |             | H  | 1.27252800  | 5.37996900  | -2.82647600 |

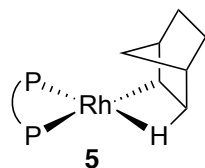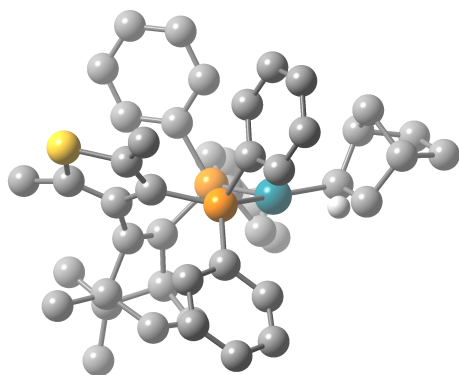

G=-3010.41874648  
ZPE=-3010.32477748

|   |             |             |             |
|---|-------------|-------------|-------------|
| H | 0.83896600  | 3.02846500  | -2.20406900 |
| H | -2.18071500 | 2.44231900  | 2.12084500  |
| H | -2.32214900 | 2.49503200  | 4.58872300  |
| H | -0.37964700 | 1.77975600  | 5.96570300  |
| H | 1.70923600  | 1.01815600  | 4.85024900  |
| H | 1.83579000  | 0.95160400  | 2.36588800  |
| H | -1.76224700 | 3.06449000  | -1.91888100 |
| H | -1.96815800 | 1.45604200  | -3.85655600 |
| H | -0.74459400 | 0.71694400  | -2.81276900 |
| H | -2.26949000 | -1.08111100 | -2.35341400 |
| H | -3.46598300 | -0.31880400 | -3.38487600 |
| H | -4.24258500 | 3.82977100  | -0.76690500 |
| H | -3.75210300 | 2.66790600  | 0.46368900  |
| H | -5.33493100 | 2.52046400  | -0.32038500 |
| H | -5.52944900 | 2.08291700  | -2.73425900 |
| H | -4.15631900 | 1.67528800  | -3.76235600 |
| H | -4.32736900 | 3.31101400  | -3.12782700 |
| H | -4.64604000 | -1.45325800 | -0.79974900 |
| H | -5.46605600 | -0.40965100 | -1.96441900 |
| H | -5.46139800 | 0.01366700  | -0.25061300 |
| H | -4.47178700 | 0.96378700  | 1.60566500  |
| H | -4.23009100 | 0.49259900  | 3.28815500  |
| H | -5.39531000 | -0.38202400 | 2.28880400  |
| H | -0.65613400 | -4.57431000 | 1.28563600  |
| H | -1.83202800 | -4.75552000 | 2.59119000  |
| H | -0.27006000 | -3.98308900 | 2.89605300  |
| H | 1.11178300  | -1.94608000 | -2.90663600 |
| H | 0.59679700  | -3.34737800 | -4.88858500 |
| H | -1.22733000 | -5.03569400 | -4.77642000 |
| H | -2.51859900 | -5.31716000 | -2.67078200 |
| H | -1.98825300 | -3.93291900 | -0.69308400 |
| H | 1.33838900  | -1.55336400 | 2.42226000  |
| H | 3.09500600  | -2.80321200 | 3.62389500  |
| H | 4.12122400  | -4.82539400 | 2.59549900  |
| H | 3.35268900  | -5.58615700 | 0.35493500  |
| H | 1.57958700  | -4.35580600 | -0.83643900 |
| C | 5.41125600  | 2.15825800  | -0.65864800 |
| C | 4.13159900  | 1.64561800  | 0.06246000  |
| C | 4.95631100  | -0.22739800 | -0.91383600 |
| C | 5.96265100  | 0.86930500  | -1.35189300 |
| H | 5.18592400  | 2.95870500  | -1.37054400 |
| H | 6.13463800  | 2.55627000  | 0.06309000  |
| H | 6.01937300  | 0.96291600  | -2.44183000 |
| H | 6.96978900  | 0.62667600  | -0.99625800 |
| C | 4.59459800  | 0.24109800  | 0.51142300  |
| H | 3.79536200  | -0.35331800 | 0.96534300  |
| H | 5.46088600  | 0.26109000  | 1.18328200  |
| C | 3.09126200  | 1.31207600  | -1.01988300 |

|   |            |             |             |
|---|------------|-------------|-------------|
| H | 2.88171900 | 2.14357500  | -1.69593700 |
| C | 3.63675100 | 0.04721500  | -1.67246400 |
| H | 2.92420400 | -0.84447300 | -1.48814000 |
| H | 3.73680100 | 0.07785800  | -2.76218900 |
| H | 3.77439700 | 2.31575500  | 0.84901200  |
| H | 5.33474600 | -1.24912300 | -1.01156200 |

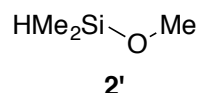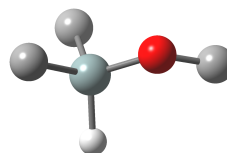

G=-484.933094  
ZPE=-484.199960

|    |             |             |             |
|----|-------------|-------------|-------------|
| O  | -0.98520600 | -0.64516400 | -0.32197100 |
| C  | -2.28239400 | -0.16159900 | -0.01914100 |
| H  | -2.44666500 | 0.84747400  | -0.42203900 |
| H  | -3.01563000 | -0.83354000 | -0.47521300 |
| H  | -2.46832500 | -0.13506600 | 1.06400700  |
| C  | 1.81049200  | -1.12067200 | -0.18978200 |
| H  | 1.64059900  | -2.15143400 | 0.13546900  |
| H  | 1.91169200  | -1.12468600 | -1.27990300 |
| H  | 2.76253500  | -0.78456100 | 0.23549700  |
| C  | 0.68928900  | 1.77594200  | -0.20225200 |
| H  | 0.81938500  | 1.83832600  | -1.28798300 |
| H  | -0.14479700 | 2.43003100  | 0.07326000  |
| H  | 1.59212600  | 2.18326700  | 0.26732000  |
| Si | 0.40403800  | -0.00366700 | 0.34943500  |
| H  | 0.26987700  | -0.01919200 | 1.84031100  |

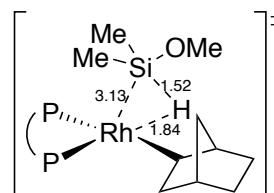

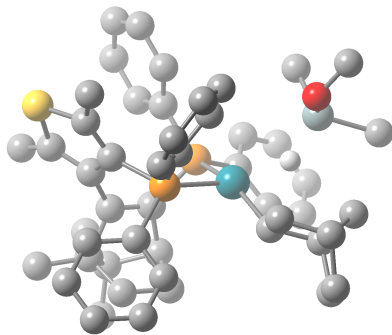

G=-3495.317263  
ZPE=-3495.211927

|    |             |             |             |
|----|-------------|-------------|-------------|
| Si | 2.90952400  | 2.62431400  | 0.98839300  |
| Rh | 1.12955100  | 0.38220800  | -0.26825300 |
| H  | 2.16690500  | 1.89831100  | -0.12063600 |
| O  | 3.79914900  | 1.49269800  | 1.84057400  |
| C  | -0.69713400 | 3.31322000  | -0.62619900 |
| C  | -1.14371800 | 4.49989700  | -0.02514500 |
| C  | -0.90597300 | 5.74058200  | -0.62446800 |
| C  | -0.22172900 | 5.81974500  | -1.83706000 |
| C  | 0.23321600  | 4.64729600  | -2.44582600 |
| C  | 0.00569600  | 3.41046500  | -1.84216200 |
| C  | -1.82909200 | 1.92987600  | 1.68455600  |
| C  | -3.09917300 | 2.53020900  | 1.70800400  |
| C  | -3.76976800 | 2.73319300  | 2.91476800  |
| C  | -3.18557100 | 2.32812400  | 4.11830400  |
| C  | -1.93170500 | 1.71703300  | 4.10734100  |
| C  | -1.26016400 | 1.52006000  | 2.89783800  |
| C  | -2.11511900 | 0.80660000  | -0.95576300 |
| C  | -2.41410800 | 1.13034100  | -2.41778600 |
| C  | -3.85533100 | 0.54815000  | -2.57427800 |
| C  | -3.42975800 | -0.84441300 | -1.95956100 |
| C  | -2.70425800 | -0.37820700 | -0.66783300 |
| C  | -1.55764000 | 0.11729800  | -3.24516900 |
| C  | -2.25494800 | -1.23449900 | -2.93322100 |
| C  | -4.91987200 | 1.33042500  | -1.78743600 |
| C  | -4.35749600 | 0.48222600  | -4.03010400 |
| C  | -4.48376800 | -1.93751300 | -1.84590600 |
| C  | -2.58830800 | -1.12303700 | 0.61844800  |
| C  | -3.67878400 | -1.26189300 | 1.45107600  |
| C  | -1.58936700 | -2.28016600 | 2.42914500  |
| C  | -1.36269600 | -1.71026500 | 1.19062000  |
| C  | -5.07724500 | -0.73092700 | 1.32461300  |
| C  | -0.73433000 | -3.03651700 | 3.41544400  |

|   |             |             |             |
|---|-------------|-------------|-------------|
| C | -0.04263300 | -3.15359700 | -0.87622000 |
| C | 0.80115600  | -3.37799500 | -1.97642600 |
| C | 0.60100800  | -4.46635200 | -2.82719000 |
| C | -0.44778100 | -5.35751500 | -2.59740200 |
| C | -1.29066200 | -5.15365700 | -1.50426900 |
| C | -1.08990300 | -4.06500200 | -0.65281100 |
| C | 1.50459300  | -2.47233400 | 1.43261300  |
| C | 2.21685600  | -1.62130300 | 2.29372100  |
| C | 3.16538100  | -2.13411000 | 3.17916300  |
| C | 3.44389200  | -3.50305100 | 3.19658900  |
| C | 2.77001900  | -4.35199800 | 2.31810400  |
| C | 1.80632700  | -3.84196800 | 1.44454400  |
| P | -0.86782700 | 1.61754900  | 0.12190000  |
| P | 0.26881300  | -1.70168600 | 0.27087000  |
| S | -3.25528300 | -2.09737700 | 2.90831700  |
| H | -1.67381700 | 4.46465100  | 0.91976600  |
| H | -1.25916700 | 6.64578900  | -0.13785500 |
| H | -0.04038000 | 6.78447400  | -2.30238300 |
| H | 0.77093400  | 4.69445900  | -3.38887200 |
| H | 0.38418200  | 2.50677500  | -2.31233800 |
| H | -3.56345400 | 2.84773100  | 0.77934400  |
| H | -4.74794600 | 3.20685100  | 2.91644300  |
| H | -3.70914100 | 2.48376000  | 5.05741900  |
| H | -1.47696100 | 1.38858500  | 5.03768900  |
| H | -0.29256000 | 1.02673700  | 2.88309500  |
| H | -2.28692400 | 2.17529500  | -2.70701400 |
| H | -1.58619500 | 0.35708400  | -4.31297300 |
| H | -0.51150200 | 0.13357300  | -2.92702300 |
| H | -1.59016800 | -1.96244400 | -2.47259600 |
| H | -2.65820800 | -1.70172500 | -3.83787700 |
| H | -5.09357100 | 2.30412000  | -2.26012400 |
| H | -4.63209100 | 1.51223200  | -0.75229100 |
| H | -5.87910800 | 0.79935400  | -1.79028900 |
| H | -5.35002300 | 0.01914700  | -4.06927900 |
| H | -3.70841300 | -0.07539500 | -4.70535400 |
| H | -4.45956200 | 1.49599100  | -4.43435500 |
| H | -4.07211100 | -2.82700000 | -1.35836000 |
| H | -4.82681100 | -2.23875000 | -2.84152200 |
| H | -5.36221600 | -1.62305200 | -1.27637100 |
| H | -5.20114800 | -0.17491600 | 0.39820700  |
| H | -5.30838000 | -0.04933500 | 2.15101200  |
| H | -5.82141900 | -1.53576400 | 1.34220500  |
| H | -0.36033500 | -3.97479200 | 2.99880500  |
| H | -1.32250500 | -3.28119700 | 4.30489600  |
| H | 0.13388100  | -2.45918100 | 3.73816900  |
| H | 1.62005600  | -2.70013500 | -2.17375100 |
| H | 1.26777200  | -4.61412400 | -3.67230100 |
| H | -0.60592200 | -6.20240900 | -3.26179000 |

|   |             |             |             |
|---|-------------|-------------|-------------|
| H | -2.10850900 | -5.84220200 | -1.30925000 |
| H | -1.75576400 | -3.92313400 | 0.19078300  |
| H | 2.04806300  | -0.54949600 | 2.23792100  |
| H | 3.70011600  | -1.45883800 | 3.84144300  |
| H | 4.19137300  | -3.90195200 | 3.87685200  |
| H | 2.99161000  | -5.41584700 | 2.31013800  |
| H | 1.28795200  | -4.51952400 | 0.77516100  |
| C | 4.88617000  | 1.82082200  | 2.69207800  |
| H | 4.56198400  | 2.40812300  | 3.56261900  |
| H | 5.32669300  | 0.88712300  | 3.05360600  |
| H | 5.66596600  | 2.38456800  | 2.16277200  |
| C | 1.79060800  | 3.59099800  | 2.14543300  |
| H | 1.13603500  | 2.94382800  | 2.73245300  |
| H | 2.40587100  | 4.17513900  | 2.84099100  |
| H | 1.16390900  | 4.29236000  | 1.58698500  |
| C | 4.01618200  | 3.84149100  | 0.06483700  |
| H | 4.61291100  | 4.45029300  | 0.75409500  |
| H | 4.69860500  | 3.33692500  | -0.62387500 |
| H | 3.39194100  | 4.52638500  | -0.52036000 |
| C | 2.69610800  | -0.43910100 | -1.45890700 |
| C | 3.57035000  | 0.63364300  | -2.18873700 |
| H | 2.08330500  | -0.92022600 | -2.23178000 |
| C | 3.78003400  | -1.43200400 | -0.93547700 |
| C | 4.00008300  | 0.02944800  | -3.55251100 |
| C | 4.91438700  | 0.58685300  | -1.42828900 |
| H | 3.10487000  | 1.61876300  | -2.29134300 |
| C | 5.08617800  | -0.93684500 | -1.59502100 |
| H | 3.88227600  | -1.37628300 | 0.15323100  |
| H | 3.56164100  | -2.47984500 | -1.17783900 |
| C | 4.98834900  | -1.10737700 | -3.13133500 |
| H | 3.14528100  | -0.34014100 | -4.12909300 |
| H | 4.50873900  | 0.78206300  | -4.16911200 |
| H | 4.84010400  | 0.87560100  | -0.37738500 |
| H | 5.70569500  | 1.17399000  | -1.91225200 |
| H | 5.99320000  | -1.36886400 | -1.15909100 |
| H | 4.62716500  | -2.10480300 | -3.40663300 |
| H | 5.96732900  | -0.97807400 | -3.60646300 |

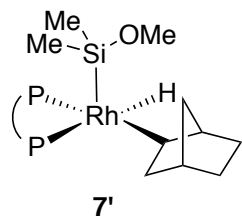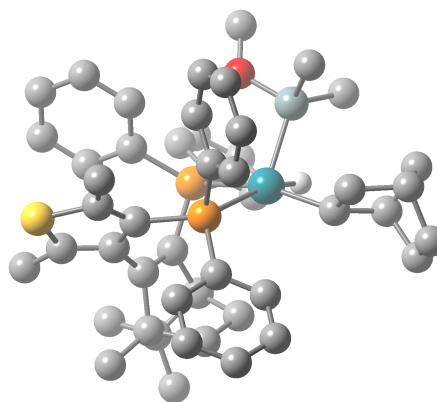

G=-3495.325442  
ZPE=-3495.220198

|    |             |             |             |
|----|-------------|-------------|-------------|
| Si | 1.37597200  | 2.92687000  | 1.16186500  |
| Rh | 0.94193800  | 1.16309300  | -0.27874300 |
| H  | 0.82179500  | 2.52517700  | -0.97677600 |
| O  | 0.01233800  | 3.04653800  | 2.18515900  |
| C  | -2.27470100 | 2.80837200  | -0.45600000 |
| C  | -3.33125400 | 3.40572300  | 0.24737100  |
| C  | -3.87209100 | 4.62473200  | -0.16963000 |
| C  | -3.37139600 | 5.27019600  | -1.29923100 |
| C  | -2.31322000 | 4.69294600  | -2.00389300 |
| C  | -1.76422700 | 3.48264200  | -1.57993400 |
| C  | -2.49457200 | 0.74703500  | 1.56377200  |
| C  | -3.84295300 | 0.37066900  | 1.44548500  |
| C  | -4.60144900 | 0.06120500  | 2.57454800  |
| C  | -4.02099700 | 0.11159600  | 3.84425100  |
| C  | -2.68407300 | 0.48588300  | 3.97443900  |
| C  | -1.92716600 | 0.80709100  | 2.84415800  |
| C  | -2.01168200 | -0.00450600 | -1.19468000 |
| C  | -2.13122200 | 0.31549000  | -2.68720200 |
| C  | -3.07486600 | -0.82367100 | -3.18256100 |
| C  | -2.18926800 | -1.93918100 | -2.50344900 |
| C  | -2.03300800 | -1.35628800 | -1.07044700 |
| C  | -0.75915500 | -0.10191900 | -3.30617300 |
| C  | -0.79596000 | -1.64856700 | -3.17512800 |
| C  | -4.51442300 | -0.69578000 | -2.65810100 |
| C  | -3.18407500 | -0.93562000 | -4.71613000 |
| C  | -2.62066000 | -3.39214000 | -2.64889000 |
| C  | -1.83361400 | -2.18486800 | 0.15326100  |
| C  | -2.86841600 | -2.92004900 | 0.69205400  |
| C  | -0.70798900 | -3.25480700 | 1.94670500  |
| C  | -0.57955200 | -2.36351800 | 0.89692700  |
| C  | -4.31984400 | -2.98175800 | 0.31680000  |

|   |             |             |             |   |             |             |             |
|---|-------------|-------------|-------------|---|-------------|-------------|-------------|
| C | 0.26948600  | -3.83077200 | 2.93853200  | H | 3.30118700  | -5.54453100 | -3.07934900 |
| C | 1.72695200  | -2.84953200 | -0.72748700 | H | 1.56530800  | -6.19074200 | -1.41647000 |
| C | 2.69721900  | -2.49857900 | -1.68005600 | H | 0.56212700  | -4.49221800 | 0.05451500  |
| C | 3.26449800  | -3.46229900 | -2.51659100 | H | 0.74648100  | -0.37533700 | 3.03777800  |
| C | 2.86442600  | -4.79521600 | -2.42528600 | H | 2.18583700  | -0.33113500 | 5.04202800  |
| C | 1.89090500  | -5.15695400 | -1.49255900 | H | 4.37935700  | -1.50973600 | 5.03418900  |
| C | 1.32720900  | -4.19495200 | -0.65337500 | H | 5.10880300  | -2.72978600 | 2.99247900  |
| C | 2.08983700  | -1.60327300 | 1.87670300  | H | 3.65897700  | -2.80215600 | 1.00152900  |
| C | 1.69812000  | -0.89696300 | 3.02581000  | C | -0.23311300 | 4.14520900  | 3.04221200  |
| C | 2.51120400  | -0.87359200 | 4.15874200  | H | -0.43287100 | 5.06697700  | 2.47978900  |
| C | 3.74286500  | -1.53379100 | 4.15446600  | H | -1.11766600 | 3.91697300  | 3.64771100  |
| C | 4.15083600  | -2.21753800 | 3.00939300  | H | 0.60609900  | 4.33715500  | 3.72748700  |
| C | 3.33068800  | -2.25530500 | 1.87875400  | C | 1.59468800  | 4.66837200  | 0.42393900  |
| P | -1.47674500 | 1.21310400  | 0.07957700  | H | 0.65994000  | 4.99817200  | -0.04296900 |
| P | 0.99853200  | -1.53415800 | 0.38053400  | H | 1.86765800  | 5.40277400  | 1.19175100  |
| S | -2.34455700 | -3.83235500 | 2.07166500  | H | 2.37164300  | 4.68526500  | -0.34530800 |
| H | -3.73567100 | 2.92680300  | 1.13082800  | C | 2.83820400  | 2.62290400  | 2.34369300  |
| H | -4.68735600 | 5.06803500  | 0.39576000  | H | 2.80677100  | 3.37322900  | 3.14510900  |
| H | -3.79431200 | 6.21690300  | -1.62340600 | H | 2.78768600  | 1.63346700  | 2.80426300  |
| H | -1.90407700 | 5.18918700  | -2.87964400 | H | 3.80786300  | 2.71475500  | 1.84776000  |
| H | -0.91844400 | 3.06741800  | -2.11787700 | C | 2.83820000  | 1.13216200  | -1.24015400 |
| H | -4.30751700 | 0.33044800  | 0.46588800  | C | 3.39074300  | 2.34448100  | -2.05224200 |
| H | -5.64622300 | -0.21669300 | 2.46273800  | H | 2.52950700  | 0.37260900  | -1.97931400 |
| H | -4.60987700 | -0.13348200 | 4.72376600  | C | 4.11538300  | 0.64697700  | -0.47482900 |
| H | -2.22678100 | 0.53741000  | 4.95883500  | C | 4.21688900  | 1.78240100  | -3.24001800 |
| H | -0.90625100 | 1.15453200  | 2.94993900  | C | 4.53019700  | 2.89096500  | -1.16547200 |
| H | -2.44820400 | 1.33139900  | -2.92645600 | H | 2.63382500  | 3.06938100  | -2.36086900 |
| H | -0.68080200 | 0.22014700  | -4.34940200 | C | 5.24809600  | 1.53089500  | -1.04665300 |
| H | 0.07362400  | 0.35600700  | -2.76326700 | H | 4.02745100  | 0.80059600  | 0.60473400  |
| H | 0.02034700  | -2.04984900 | -2.57476600 | H | 4.32849600  | -0.41951200 | -0.61532700 |
| H | -0.73794500 | -2.14049700 | -4.15155600 | C | 5.47058300  | 1.16543000  | -2.53505800 |
| H | -5.01851600 | 0.14274900  | -3.15159100 | H | 3.65349900  | 1.04810000  | -3.82631100 |
| H | -4.55979300 | -0.51690500 | -1.58417200 | H | 4.51015500  | 2.58766400  | -3.92531400 |
| H | -5.09677000 | -1.59688800 | -2.88307500 | H | 4.19571600  | 3.28246200  | -0.20300300 |
| H | -3.82593400 | -1.78067000 | -4.98968200 | H | 5.13321300  | 3.65896600  | -1.66531300 |
| H | -2.23086300 | -1.06948600 | -5.22791600 | H | 6.16367000  | 1.51834300  | -0.44621800 |
| H | -3.65186500 | -0.03167300 | -5.12288700 | H | 5.54948400  | 0.08200900  | -2.68129100 |
| H | -1.93927100 | -4.05947800 | -2.11149700 | H | 6.39802800  | 1.60834700  | -2.91495300 |
| H | -2.60568300 | -3.68771400 | -3.70349600 |   |             |             |             |
| H | -3.62975800 | -3.57426500 | -2.26972800 |   |             |             |             |
| H | -4.52495700 | -2.35069200 | -0.54558000 |   |             |             |             |
| H | -4.94888700 | -2.63013100 | 1.14217800  |   |             |             |             |
| H | -4.63400800 | -4.00362400 | 0.07484400  |   |             |             |             |
| H | 1.22464100  | -4.07730900 | 2.47223000  |   |             |             |             |
| H | -0.13636600 | -4.74795000 | 3.37547700  |   |             |             |             |
| H | 0.48015700  | -3.13569200 | 3.75651500  |   |             |             |             |
| H | 3.00616500  | -1.46672500 | -1.77801900 |   |             |             |             |
| H | 4.01405700  | -3.16440600 | -3.24427900 |   |             |             |             |

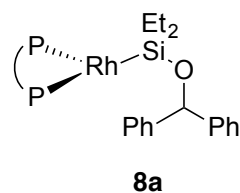

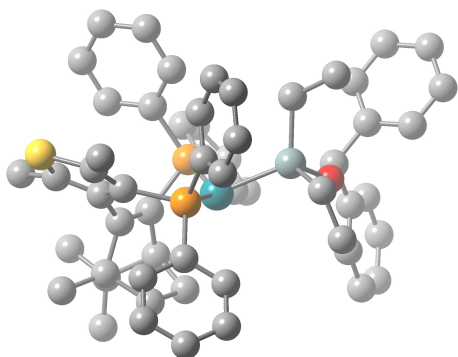

G = -3761.935139 Hartree

ZPE<sub>H</sub> = -3761.817271 Hartree

ZPE<sub>D</sub> = -3761.820593 Hartree

|    |            |             |             |
|----|------------|-------------|-------------|
| C  | 4.07738700 | -1.17848400 | -2.30424400 |
| C  | 4.29677600 | -1.17106900 | -0.92267400 |
| C  | 4.53512900 | -2.24126000 | -3.08955000 |
| C  | 4.97620200 | -2.25014700 | -0.34104600 |
| C  | 5.21183000 | -3.31097600 | -2.50310700 |
| H  | 4.36404900 | -2.22774100 | -4.16296000 |
| C  | 5.42895900 | -3.31212700 | -1.12241400 |
| H  | 5.15330800 | -2.25504000 | 0.73106300  |
| H  | 5.56805600 | -4.13615400 | -3.11343600 |
| H  | 5.95315000 | -4.14118700 | -0.65461900 |
| Si | 1.92412400 | 2.16526600  | -0.37942200 |
| C  | 3.85598900 | 0.00595600  | -0.05002200 |
| C  | 2.42524200 | 3.04031400  | 1.25169900  |
| C  | 3.52130700 | 4.11921600  | 1.20136100  |
| H  | 2.69450600 | 2.26369400  | 1.97979800  |
| H  | 1.49597500 | 3.48525100  | 1.63551700  |
| H  | 3.70183000 | 4.55033100  | 2.19388300  |
| H  | 4.47214100 | 3.71584200  | 0.84245000  |
| H  | 3.23938000 | 4.94333100  | 0.53731600  |
| C  | 2.28961500 | 3.36598700  | -1.82116700 |
| C  | 2.16301300 | 2.77250100  | -3.23247500 |
| H  | 1.62456600 | 4.23308600  | -1.71398100 |
| H  | 3.30826700 | 3.75113100  | -1.67612800 |
| H  | 1.16657700 | 2.35139200  | -3.40876600 |
| H  | 2.35067700 | 3.52255200  | -4.01058900 |
| H  | 2.88027500 | 1.95866900  | -3.37904800 |
| Rh | 0.32758800 | 0.52113300  | -0.31600800 |
| H  | 3.54206700 | -0.35034800 | -2.75438000 |
| O  | 2.91592400 | 0.78833600  | -0.77373800 |
| H  | 3.38439700 | -0.39868100 | 0.85599700  |
| C  | 5.07325900 | 0.82077000  | 0.38270900  |

|   |             |             |             |
|---|-------------|-------------|-------------|
| C | 5.46836700  | 0.84303900  | 1.72404100  |
| C | 5.83167300  | 1.53036600  | -0.55907000 |
| C | 6.59976200  | 1.56032300  | 2.12265900  |
| H | 4.88498100  | 0.29628900  | 2.46125700  |
| C | 6.95653500  | 2.25188100  | -0.16310000 |
| H | 5.53698100  | 1.50974200  | -1.60408400 |
| C | 7.34574000  | 2.26761300  | 1.18015700  |
| H | 6.89302300  | 1.56955800  | 3.16886200  |
| H | 7.53516600  | 2.79856600  | -0.90266600 |
| H | 8.22414000  | 2.82815800  | 1.48725300  |
| C | -1.78594900 | 3.39341700  | -0.44923800 |
| C | -2.52431600 | 4.33514500  | 0.28316800  |
| C | -2.69772500 | 5.63559800  | -0.19780300 |
| C | -2.14669400 | 6.01460300  | -1.42179500 |
| C | -1.41153600 | 5.08603300  | -2.16170400 |
| C | -1.22554300 | 3.79259000  | -1.67299000 |
| C | -2.05706400 | 1.72861200  | 1.88091300  |
| C | -3.40158800 | 1.71537300  | 2.28085400  |
| C | -3.74596000 | 1.84766100  | 3.62764900  |
| C | -2.75162900 | 2.00005100  | 4.59570800  |
| C | -1.41032500 | 2.01992800  | 4.20971200  |
| C | -1.06639000 | 1.88131400  | 2.86349600  |
| C | -2.86471200 | 0.74583100  | -0.78234100 |
| C | -3.20675800 | 1.06553600  | -2.24015900 |
| C | -4.63543400 | 0.45940200  | -2.37423400 |
| C | -4.17462200 | -0.92338400 | -1.77564300 |
| C | -3.42881900 | -0.45522300 | -0.49319600 |
| C | -2.33850300 | 0.07119800  | -3.07888100 |
| C | -3.00089700 | -1.29526800 | -2.75775700 |
| C | -5.70266600 | 1.21179100  | -1.56111900 |
| C | -5.15962100 | 0.39078000  | -3.82169700 |
| C | -5.21446600 | -2.02841100 | -1.65065400 |
| C | -3.26346200 | -1.32740700 | 0.70116400  |
| C | -4.32466400 | -1.61979900 | 1.53079000  |
| C | -2.25328900 | -2.92289500 | 2.13337700  |
| C | -2.04633500 | -2.05838900 | 1.07624000  |
| C | -5.70771000 | -1.03870300 | 1.56994800  |
| C | -1.35552500 | -3.91970500 | 2.81571900  |
| C | -0.23489100 | -3.15879300 | -0.92758200 |
| C | 0.79361300  | -3.07626000 | -1.88135300 |
| C | 0.98452500  | -4.09652600 | -2.81314000 |
| C | 0.13292200  | -5.20353400 | -2.82456500 |
| C | -0.90345200 | -5.28792300 | -1.89333800 |
| C | -1.08360700 | -4.27623700 | -0.94742400 |
| C | 0.84071700  | -2.15772100 | 1.58012500  |
| C | 0.88544000  | -1.34246600 | 2.72647200  |
| C | 1.84006100  | -1.56098700 | 3.71974400  |
| C | 2.78243000  | -2.58485600 | 3.57911700  |



|   |             |             |             |
|---|-------------|-------------|-------------|
| C | 2.75872700  | -3.38480000 | 2.43672900  |
| C | 1.79710100  | -3.17362900 | 1.44410800  |
| P | -1.52341500 | 1.63104200  | 0.10704600  |
| P | -0.40921800 | -1.74894200 | 0.26530800  |
| S | -3.88574800 | -2.79845700 | 2.72994300  |
| H | -2.96346800 | 4.06322100  | 1.23618200  |
| H | -3.26606000 | 6.35203100  | 0.38920800  |
| H | -2.28301300 | 7.02625300  | -1.79364100 |
| H | -0.97206500 | 5.36994900  | -3.11394800 |
| H | -0.63115600 | 3.08137600  | -2.23743400 |
| H | -4.18208400 | 1.60236500  | 1.53662000  |
| H | -4.79257500 | 1.83412800  | 3.92015500  |
| H | -3.02103000 | 2.10243400  | 5.64314500  |
| H | -0.62974000 | 2.14131900  | 4.95577300  |
| H | -0.02354600 | 1.88512800  | 2.56139200  |
| H | -3.10396200 | 2.11218700  | -2.53021800 |
| H | -2.38653500 | 0.30912600  | -4.14627600 |
| H | -1.28946300 | 0.11651300  | -2.76962500 |
| H | -2.31345700 | -2.00750500 | -2.29881400 |
| H | -3.39911100 | -1.77875000 | -3.65629600 |
| H | -5.91575800 | 2.17978500  | -2.02836400 |
| H | -5.39471400 | 1.40709400  | -0.53355800 |
| H | -6.64501100 | 0.65189100  | -1.53860100 |
| H | -6.14769600 | -0.08255900 | -3.84753800 |
| H | -4.51386900 | -0.15914700 | -4.50681100 |
| H | -5.27742300 | 1.40406900  | -4.22255800 |
| H | -4.79444800 | -2.91554200 | -1.16620900 |
| H | -5.56459400 | -2.33039900 | -2.64351900 |
| H | -6.09041500 | -1.71948300 | -1.07357000 |
| H | -5.84144100 | -0.31004900 | 0.77109700  |
| H | -5.88824000 | -0.52609300 | 2.52230400  |
| H | -6.48089100 | -1.80789600 | 1.46224400  |
| H | -0.69713300 | -4.41667300 | 2.10167200  |
| H | -1.95332800 | -4.68943400 | 3.31295600  |
| H | -0.72057000 | -3.44719100 | 3.57194500  |
| H | 1.45487700  | -2.21411600 | -1.89125100 |
| H | 1.79755700  | -4.02002400 | -3.52898700 |
| H | 0.27333600  | -5.99322600 | -3.55736200 |
| H | -1.57332800 | -6.14355600 | -1.89937100 |
| H | -1.89397200 | -4.34980700 | -0.22904400 |
| H | 0.16291900  | -0.54179600 | 2.84401700  |
| H | 1.84800300  | -0.93020300 | 4.60464300  |
| H | 3.52564300  | -2.75545800 | 4.35293700  |
| H | 3.48655100  | -4.18198200 | 2.31324300  |
| H | 1.79354600  | -3.80911600 | 0.56545600  |

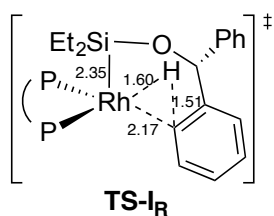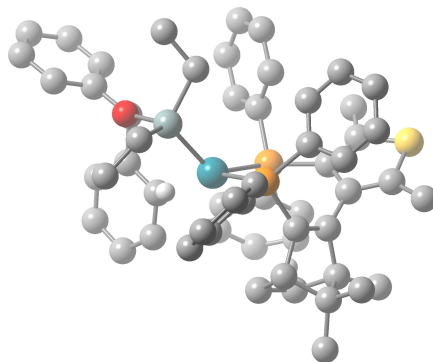

G = -3761.914822 Hartree

ZPE<sub>H</sub> = -3761.802614 Hartree

ZPE<sub>D</sub> = -3761.804465 Hartree

|    |            |             |             |
|----|------------|-------------|-------------|
| C  | 2.10178300 | 0.22155000  | -1.88366200 |
| C  | 3.45930100 | 0.05834600  | -1.50947900 |
| C  | 1.75058600 | -0.07817300 | -3.21486500 |
| C  | 4.37579300 | -0.46655200 | -2.42962700 |
| C  | 2.67392800 | -0.58706000 | -4.12943400 |
| H  | 0.73095800 | 0.08752500  | -3.54827400 |
| C  | 3.99246800 | -0.79797300 | -3.73110200 |
| H  | 5.40770800 | -0.61124800 | -2.12763900 |
| H  | 2.36057700 | -0.81472400 | -5.14527800 |
| H  | 4.72543900 | -1.19440000 | -4.42851300 |
| Si | 1.91713100 | 2.25964400  | 0.54413800  |
| C  | 3.89553300 | 0.46908300  | -0.09561000 |
| C  | 1.83419200 | 2.19618700  | 2.45714900  |
| C  | 3.04501800 | 2.84463900  | 3.15471800  |
| H  | 1.75670900 | 1.14675700  | 2.76470000  |
| H  | 0.90821500 | 2.68693900  | 2.78306300  |
| H  | 2.97590700 | 2.74849300  | 4.24550100  |
| H  | 3.98131400 | 2.37903300  | 2.83424200  |
| H  | 3.11813700 | 3.91360300  | 2.92813300  |
| C  | 1.87063900 | 4.08957300  | 0.02505100  |
| C  | 2.29411100 | 4.37210600  | -1.42434000 |
| H  | 0.86889300 | 4.49332200  | 0.21329600  |
| H  | 2.54550700 | 4.62261700  | 0.70971600  |
| H  | 1.63239900 | 3.87005300  | -2.13856400 |
| H  | 2.26802000 | 5.44454400  | -1.65201300 |

|    |             |             |             |   |             |             |             |
|----|-------------|-------------|-------------|---|-------------|-------------|-------------|
| H  | 3.30956200  | 4.01160000  | -1.61396900 | C | -0.57278900 | -5.26307100 | -2.11443400 |
| Rh | 0.53267400  | 0.64180400  | -0.44653900 | C | -0.77359500 | -4.25327800 | -1.17160600 |
| H  | 1.37079000  | 1.49170700  | -1.51281200 | C | 1.13925700  | -2.20734100 | 1.51545100  |
| O  | 3.50198500  | 1.81946300  | 0.13482400  | C | 0.99512400  | -1.59402800 | 2.77186600  |
| H  | 3.37724700  | -0.19407400 | 0.61346700  | C | 1.92830300  | -1.80742700 | 3.78642300  |
| C  | 5.38742600  | 0.34502500  | 0.17164100  | C | 3.03203400  | -2.63455800 | 3.56575800  |
| C  | 5.91890400  | -0.85540100 | 0.65778100  | C | 3.18556400  | -3.24862400 | 2.32305800  |
| C  | 6.25425900  | 1.41750500  | -0.07187600 | C | 2.25089500  | -3.03631100 | 1.30562300  |
| C  | 7.28974400  | -0.98856400 | 0.88707000  | P | -1.51925600 | 1.57967500  | 0.24133000  |
| H  | 5.25162200  | -1.68835500 | 0.86442400  | P | -0.09198000 | -1.81650600 | 0.17591300  |
| C  | 7.62417300  | 1.28763300  | 0.15993800  | S | -3.51821600 | -3.12986000 | 2.57476200  |
| H  | 5.84056200  | 2.35397800  | -0.42944800 | H | -2.65133800 | 4.11922500  | 1.50408900  |
| C  | 8.14775100  | 0.08397000  | 0.63753500  | H | -2.85175100 | 6.42273900  | 0.67761300  |
| H  | 7.68570200  | -1.92628400 | 1.26805300  | H | -2.10749300 | 7.00545700  | -1.62362500 |
| H  | 8.28465300  | 2.12951100  | -0.03028300 | H | -1.10595700 | 5.24199500  | -3.07062100 |
| H  | 9.21437400  | -0.01495800 | 0.81963700  | H | -0.83534800 | 2.94474900  | -2.21414000 |
| C  | -1.77315800 | 3.34004900  | -0.31203400 | H | -4.31159900 | 2.13266100  | 1.18439900  |
| C  | -2.31879000 | 4.34622400  | 0.49817800  | H | -5.36800400 | 2.12467400  | 3.41144600  |
| C  | -2.43304400 | 5.65838500  | 0.02872800  | H | -4.02674700 | 1.56430400  | 5.43134400  |
| C  | -2.01415400 | 5.98634300  | -1.25947100 | H | -1.61099500 | 1.02087300  | 5.19128200  |
| C  | -1.45636300 | 4.99637800  | -2.07216400 | H | -0.55633200 | 1.04043300  | 2.95324100  |
| C  | -1.32184900 | 3.69352000  | -1.59609600 | H | -3.12835200 | 2.05319500  | -2.45671000 |
| C  | -2.35245500 | 1.57194300  | 1.90464700  | H | -2.31442500 | 0.39228000  | -4.17803100 |
| C  | -3.71628300 | 1.87801100  | 2.05503500  | H | -1.16852800 | 0.23262400  | -2.84554800 |
| C  | -4.31405700 | 1.87801100  | 3.31504000  | H | -1.99044700 | -1.98966600 | -2.44087700 |
| C  | -3.56034500 | 1.56568600  | 4.45028600  | H | -3.13019600 | -1.79470000 | -3.75921700 |
| C  | -2.20692900 | 1.26104300  | 4.31534600  | H | -5.89467300 | 1.87867900  | -1.88219800 |
| C  | -1.61026800 | 1.26685900  | 3.05114500  | H | -5.30801300 | 1.04303800  | -0.44443700 |
| C  | -2.72487400 | 0.63171900  | -0.78375400 | H | -6.51944600 | 0.27926400  | -1.48729500 |
| C  | -3.13296200 | 0.98976700  | -2.21529100 | H | -6.01115700 | -0.32127800 | -3.81061700 |
| C  | -4.51035600 | 0.27151700  | -2.34647400 | H | -4.39402900 | -0.24320400 | -4.50798500 |
| C  | -3.92122000 | -1.09336600 | -1.82296800 | H | -5.26682700 | 1.24288200  | -4.13727500 |
| C  | -3.18424000 | -0.62091100 | -0.53546100 | H | -4.34147700 | -3.16823000 | -1.33314700 |
| C  | -2.21690700 | 0.11200300  | -3.12450500 | H | -5.24442300 | -2.54710800 | -2.71679400 |
| C  | -2.74931400 | -1.31990900 | -2.84906800 | H | -5.72018500 | -2.09726200 | -1.07675400 |
| C  | -5.61479300 | 0.89843700  | -1.47991200 | H | -5.61783200 | -0.67919800 | 0.72828900  |
| C  | -5.06191600 | 0.22549600  | -3.78485200 | H | -5.55142400 | -0.81036400 | 2.48325700  |
| C  | -4.86027600 | -2.28758100 | -1.72439000 | H | -6.15020400 | -2.16893000 | 1.52130500  |
| C  | -2.96483100 | -1.52011700 | 0.63246000  | H | -0.24237200 | -4.54664500 | 1.78782400  |
| C  | -4.00635000 | -1.89231300 | 1.45574600  | H | -1.53905800 | -5.08059200 | 2.86217200  |
| C  | -1.89280600 | -3.17209900 | 1.95293000  | H | -0.40554100 | -3.82887100 | 3.38900900  |
| C  | -1.72125300 | -2.22830000 | 0.95774000  | H | 1.98827600  | -2.37513200 | -1.81930900 |
| C  | -5.40748300 | -1.36371500 | 1.54825100  | H | 2.34974500  | -4.16427400 | -3.46003300 |
| C  | -0.96716300 | -4.20883000 | 2.52963200  | H | 0.70862900  | -6.02938700 | -3.67157000 |
| C  | 0.14775800  | -3.20124200 | -1.03844400 | H | -1.29813300 | -6.06754500 | -2.20052900 |
| C  | 1.27104500  | -3.18382000 | -1.88453700 | H | -1.65275400 | -4.28241300 | -0.53720100 |
| C  | 1.47377500  | -4.20071600 | -2.81910900 | H | 0.13011500  | -0.97049400 | 2.96928100  |
| C  | 0.55298100  | -5.24253000 | -2.93890200 | H | 1.79083600  | -1.32722300 | 4.75128500  |

|   |            |             |            |
|---|------------|-------------|------------|
| H | 3.76001600 | -2.80020000 | 4.35431200 |
| H | 4.03170800 | -3.90556700 | 2.14061500 |
| H | 2.38628700 | -3.53729500 | 0.35400600 |

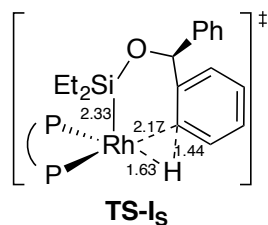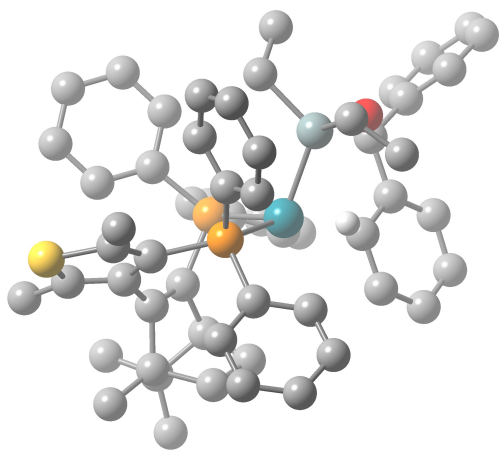

G = -3761.904931 Hartree

ZPE = -3761.793247 Hartree

|    |            |             |             |
|----|------------|-------------|-------------|
| C  | 2.11447000 | -0.45924200 | -1.93602300 |
| C  | 3.47812600 | -0.30415100 | -1.57915600 |
| C  | 1.75851800 | -0.21861400 | -3.28096000 |
| C  | 4.40264800 | 0.12481400  | -2.53917300 |
| C  | 2.68571400 | 0.22142200  | -4.22565900 |
| H  | 0.73402500 | -0.39922700 | -3.59590300 |
| C  | 4.01754000 | 0.39690500  | -3.85365800 |
| H  | 5.44051300 | 0.25763000  | -2.25207100 |
| H  | 2.36923800 | 0.40623300  | -5.24913900 |
| H  | 4.75669800 | 0.72338700  | -4.57982800 |
| Si | 1.78722400 | -2.10041500 | 0.72386600  |
| C  | 3.89012300 | -0.53177100 | -0.12146300 |
| C  | 5.38549500 | -0.46418600 | 0.14376600  |
| C  | 5.98667900 | 0.75878200  | 0.46557200  |
| C  | 6.18420500 | -1.61137600 | 0.06737900  |
| C  | 7.36108000 | 0.83797700  | 0.69943700  |
| H  | 5.37418700 | 1.65536600  | 0.53031500  |
| C  | 7.55711000 | -1.53470500 | 0.30418500  |
| H  | 5.71520400 | -2.56180000 | -0.16308800 |
| C  | 8.15090100 | -0.31021900 | 0.61961200  |

|    |             |             |             |
|----|-------------|-------------|-------------|
| H  | 7.81185900  | 1.79410400  | 0.95153300  |
| H  | 8.16488800  | -2.43378800 | 0.24583800  |
| H  | 9.21961600  | -0.25271000 | 0.80704700  |
| C  | 1.70734000  | -3.96898900 | 0.36975900  |
| C  | 1.99262200  | -4.41631800 | -1.06931500 |
| H  | 0.74995800  | -4.37135600 | 0.71301900  |
| H  | 2.46994300  | -4.39339400 | 1.04120100  |
| H  | 2.03976100  | -5.50908900 | -1.15137800 |
| H  | 1.21127900  | -4.07132000 | -1.75548400 |
| H  | 2.94441700  | -4.01292000 | -1.42901700 |
| C  | 2.93359500  | -1.60950100 | 3.35568900  |
| H  | 2.78096900  | -1.53664900 | 4.43996000  |
| H  | 3.67432800  | -2.39427800 | 3.17589900  |
| H  | 3.39081100  | -0.67194100 | 3.02181700  |
| Rh | 0.48684700  | -0.61567300 | -0.51507200 |
| H  | 1.28655800  | -1.57350700 | -1.56587300 |
| O  | 3.39949900  | -1.79040300 | 0.31948800  |
| H  | 3.41789000  | 0.27413800  | 0.46381000  |
| H  | 0.87019100  | -1.13316500 | 2.86535100  |
| C  | 1.61045700  | -1.90082900 | 2.62571900  |
| H  | 1.19239000  | -2.84691800 | 2.99229300  |
| C  | 1.42176100  | 2.96493200  | 0.42682600  |
| C  | 1.45477400  | 4.09851200  | 1.25559200  |
| C  | 2.39198100  | 5.10949300  | 1.03941000  |
| C  | 3.31001400  | 5.00704300  | -0.00838800 |
| C  | 3.28280600  | 3.88801100  | -0.84152400 |
| C  | 2.34712200  | 2.87340100  | -0.62330800 |
| C  | -0.20257200 | 1.81607500  | 2.44752600  |
| C  | -1.38569300 | 2.38503300  | 2.93407900  |
| C  | -1.58490300 | 2.55110600  | 4.30741600  |
| C  | -0.59987100 | 2.16210900  | 5.21454400  |
| C  | 0.59333700  | 1.61171200  | 4.73999900  |
| C  | 0.78806200  | 1.43825700  | 3.37054500  |
| C  | -1.25036400 | 2.21703800  | -0.30531300 |
| C  | -1.03872300 | 3.08786600  | -1.55091900 |
| C  | -2.40513500 | 3.82292900  | -1.66508700 |
| C  | -3.21148500 | 2.47173500  | -1.56337000 |
| C  | -2.55208000 | 1.82286500  | -0.30591100 |
| C  | -1.09281600 | 2.09513600  | -2.75250000 |
| C  | -2.58132200 | 1.65901300  | -2.75486600 |
| C  | -2.64023400 | 4.83904600  | -0.53417900 |
| C  | -2.60947200 | 4.58798800  | -2.98673600 |
| C  | -4.72997200 | 2.54253600  | -1.65121000 |
| C  | -3.30555900 | 0.87596700  | 0.56710400  |
| C  | -4.35910700 | 1.33014400  | 1.33653700  |
| C  | -4.21973100 | -1.18264500 | 1.30485400  |
| C  | -3.18629700 | -0.59083900 | 0.59803000  |
| C  | -4.79360600 | 2.72688900  | 1.67764500  |

|   |             |             |             |   |             |             |             |
|---|-------------|-------------|-------------|---|-------------|-------------|-------------|
| C | -4.65380000 | -2.61094600 | 1.51446700  | H | -3.81206100 | -3.18176100 | -5.28580800 |
| C | -2.45586100 | -2.04014400 | -1.80700800 | H | -5.37537600 | -2.31715500 | -3.55488800 |
| C | -1.58335300 | -2.52182700 | -2.79700500 | H | -4.51960700 | -1.59316700 | -1.35760900 |
| C | -2.06849500 | -2.93921400 | -4.03764500 | H | -1.39299500 | -2.12731500 | 2.67747700  |
| C | -3.43447400 | -2.86703900 | -4.31703700 | H | -1.31290800 | -4.20343100 | 4.00125600  |
| C | -4.31116600 | -2.38193700 | -3.34547200 | H | -1.63781500 | -6.41078200 | 2.89481900  |
| C | -3.82740500 | -1.97533700 | -2.10009000 | H | -2.03982500 | -6.50462500 | 0.44074200  |
| C | -1.78051600 | -3.12219900 | 0.79769900  | H | -2.13517700 | -4.43075600 | -0.88411900 |
| C | -1.53786000 | -3.08188500 | 2.18043400  |   |             |             |             |
| C | -1.49380000 | -4.25684000 | 2.93127100  |   |             |             |             |
| C | -1.67601100 | -5.49567900 | 2.31108800  |   |             |             |             |
| C | -1.90145500 | -5.54710500 | 0.93515100  |   |             |             |             |
| C | -1.95301600 | -4.37069600 | 0.18330900  |   |             |             |             |
| P | 0.18821700  | 1.58492400  | 0.65158500  |   |             |             |             |
| P | -1.75133700 | -1.52915700 | -0.15728900 |   |             |             |             |
| S | -5.24918300 | 0.01714800  | 2.03497500  |   |             |             |             |
| H | 0.75102000  | 4.19267900  | 2.07586800  |   |             |             |             |
| H | 2.40451800  | 5.97839000  | 1.69191700  |   |             |             |             |
| H | 4.04112200  | 5.79388500  | -0.17215300 |   |             |             |             |
| H | 3.99164600  | 3.79301500  | -1.65915800 |   |             |             |             |
| H | 2.33639300  | 2.00482700  | -1.27100500 |   |             |             |             |
| H | -2.14885300 | 2.70694000  | 2.23963000  |   |             |             |             |
| H | -2.51054300 | 2.99398200  | 4.66534700  |   |             |             |             |
| H | -0.75594900 | 2.29221000  | 6.28162900  |   |             |             |             |
| H | 1.37412100  | 1.31599600  | 5.43489600  |   |             |             |             |
| H | 1.72443800  | 1.01992000  | 3.01583700  |   |             |             |             |
| H | -0.15355900 | 3.72381100  | -1.53040700 |   |             |             |             |
| H | -0.80588800 | 2.58854500  | -3.68623900 |   |             |             |             |
| H | -0.40169800 | 1.26292100  | -2.60931500 |   |             |             |             |
| H | -2.71696000 | 0.58578000  | -2.61263800 |   |             |             |             |
| H | -3.07944900 | 1.91792200  | -3.69507200 |   |             |             |             |
| H | -2.00365200 | 5.71741100  | -0.68852200 |   |             |             |             |
| H | -2.40487600 | 4.43952000  | 0.45285000  |   |             |             |             |
| H | -3.67762900 | 5.19357500  | -0.52960400 |   |             |             |             |
| H | -3.60170300 | 5.05253000  | -3.00619800 |   |             |             |             |
| H | -2.51918200 | 3.97079800  | -3.88096900 |   |             |             |             |
| H | -1.87388600 | 5.39634600  | -3.06868200 |   |             |             |             |
| H | -5.18424200 | 1.55732400  | -1.50761300 |   |             |             |             |
| H | -5.02793000 | 2.89998900  | -2.64271000 |   |             |             |             |
| H | -5.16647400 | 3.22076100  | -0.91425900 |   |             |             |             |
| H | -4.17842200 | 3.46705800  | 1.16916900  |   |             |             |             |
| H | -4.70836300 | 2.90757100  | 2.75620200  |   |             |             |             |
| H | -5.83876100 | 2.90805100  | 1.40312100  |   |             |             |             |
| H | -4.43991000 | -3.22894100 | 0.64267900  |   |             |             |             |
| H | -5.73320600 | -2.64567600 | 1.69145700  |   |             |             |             |
| H | -4.15954100 | -3.07502300 | 2.37282500  |   |             |             |             |
| H | -0.51886100 | -2.55883500 | -2.58587300 |   |             |             |             |
| H | -1.37612600 | -3.31263900 | -4.78700100 |   |             |             |             |
|   |             |             |             | H | -3.81206100 | -3.18176100 | -5.28580800 |
|   |             |             |             | H | -5.37537600 | -2.31715500 | -3.55488800 |
|   |             |             |             | H | -4.51960700 | -1.59316700 | -1.35760900 |
|   |             |             |             | H | -1.39299500 | -2.12731500 | 2.67747700  |
|   |             |             |             | H | -1.31290800 | -4.20343100 | 4.00125600  |
|   |             |             |             | H | -1.63781500 | -6.41078200 | 2.89481900  |
|   |             |             |             | H | -2.03982500 | -6.50462500 | 0.44074200  |
|   |             |             |             | H | -2.13517700 | -4.43075600 | -0.88411900 |

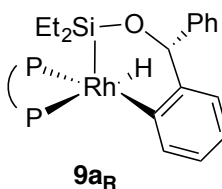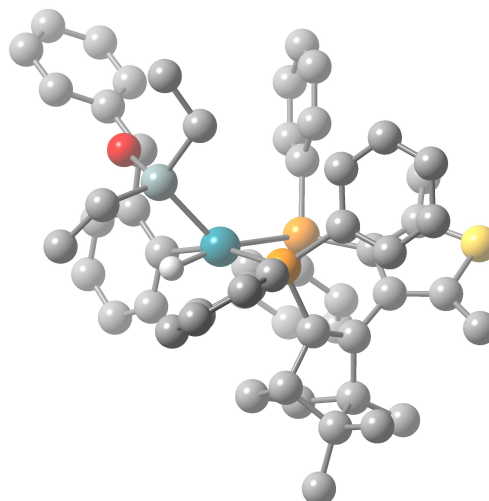

G = -3761.927378 Hartree  
 ZPE<sub>H</sub> = -3761.814971 Hartree  
 ZPE<sub>D</sub> = -3761.817199 Hartree

|    |            |             |             |
|----|------------|-------------|-------------|
| C  | 2.05278900 | 0.20618800  | -1.79012200 |
| C  | 3.42238600 | 0.10162300  | -1.44650900 |
| C  | 1.70573900 | -0.11303800 | -3.11634200 |
| C  | 4.35991600 | -0.35431600 | -2.38477700 |
| C  | 2.64320300 | -0.55624600 | -4.05435200 |
| H  | 0.67216100 | -0.03179100 | -3.43799100 |
| C  | 3.97906200 | -0.69082200 | -3.68493800 |
| H  | 5.40346700 | -0.43742400 | -2.09896900 |
| H  | 2.32399800 | -0.79643100 | -5.06608100 |
| H  | 4.72233300 | -1.03493800 | -4.39935000 |
| Si | 1.90398700 | 2.45964700  | 0.22444100  |
| C  | 3.86249500 | 0.55387200  | -0.04824200 |

|    |             |             |             |   |             |             |             |
|----|-------------|-------------|-------------|---|-------------|-------------|-------------|
| C  | 1.58875300  | 2.78017400  | 2.08437000  | C | -5.68611100 | 0.46009700  | -1.59077300 |
| C  | 2.65434800  | 3.66713000  | 2.75598100  | C | -4.95928900 | -0.00424900 | -3.89662400 |
| H  | 1.55685000  | 1.80624000  | 2.58797700  | C | -4.51678100 | -2.59321600 | -1.98972100 |
| H  | 0.59576100  | 3.23202700  | 2.20125800  | C | -2.84385700 | -1.72620100 | 0.52741600  |
| H  | 2.47124500  | 3.76770400  | 3.83308000  | C | -3.87955300 | -2.25827700 | 1.26907300  |
| H  | 3.65538300  | 3.24603800  | 2.62369500  | C | -1.64516700 | -3.19813800 | 1.94728100  |
| H  | 2.66325200  | 4.67724000  | 2.33350700  | C | -1.53611600 | -2.24458900 | 0.95093700  |
| C  | 1.97185500  | 4.16555500  | -0.61802400 | C | -5.34887100 | -1.95232000 | 1.25437800  |
| C  | 2.35433900  | 4.16911300  | -2.10555500 | C | -0.63476100 | -4.09500900 | 2.61133300  |
| H  | 1.00318900  | 4.66329200  | -0.47534200 | C | 0.46132900  | -3.11540700 | -0.94157000 |
| H  | 2.70367800  | 4.76068500  | -0.05453400 | C | 1.66560200  | -3.12165100 | -1.66907900 |
| H  | 1.64100800  | 3.59299500  | -2.70640100 | C | 1.95450400  | -4.15994600 | -2.55608600 |
| H  | 2.38422800  | 5.18682700  | -2.51353200 | C | 1.04413500  | -5.19951600 | -2.74929100 |
| H  | 3.33928100  | 3.71816800  | -2.26055000 | C | -0.15889300 | -5.19811800 | -2.04318500 |
| Rh | 0.46325000  | 0.76623800  | -0.55592300 | C | -0.44712700 | -4.16806400 | -1.14592300 |
| H  | 0.56795800  | 2.08383800  | -1.36663600 | C | 1.28850300  | -1.96038400 | 1.61966800  |
| O  | 3.50035400  | 1.92325600  | 0.12008800  | C | 1.11423500  | -1.18138000 | 2.77507800  |
| H  | 3.32143900  | -0.05479400 | 0.69075100  | C | 1.99514400  | -1.29034600 | 3.85058900  |
| C  | 5.34864200  | 0.40824100  | 0.23929600  | C | 3.07765500  | -2.17114200 | 3.78659100  |
| C  | 5.86134800  | -0.81563300 | 0.68699800  | C | 3.26398600  | -2.94323800 | 2.64030300  |
| C  | 6.23100300  | 1.47817000  | 0.04923500  | C | 2.37833700  | -2.83987000 | 1.56385300  |
| C  | 7.22617700  | -0.97218700 | 0.93315100  | P | -1.70984200 | 1.50940900  | 0.30088900  |
| H  | 5.18357200  | -1.64976600 | 0.84750900  | P | 0.08901800  | -1.71617000 | 0.22241700  |
| C  | 7.59610400  | 1.32496600  | 0.29799200  | S | -3.30019200 | -3.40453300 | 2.43521300  |
| H  | 5.83251000  | 2.43018300  | -0.28280300 | H | -3.35445900 | 3.64898700  | 1.68017800  |
| C  | 8.09985600  | 0.09964400  | 0.73875700  | H | -3.91648800 | 5.96240100  | 1.07694500  |
| H  | 7.60630800  | -1.92861100 | 1.28277600  | H | -3.09797500 | 6.94129000  | -1.05924000 |
| H  | 8.26791000  | 2.16622700  | 0.14866400  | H | -1.67718000 | 5.56500000  | -2.57308100 |
| H  | 9.16231300  | -0.01787800 | 0.93392800  | H | -1.07205700 | 3.25951400  | -1.94732900 |
| C  | -2.19049400 | 3.26425700  | -0.10130400 | H | -4.48145900 | 1.07555300  | 1.35274300  |
| C  | -2.98437300 | 4.05315200  | 0.74534000  | H | -5.41279100 | 0.92633200  | 3.63056100  |
| C  | -3.30546200 | 5.36883400  | 0.40254100  | H | -3.91002900 | 1.07198700  | 5.60861700  |
| C  | -2.84665100 | 5.91834600  | -0.79397600 | H | -1.46513400 | 1.39046000  | 5.27153000  |
| C  | -2.05185700 | 5.14625100  | -1.64342600 | H | -0.54111600 | 1.55577300  | 2.99258500  |
| C  | -1.71792000 | 3.83756600  | -1.29457500 | H | -3.32762900 | 1.97251700  | -2.36556500 |
| C  | -2.43654400 | 1.30686400  | 1.99935200  | H | -2.26690300 | 0.53546800  | -4.15578500 |
| C  | -3.81515700 | 1.13573000  | 2.20541400  | H | -1.14372200 | 0.46219700  | -2.79955400 |
| C  | -4.34217500 | 1.05314700  | 3.49414600  | H | -1.67330200 | -1.87545800 | -2.52042100 |
| C  | -3.49960200 | 1.13833800  | 4.60512900  | H | -2.76643700 | -1.76728500 | -3.88749700 |
| C  | -2.12987500 | 1.31483900  | 4.41568200  | H | -6.09866200 | 1.39514400  | -1.98582500 |
| C  | -1.60443100 | 1.40001200  | 3.12348400  | H | -5.43620500 | 0.63331300  | -0.54423400 |
| C  | -2.81056900 | 0.50022400  | -0.77137600 | H | -6.48658900 | -0.28729700 | -1.63624600 |
| C  | -3.20818500 | 0.90148100  | -2.19514000 | H | -5.84580400 | -0.64151300 | -3.98962400 |
| C  | -4.47583300 | 0.02633500  | -2.43346600 | H | -4.21844300 | -0.36953800 | -4.60801300 |
| C  | -3.73791000 | -1.28566400 | -1.96190700 | H | -5.25229900 | 1.00323700  | -4.21333400 |
| C  | -3.12068600 | -0.81160700 | -0.61575800 | H | -3.91814700 | -3.41975300 | -1.59427700 |
| C  | -2.15761000 | 0.21014000  | -3.11654900 | H | -4.78706400 | -2.84716100 | -3.02014900 |
| C  | -2.49855600 | -1.29407200 | -2.93721600 | H | -5.44156900 | -2.54801100 | -1.40883600 |

|   |             |             |             |    |             |             |             |
|---|-------------|-------------|-------------|----|-------------|-------------|-------------|
| H | -5.58807300 | -1.21989800 | 0.48593100  | H  | -2.54146400 | 0.59993200  | 5.07734000  |
| H | -5.66716100 | -1.53761500 | 2.21783500  | H  | -4.87017200 | 0.99933900  | 4.26166300  |
| H | -5.95067000 | -2.84937900 | 1.06951500  | Si | -1.91290700 | -2.40196800 | 0.01609900  |
| H | 0.07931300  | -4.48907800 | 1.88587800  | C  | -3.78097200 | -0.34569500 | -0.12043200 |
| H | -1.13789600 | -4.94590000 | 3.07969400  | C  | -5.25969000 | -0.24990000 | -0.46302200 |
| H | -0.06553900 | -3.57338900 | 3.38626600  | C  | -5.80031900 | 0.95347600  | -0.93086600 |
| H | 2.38175500  | -2.31834200 | -1.55058200 | C  | -6.10493900 | -1.35612700 | -0.31072200 |
| H | 2.89124000  | -4.13947300 | -3.10478400 | C  | -7.16061000 | 1.05464300  | -1.23155200 |
| H | 1.26874300  | -6.00180900 | -3.44648900 | H  | -5.15231500 | 1.81680200  | -1.06138900 |
| H | -0.87733700 | -6.00080300 | -2.18482700 | C  | -7.46303000 | -1.25818800 | -0.61329100 |
| H | -1.38368900 | -4.18834300 | -0.60046500 | H  | -5.68368800 | -2.29492700 | 0.03316100  |
| H | 0.27092100  | -0.50353800 | 2.84218400  | C  | -7.99669700 | -0.05155500 | -1.07323800 |
| H | 1.83658200  | -0.68461200 | 4.73840500  | H  | -7.56426600 | 1.99536900  | -1.59670400 |
| H | 3.76786400  | -2.25269900 | 4.62093500  | H  | -8.10623800 | -2.12605700 | -0.49354000 |
| H | 4.09792700  | -3.63703800 | 2.58042600  | H  | -9.05414800 | 0.02315800  | -1.31194300 |
| H | 2.53398000  | -3.46279300 | 0.69023700  | C  | -2.44436400 | -3.79505100 | 1.21022700  |

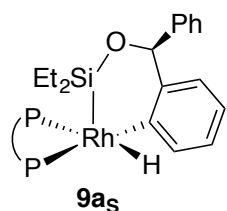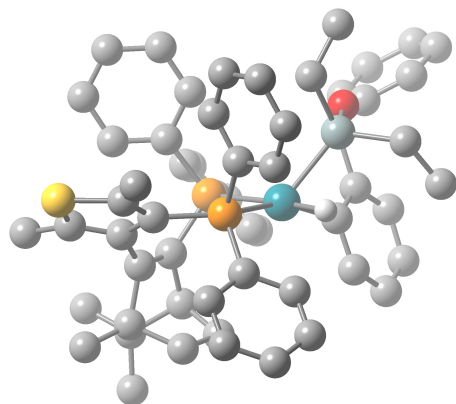

G = -3761.926504 Hartree

ZPE = -3761.814571 Hartree

|   |             |             |            |   |             |            |             |
|---|-------------|-------------|------------|---|-------------|------------|-------------|
| C | -2.11447900 | -0.30445100 | 1.79201700 | C | -0.00868200 | 1.19200800 | -2.35242500 |
| C | -3.44100900 | -0.09363900 | 1.35271700 | C | 0.83060000  | 2.04574700 | -3.08238400 |
| C | -1.83459300 | -0.06713100 | 3.15220300 | C | 0.98507800  | 1.87966600 | -4.45969800 |
| C | -4.41297400 | 0.37403600  | 2.25046800 | C | 0.29559000  | 0.86481700 | -5.12661000 |
| C | -2.80135700 | 0.41660900  | 4.03723700 | C | -0.55475700 | 0.01950500 | -4.41141500 |
| H | -0.83578300 | -0.26451400 | 3.53516900 | C | -0.70415700 | 0.17935600 | -3.03242200 |
| C | -4.10111100 | 0.63916000  | 3.58362200 | C | 1.08036700  | 2.27899400 | 0.18600200  |
| H | -5.42632600 | 0.53721200  | 1.89879400 | C | 0.89071700  | 3.19796700 | 1.39843500  |
|   |             |             |            | C | 2.14215900  | 4.11842100 | 1.30077400  |

|   |             |             |             |   |            |             |             |
|---|-------------|-------------|-------------|---|------------|-------------|-------------|
| C | 3.11598700  | 2.88747000  | 1.17428100  | H | 1.54192300 | 5.69769300  | 2.66804000  |
| C | 2.41368200  | 2.07064800  | 0.04597300  | H | 5.18044400 | 2.24650600  | 0.93261000  |
| C | 1.22618300  | 2.30730400  | 2.63731000  | H | 4.96479800 | 3.65483600  | 1.97455200  |
| C | 2.75328400  | 2.08483900  | 2.47853700  | H | 4.85044400 | 3.82946300  | 0.22272700  |
| C | 2.10810200  | 5.07049300  | 0.09297700  | H | 3.62447600 | 3.74183100  | -1.75073700 |
| C | 2.37770500  | 4.99985500  | 2.54298400  | H | 4.00171900 | 3.09101600  | -3.34745400 |
| C | 4.60745900  | 3.17015200  | 1.05967400  | H | 5.29981100 | 3.37858000  | -2.18713900 |
| C | 3.18079800  | 1.15062800  | -0.83653100 | H | 4.67717400 | -2.81886900 | -0.65154300 |
| C | 4.07743300  | 1.64342100  | -1.76094700 | H | 5.98728600 | -2.14667000 | -1.62690100 |
| C | 4.29708500  | -0.84649200 | -1.44933300 | H | 4.53083600 | -2.78235600 | -2.40392600 |
| C | 3.25729600  | -0.31096200 | -0.70835700 | H | 1.12545400 | -2.26858600 | 2.87971100  |
| C | 4.26292600  | 3.03807800  | -2.28344500 | H | 2.27758500 | -2.77866600 | 5.00887200  |
| C | 4.89885600  | -2.22489200 | -1.53723500 | H | 4.73519600 | -2.43657600 | 5.21330600  |
| C | 2.91597400  | -1.67094800 | 1.84245600  | H | 6.02136900 | -1.58564500 | 3.26047100  |
| C | 2.19966200  | -2.13635900 | 2.95828000  | H | 4.87452400 | -1.08830300 | 1.14005400  |
| C | 2.85187400  | -2.41683600 | 4.16065000  | H | 1.77248500 | -2.05281500 | -2.59074200 |
| C | 4.22906600  | -2.22457800 | 4.27578600  | H | 1.78285800 | -4.19218000 | -3.81313300 |
| C | 4.95018600  | -1.74850700 | 3.17983300  | H | 2.06917200 | -6.33833800 | -2.58488400 |
| C | 4.30096500  | -1.47430800 | 1.97514800  | H | 2.32897000 | -6.31055300 | -0.11009400 |
| C | 2.07899400  | -2.95294400 | -0.64915600 | H | 2.35147700 | -4.17197600 | 1.11363700  |
| C | 1.90371700  | -2.98054400 | -2.04192200 |   |            |             |             |
| C | 1.91095900  | -4.19078800 | -2.73429700 |   |            |             |             |
| C | 2.06729800  | -5.39572800 | -2.04533000 |   |            |             |             |
| C | 2.21274700  | -5.37946200 | -0.65767200 |   |            |             |             |
| C | 2.22050300  | -4.16710300 | 0.03676700  |   |            |             |             |
| P | -0.33805300 | 1.37189700  | -0.54677300 |   |            |             |             |
| P | 2.01750800  | -1.32840000 | 0.24455400  |   |            |             |             |
| S | 5.07676900  | 0.38098400  | -2.40937100 |   |            |             |             |
| H | -1.55814400 | 3.19429100  | -2.61627400 |   |            |             |             |
| H | -3.33404800 | 4.89180100  | -2.50801800 |   |            |             |             |
| H | -4.49752600 | 5.35798700  | -0.35763000 |   |            |             |             |
| H | -3.86206800 | 4.07870900  | 1.68403000  |   |            |             |             |
| H | -2.10451300 | 2.36658900  | 1.57737600  |   |            |             |             |
| H | 1.35992800  | 2.84299300  | -2.57371900 |   |            |             |             |
| H | 1.64030400  | 2.54709700  | -5.01289900 |   |            |             |             |
| H | 0.41649900  | 0.73779300  | -6.19870500 |   |            |             |             |
| H | -1.10341400 | -0.76592500 | -4.92307600 |   |            |             |             |
| H | -1.36870300 | -0.47812600 | -2.48093700 |   |            |             |             |
| H | -0.06870000 | 3.71093100  | 1.45546200  |   |            |             |             |
| H | 0.98011700  | 2.82322900  | 3.57041900  |   |            |             |             |
| H | 0.65454600  | 1.37676800  | 2.62571000  |   |            |             |             |
| H | 3.02818100  | 1.03341500  | 2.38438000  |   |            |             |             |
| H | 3.31323300  | 2.47940200  | 3.33273800  |   |            |             |             |
| H | 1.37803200  | 5.86862700  | 0.26738500  |   |            |             |             |
| H | 1.82648200  | 4.57218900  | -0.83524900 |   |            |             |             |
| H | 3.08113300  | 5.55371800  | -0.05349200 |   |            |             |             |
| H | 3.28377000  | 5.60271700  | 2.41530900  | C | 2.38657700 | 0.96245200  | -1.28706600 |
| H | 2.48255500  | 4.44403500  | 3.47521200  | C | 3.53952600 | 0.14752800  | -1.20950100 |

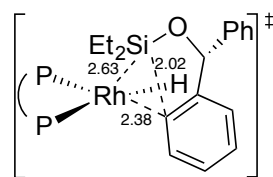

TS-II<sub>R</sub>

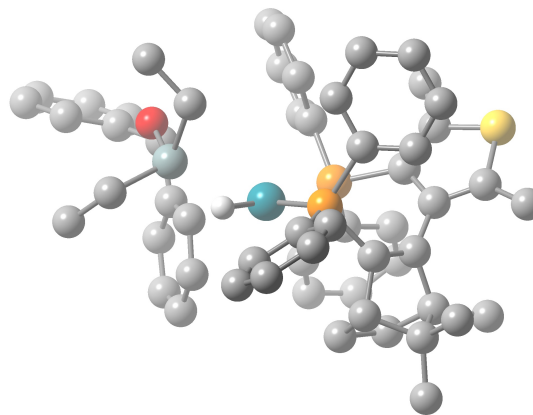

G = -3761.919328Hartree

ZPE<sub>H</sub> = -3761.806762 Hartree

ZPE<sub>D</sub> = -3761.80903 Hartree

|    |             |             |             |   |             |             |             |
|----|-------------|-------------|-------------|---|-------------|-------------|-------------|
| C  | 1.82849300  | 1.20289000  | -2.55916500 | C | -3.40612600 | 1.13830000  | 4.69621500  |
| C  | 4.07383200  | -0.44499800 | -2.35408500 | C | -2.09521900 | 1.52681400  | 4.41657900  |
| C  | 2.34880900  | 0.59057200  | -3.70547700 | C | -1.64889600 | 1.58978300  | 3.09539200  |
| H  | 1.00357800  | 1.90143600  | -2.66137300 | C | -2.94217900 | 0.46619800  | -0.77716900 |
| C  | 3.46809900  | -0.23567800 | -3.59787700 | C | -3.29085800 | 0.89635000  | -2.20345200 |
| H  | 4.98143500  | -1.03683700 | -2.28810900 | C | -4.57604000 | 0.05595500  | -2.47709600 |
| H  | 1.90101800  | 0.78195600  | -4.67685400 | C | -3.87712200 | -1.28226400 | -2.01776100 |
| H  | 3.89874600  | -0.68719500 | -4.48807000 | C | -3.27228700 | -0.84362900 | -0.65427300 |
| Si | 2.48153400  | 2.20728900  | 0.29964200  | C | -2.23132800 | 0.18961900  | -3.10975800 |
| C  | 4.18844200  | 0.10000600  | 0.17855600  | C | -2.62822600 | -1.30468800 | -2.97757400 |
| C  | 1.86085300  | 2.76661600  | 2.03337900  | C | -5.78728500 | 0.49785100  | -1.63847900 |
| C  | 2.96423900  | 3.34909600  | 2.93669300  | C | -5.03959300 | 0.06404900  | -3.94644700 |
| H  | 1.41795100  | 1.89745800  | 2.52934500  | C | -4.68193500 | -2.57325400 | -2.08421400 |
| H  | 1.05321700  | 3.49569000  | 1.89345200  | C | -2.98708500 | -1.75665900 | 0.48416800  |
| H  | 2.56082800  | 3.64653800  | 3.91325600  | C | -4.00983900 | -2.33929900 | 1.20399000  |
| H  | 3.75794400  | 2.61658800  | 3.10563900  | C | -1.73430000 | -3.05532100 | 2.01759600  |
| H  | 3.42748000  | 4.23946400  | 2.49740100  | C | -1.65816500 | -2.15134000 | 0.97354900  |
| C  | 3.01422900  | 3.84271900  | -0.54908800 | C | -5.49530700 | -2.13295400 | 1.12699100  |
| C  | 4.10673900  | 3.78336500  | -1.62776800 | C | -0.70679900 | -3.82143700 | 2.81157800  |
| H  | 2.10786700  | 4.30451400  | -0.96573000 | C | 0.18364000  | -2.80162100 | -1.12341800 |
| H  | 3.33903400  | 4.51684700  | 0.25469400  | C | 1.00276300  | -2.47490300 | -2.21329000 |
| H  | 3.78901700  | 3.19723400  | -2.49523800 | C | 1.25056600  | -3.40659600 | -3.22291900 |
| H  | 4.37007400  | 4.78606700  | -1.98615100 | C | 0.67500000  | -4.67629900 | -3.16364600 |
| H  | 5.02355600  | 3.32245900  | -1.24579200 | C | -0.14984800 | -5.01032400 | -2.08729300 |
| Rh | 0.26548100  | 0.88792800  | -0.22000000 | C | -0.39373200 | -4.08152000 | -1.07457400 |
| H  | 0.50225500  | 2.46368300  | -0.33127200 | C | 1.24243500  | -1.95089600 | 1.43305500  |
| O  | 3.82616400  | 1.28762500  | 0.85825400  | C | 1.34570700  | -1.15464500 | 2.58580000  |
| H  | 3.76318300  | -0.75518200 | 0.72433000  | C | 2.34743000  | -1.39036300 | 3.52713000  |
| C  | 5.69799600  | -0.08946600 | 0.15798400  | C | 3.27298200  | -2.41753800 | 3.32546400  |
| C  | 6.23706800  | -1.38000700 | 0.07253700  | C | 3.18848000  | -3.20440400 | 2.17616000  |
| C  | 6.57125900  | 1.00141000  | 0.22480700  | C | 2.18253400  | -2.97236400 | 1.23373400  |
| C  | 7.61839400  | -1.57662800 | 0.02418000  | P | -1.86302200 | 1.47243300  | 0.30681400  |
| H  | 5.56823100  | -2.23757000 | 0.05416400  | P | -0.07803600 | -1.52409400 | 0.20207700  |
| C  | 7.95274100  | 0.80707600  | 0.18350300  | S | -3.39180300 | -3.38026800 | 2.44319200  |
| H  | 6.15673700  | 1.99746100  | 0.33243900  | H | -4.15444900 | 3.19063200  | 1.20839500  |
| C  | 8.48186200  | -0.48087200 | 0.07670800  | H | -4.92397700 | 5.43592800  | 0.56761400  |
| H  | 8.01926500  | -2.58458400 | -0.04266100 | H | -3.65347200 | 6.77013700  | -1.10461100 |
| H  | 8.61849800  | 1.66426000  | 0.23961000  | H | -1.59252800 | 5.81770500  | -2.12544500 |
| H  | 9.55758700  | -0.63021600 | 0.04596000  | H | -0.81073800 | 3.56118600  | -1.46302700 |
| C  | -2.42867800 | 3.20348300  | -0.09560800 | H | -4.50393900 | 0.63963400  | 1.51785700  |
| C  | -3.59029200 | 3.75158100  | 0.47164600  | H | -5.29330000 | 0.52034300  | 3.85553400  |
| C  | -4.02698000 | 5.02709900  | 0.11062000  | H | -3.75337800 | 1.08459600  | 5.72412700  |
| C  | -3.31434200 | 5.77605900  | -0.82702400 | H | -1.41673100 | 1.78130300  | 5.22602600  |
| C  | -2.15922200 | 5.24186000  | -1.39901100 | H | -0.63077600 | 1.89768900  | 2.88351700  |
| C  | -1.71914800 | 3.96869800  | -1.03214600 | H | -3.37672900 | 1.97293300  | -2.36192500 |
| C  | -2.50758300 | 1.27085700  | 2.03263500  | H | -2.30211100 | 0.54246600  | -4.14367100 |
| C  | -3.82471300 | 0.88734200  | 2.32525300  | H | -1.21668800 | 0.39116300  | -2.75637700 |
| C  | -4.26988700 | 0.82034400  | 3.64677600  | H | -1.83102200 | -1.92626300 | -2.56980700 |



|   |             |             |             |
|---|-------------|-------------|-------------|
| H | -2.90491800 | -1.74041100 | -3.94341000 |
| H | -6.16524900 | 1.45852400  | -2.00593900 |
| H | -5.55040500 | 0.62542400  | -0.58186300 |
| H | -6.60882500 | -0.22295000 | -1.72431300 |
| H | -5.92240400 | -0.57338300 | -4.07000700 |
| H | -4.28658700 | -0.27811000 | -4.65672500 |
| H | -5.33163400 | 1.07909000  | -4.23902700 |
| H | -4.11967700 | -3.40940700 | -1.65629500 |
| H | -4.90278300 | -2.82481000 | -3.12697400 |
| H | -5.63572400 | -2.50829300 | -1.55476000 |
| H | -5.74559300 | -1.36264600 | 0.39888400  |
| H | -5.89271000 | -1.81501600 | 2.09788400  |
| H | -6.02354100 | -3.05088500 | 0.84483600  |
| H | 0.00891000  | -4.33150500 | 2.16423100  |
| H | -1.19973800 | -4.58068700 | 3.42557600  |
| H | -0.13431300 | -3.17192100 | 3.47839300  |
| H | 1.43949500  | -1.48711400 | -2.27819800 |
| H | 1.88897800  | -3.13107100 | -4.05730700 |
| H | 0.86203000  | -5.39947600 | -3.95259900 |
| H | -0.60719000 | -5.99462200 | -2.03544100 |
| H | -1.04583000 | -4.34956500 | -0.25016100 |
| H | 0.63532700  | -0.34920000 | 2.74336400  |
| H | 2.41206300  | -0.76434900 | 4.41232500  |
| H | 4.05872200  | -2.59583000 | 4.05363100  |
| H | 3.90650000  | -4.00262500 | 2.00889700  |
| H | 2.12862300  | -3.59529900 | 0.34729200  |

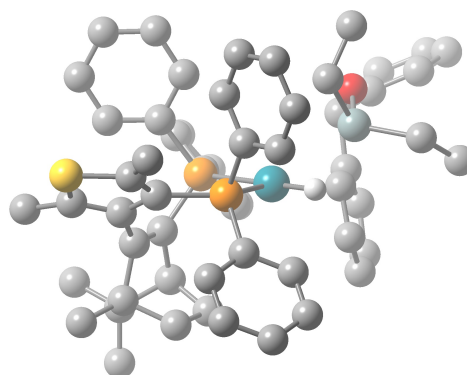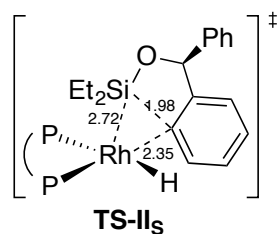

G = -3761.912689 Hartree

ZPE = -3761.802699 Hartree

|    |            |             |             |
|----|------------|-------------|-------------|
| C  | 2.44419500 | -0.70653200 | -1.41090100 |
| C  | 3.57875700 | 0.07776200  | -1.08229700 |
| C  | 1.95454600 | -0.63423000 | -2.73364900 |
| C  | 4.17415500 | 0.90798400  | -2.02968500 |
| C  | 2.51238500 | 0.25162800  | -3.66404700 |
| H  | 1.16265100 | -1.30165900 | -3.05387200 |
| C  | 3.62454700 | 1.01465100  | -3.31191700 |
| H  | 5.07182000 | 1.46250600  | -1.77595900 |
| H  | 2.10674200 | 0.30690800  | -4.67056500 |
| H  | 4.09256600 | 1.66554300  | -4.04607700 |
| Si | 2.51312400 | -2.23633900 | -0.14804300 |
| C  | 4.12215500 | -0.13728700 | 0.33259600  |
| C  | 5.62257200 | 0.06572200  | 0.47530300  |
| C  | 6.13303700 | 1.34638500  | 0.72471200  |
| C  | 6.51371000 | -1.00676800 | 0.36123900  |
| C  | 7.50948300 | 1.55598600  | 0.83076000  |
| H  | 5.44798200 | 2.18310600  | 0.84322700  |
| C  | 7.88911900 | -0.79982800 | 0.47369700  |
| H  | 6.11665900 | -2.00412600 | 0.20830200  |
| C  | 8.39264700 | 0.48249600  | 0.70309700  |
| H  | 7.89019500 | 2.55512500  | 1.02522300  |
| H  | 8.56931000 | -1.64294800 | 0.38714900  |
| H  | 9.46364700 | 0.64199200  | 0.79235900  |
| C  | 3.16966500 | -3.64405000 | -1.26265000 |
| C  | 4.29042300 | -3.33275300 | -2.26545500 |
| H  | 2.29567100 | -4.04767500 | -1.79518300 |
| H  | 3.49337500 | -4.44898300 | -0.58888500 |
| H  | 4.59808200 | -4.23134200 | -2.81381600 |
| H  | 3.97713400 | -2.58825700 | -3.00332900 |
| H  | 5.18042600 | -2.93635700 | -1.76555500 |
| C  | 2.58735400 | -3.87645400 | 2.22459200  |
| H  | 2.03062000 | -4.39695100 | 3.01369600  |
| H  | 3.19584700 | -4.62917700 | 1.71088700  |
| H  | 3.27425200 | -3.17095500 | 2.70017600  |
| Rh | 0.26656500 | -0.74560100 | -0.52697800 |

|   |             |             |             |   |             |             |             |
|---|-------------|-------------|-------------|---|-------------|-------------|-------------|
| H | 0.25027000  | -2.20781100 | -1.19324100 | S | -5.26351000 | 0.17987600  | 2.16471000  |
| O | 3.73532500  | -1.43888400 | 0.74605300  | H | 1.20943000  | 3.19237700  | 2.72303000  |
| H | 3.63105200  | 0.59757400  | 0.99181500  | H | 2.95564300  | 4.92188600  | 2.68910200  |
| H | 0.99721500  | -2.46050800 | 1.82751200  | H | 4.14724000  | 5.46498800  | 0.57232900  |
| C | 1.61973800  | -3.15755500 | 1.26330900  | H | 3.58845300  | 4.20920300  | -1.50552700 |
| H | 0.92546800  | -3.87662900 | 0.81639500  | H | 1.87459200  | 2.44421900  | -1.46286600 |
| C | 1.38708900  | 2.70125100  | 0.62460600  | H | -1.72074700 | 2.99765000  | 2.39593000  |
| C | 1.72149600  | 3.40598800  | 1.79212600  | H | -2.19478500 | 2.83028700  | 4.81715900  |
| C | 2.71225600  | 4.39018300  | 1.77334800  | H | -1.13706000 | 1.03663700  | 6.17480000  |
| C | 3.38235500  | 4.69357700  | 0.58746000  | H | 0.40739600  | -0.58478300 | 5.08790300  |
| C | 3.06575500  | 3.99324800  | -0.57818800 | H | 0.86076200  | -0.42644000 | 2.65787300  |
| C | 2.08716400  | 2.99851200  | -0.55580700 | H | -0.13869500 | 3.68700600  | -1.54314200 |
| C | -0.40711400 | 1.28902000  | 2.35303600  | H | -0.96229800 | 2.62949100  | -3.68531900 |
| C | -1.26278500 | 2.20681600  | 2.97953500  | H | -0.63142700 | 1.24971200  | -2.63167600 |
| C | -1.52708400 | 2.11347200  | 4.34678700  | H | -2.98353500 | 0.77395600  | -2.55583400 |
| C | -0.93151600 | 1.10713000  | 5.11040100  | H | -3.28207500 | 2.14600000  | -3.60741300 |
| C | -0.06741000 | 0.19609800  | 4.50057800  | H | -1.77895700 | 5.79008800  | -0.57729400 |
| C | 0.18968800  | 0.28447900  | 3.13048500  | H | -2.27809900 | 4.52855400  | 0.54569700  |
| C | -1.29956400 | 2.24515400  | -0.29654100 | H | -3.49127000 | 5.41740100  | -0.39488300 |
| C | -1.06661800 | 3.11552400  | -1.53473200 | H | -3.51209200 | 5.30996700  | -2.85938200 |
| C | -2.37478000 | 3.96017200  | -1.58226200 | H | -2.55911900 | 4.15524700  | -3.78964800 |
| C | -3.28235400 | 2.67868100  | -1.46463400 | H | -1.76493000 | 5.50724300  | -2.98295200 |
| C | -2.62457100 | 1.96664600  | -0.24583200 | H | -5.31558600 | 1.91965900  | -1.33707800 |
| C | -1.24847800 | 2.14473100  | -2.74651700 | H | -5.10864200 | 3.27830900  | -2.44503400 |
| C | -2.76831700 | 1.83497900  | -2.69159400 | H | -5.13965800 | 3.55857700  | -0.70356800 |
| C | -2.49077800 | 4.97042200  | -0.42809500 | H | -4.08052600 | 3.61345400  | 1.36035500  |
| C | -2.56312900 | 4.76249600  | -2.88412600 | H | -4.54199600 | 3.02688300  | 2.95895100  |
| C | -4.79272600 | 2.87068600  | -1.47873200 | H | -5.75514200 | 3.13962900  | 1.68158000  |
| C | -3.37372100 | 1.02900000  | 0.62949600  | H | -4.54479500 | -3.05757500 | 0.65053400  |
| C | -4.36621500 | 1.49037600  | 1.46835300  | H | -5.85381000 | -2.46595700 | 1.67627500  |
| C | -4.30640700 | -1.02425700 | 1.34547400  | H | -4.30195600 | -2.92896600 | 2.38821500  |
| C | -3.29108200 | -0.43742800 | 0.60821400  | H | -0.94432300 | -2.55305700 | -2.76210300 |
| C | -4.70693900 | 2.89177600  | 1.88312400  | H | -2.01994900 | -3.29686000 | -4.86621700 |
| C | -4.76991700 | -2.44725800 | 1.52464300  | H | -4.47942800 | -3.04898900 | -5.16496600 |
| C | -2.77647000 | -1.92021700 | -1.83303100 | H | -5.84322500 | -2.06645000 | -3.32988500 |
| C | -2.01841000 | -2.46244700 | -2.88412600 | H | -4.77160500 | -1.35067700 | -1.23265900 |
| C | -2.62743400 | -2.87543400 | -4.06999800 | H | -1.57065800 | -1.92057300 | 2.61297100  |
| C | -4.00621600 | -2.73713200 | -4.23815200 | H | -1.39567400 | -3.96231400 | 3.98095300  |
| C | -4.77016000 | -2.18680000 | -3.20887100 | H | -1.60511400 | -6.20601100 | 2.92024400  |
| C | -4.16267500 | -1.78495300 | -2.01747000 | H | -1.99476000 | -6.37014000 | 0.46784900  |
| C | -1.90834200 | -2.97322700 | 0.75581100  | H | -2.19388000 | -4.33121600 | -0.89953700 |
| C | -1.67247400 | -2.89154900 | 2.13750200  |   |             |             |             |
| C | -1.57196900 | -4.04679100 | 2.91204700  |   |             |             |             |
| C | -1.68765900 | -5.30602400 | 2.31774500  |   |             |             |             |
| C | -1.90511700 | -5.39689000 | 0.94271300  |   |             |             |             |
| C | -2.01610700 | -4.23991200 | 0.16684400  |   |             |             |             |
| P | 0.06868000  | 1.38443000  | 0.56893300  |   |             |             |             |
| P | -1.93553200 | -1.40692900 | -0.24454200 |   |             |             |             |

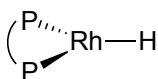

6

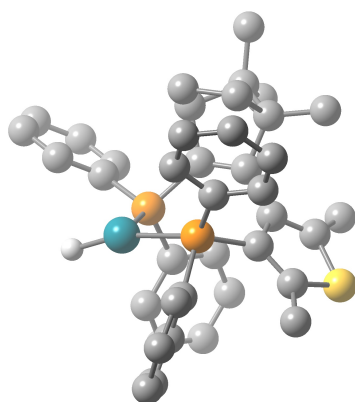

G = -2737.929422 Hartree  
 ZPE = -2737.842934 Hartree

|    |             |             |             |
|----|-------------|-------------|-------------|
| C  | 3.24728500  | -0.92176800 | -1.46401900 |
| C  | 4.47670800  | -0.86989800 | -0.78782000 |
| C  | 5.67731300  | -0.89671800 | -1.49792200 |
| C  | 5.66570000  | -0.97592400 | -2.89274200 |
| C  | 4.44869400  | -1.03349800 | -3.57266400 |
| C  | 3.24654900  | -1.01090100 | -2.86202800 |
| C  | 1.95406300  | -1.90273800 | 0.91802800  |
| C  | 2.50101900  | -1.41881600 | 2.11479900  |
| C  | 2.76088600  | -2.28380500 | 3.18053800  |
| C  | 2.47994400  | -3.64535100 | 3.06347500  |
| C  | 1.93510400  | -4.13803500 | 1.87532300  |
| C  | 1.66876400  | -3.27434900 | 0.81276000  |
| C  | 1.60186500  | 0.89846400  | 0.02997900  |
| C  | 2.29265300  | 2.02909000  | -0.73649000 |
| C  | 2.45712900  | 3.11125100  | 0.37340800  |
| C  | 0.93781200  | 3.01411900  | 0.78317200  |
| C  | 0.76799700  | 1.47469100  | 0.93355100  |
| C  | 1.17183800  | 2.64299100  | -1.63870900 |
| C  | 0.24415100  | 3.32128200  | -0.59572400 |
| C  | 3.46539700  | 2.72784700  | 1.46998000  |
| C  | 2.89450000  | 4.49334900  | -0.14963100 |
| C  | 0.44025000  | 3.91088400  | 1.90846300  |
| C  | -0.27955000 | 0.85809500  | 1.79548300  |
| C  | -0.19176300 | 0.88194700  | 3.17007600  |
| C  | -2.39541300 | -0.04684300 | 2.36936300  |
| C  | -1.54954700 | 0.28270400  | 1.33066800  |
| C  | 0.94519600  | 1.29767400  | 4.05704400  |
| C  | -3.79254700 | -0.60628000 | 2.39445200  |
| C  | -2.82480600 | 1.36118400  | -1.06963900 |
| C  | -2.81180700 | 1.60529800  | -2.45245500 |
| C  | -3.52795900 | 2.67330300  | -2.99456300 |
| C  | -4.25596600 | 3.52219800  | -2.15817500 |
| C  | -4.26562800 | 3.29730400  | -0.77991700 |
| C  | -3.55673000 | 2.22319100  | -0.23865400 |
| C  | -3.10070000 | -1.46787900 | -0.50147400 |
| C  | -2.69019500 | -2.73482000 | -0.04032800 |
| C  | -3.53267600 | -3.84123900 | -0.16116000 |
| C  | -4.78785800 | -3.70780300 | -0.75877100 |
| C  | -5.19633700 | -2.46057700 | -1.23421300 |
| C  | -4.36097100 | -1.34852200 | -1.10828000 |
| P  | 1.62588900  | -0.83579000 | -0.56366900 |
| P  | -1.85474100 | -0.09273700 | -0.45201400 |
| S  | -1.63815700 | 0.26107900  | 3.91004800  |
| Rh | -0.20408600 | -1.33676700 | -1.63427600 |
| H  | 4.50146300  | -0.82140200 | 0.29658200  |
| H  | 6.62176600  | -0.86142500 | -0.96167400 |
| H  | 6.60150800  | -0.99995800 | -3.44439300 |
| H  | 4.43226200  | -1.10447800 | -4.65674900 |
| H  | 2.29375700  | -1.08017200 | -3.37861700 |
| H  | 2.71706500  | -0.36193800 | 2.21979700  |
| H  | 3.18382300  | -1.89155600 | 4.10169800  |
| H  | 2.68093200  | -4.31764800 | 3.89290900  |
| H  | 1.71155400  | -5.19677500 | 1.77656900  |
| H  | 1.23081500  | -3.65001300 | -0.10732500 |
| H  | 3.19961700  | 1.74644200  | -1.27255000 |
| H  | 1.58942200  | 3.36484400  | -2.34746100 |
| H  | 0.66315600  | 1.86647800  | -2.21556700 |
| H  | -0.77660500 | 2.93970500  | -0.61717500 |
| H  | 0.17849500  | 4.40350900  | -0.75044900 |
| H  | 4.48510100  | 2.76238400  | 1.07030700  |
| H  | 3.30483500  | 1.72490700  | 1.86571300  |
| H  | 3.42387300  | 3.43675400  | 2.30507200  |
| H  | 2.93394600  | 5.21655000  | 0.67284200  |
| H  | 2.24513300  | 4.90818900  | -0.92077400 |
| H  | 3.90442500  | 4.42860400  | -0.57042400 |
| H  | -0.61476000 | 3.71957500  | 2.12867400  |
| H  | 0.53064900  | 4.96374900  | 1.62028400  |
| H  | 1.00177900  | 3.77424400  | 2.83673900  |
| H  | 1.77812100  | 1.67460700  | 3.46392000  |
| H  | 1.31208600  | 0.44692800  | 4.64312500  |
| H  | 0.64946600  | 2.08035800  | 4.76484600  |
| H  | -4.38858000 | -0.23352700 | 1.56029900  |
| H  | -4.29849000 | -0.32342900 | 3.32249900  |
| H  | -3.79545600 | -1.69966100 | 2.33145800  |
| H  | -2.22419800 | 0.95899700  | -3.10023700 |
| H  | -3.50774800 | 2.84881600  | -4.06647700 |
| H  | -4.80649500 | 4.35974800  | -2.57719400 |
| H  | -4.82426200 | 3.95968800  | -0.12429600 |
| H  | -3.55742300 | 2.06421600  | 0.83539500  |
| H  | -1.70993000 | -2.84562500 | 0.41415500  |

|   |             |             |             |
|---|-------------|-------------|-------------|
| H | -3.20325900 | -4.80892400 | 0.20668800  |
| H | -5.44060300 | -4.57044900 | -0.85751100 |
| H | -6.16991200 | -2.34907000 | -1.70370900 |
| H | -4.69579200 | -0.38542500 | -1.47900300 |
| H | 0.70343600  | -2.48928400 | -2.27220400 |

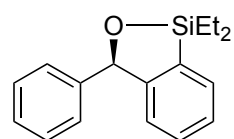

**3a**

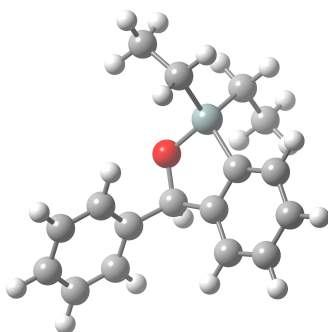

G = -1024.000594 Hartree

ZPE = -1023.945505 Hartree

|   |             |             |             |
|---|-------------|-------------|-------------|
| C | -0.00204300 | 3.52844400  | 0.67948300  |
| C | 0.62678400  | 2.49646300  | -0.01638200 |
| C | -0.01585600 | 1.26211400  | -0.14254000 |
| C | -1.28503700 | 1.05133900  | 0.42725000  |
| C | -1.90119300 | 2.09879900  | 1.12545200  |
| C | -1.26414600 | 3.33304100  | 1.25045400  |
| H | 0.49470900  | 4.48920300  | 0.78214900  |
| H | 1.61313700  | 2.64906300  | -0.44603100 |
| H | -2.88103300 | 1.95738000  | 1.57611100  |
| H | -1.74459500 | 4.14242700  | 1.79281000  |
| O | -0.31704000 | -1.04996000 | -0.75335200 |
| C | 1.98035500  | -0.28934900 | -0.49898400 |
| C | 2.22965500  | -0.99872800 | 0.68205100  |
| C | 3.06382300  | 0.11445600  | -1.28536600 |
| C | 3.53578300  | -1.29036100 | 1.06960800  |
| H | 1.39430100  | -1.33388600 | 1.28831300  |
| C | 4.37481300  | -0.16932200 | -0.89540400 |
| H | 2.88149600  | 0.64650000  | -2.21624500 |
| C | 4.61377500  | -0.87284200 | 0.28418200  |
| H | 3.71494800  | -1.84583100 | 1.98592000  |
| H | 5.20501500  | 0.14986800  | -1.51903700 |
| H | 5.63124900  | -1.10162400 | 0.58763600  |

|    |             |             |             |
|----|-------------|-------------|-------------|
| Si | -1.77027300 | -0.71631700 | 0.04228400  |
| C  | -1.97080600 | -1.83821300 | 1.54999000  |
| H  | -2.90633200 | -1.56949800 | 2.06101400  |
| H  | -1.16669300 | -1.59587500 | 2.25662600  |
| C  | -1.95706200 | -3.34635700 | 1.23688500  |
| H  | -2.05092300 | -3.94627900 | 2.14877000  |
| H  | -2.78247500 | -3.62967600 | 0.57511600  |
| H  | -1.02525000 | -3.63814200 | 0.74220000  |
| C  | -3.24293500 | -0.90676900 | -1.12671200 |
| H  | -4.15435900 | -0.63788800 | -0.57322700 |
| H  | -3.35249200 | -1.97254900 | -1.36868500 |
| C  | -3.14555800 | -0.08337000 | -2.42217300 |
| H  | -4.02150600 | -0.23330400 | -3.06267700 |
| H  | -3.07064900 | 0.98815500  | -2.20950400 |
| H  | -2.26042300 | -0.36624200 | -3.00095900 |
| C  | 0.56225700  | 0.06847800  | -0.91473800 |
| H  | 0.58636000  | 0.32935400  | -1.98379500 |

Structures computed with the M06 functional:

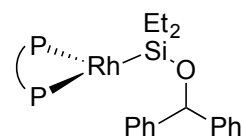

**8a**

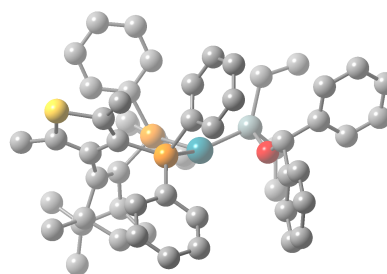

G = -3761.935759 Hartree

ZPE = - 3761.827449 Hartree

|   |            |             |             |
|---|------------|-------------|-------------|
| C | 3.56644400 | -1.13656100 | -2.46435300 |
| C | 3.95876500 | -1.18924900 | -1.12778900 |
| C | 3.84775200 | -2.19924300 | -3.32125300 |
| C | 4.63461000 | -2.31924300 | -0.66203100 |
| C | 4.51292800 | -3.32537000 | -2.84897200 |
| H | 3.53634800 | -2.14693100 | -4.36282500 |
| C | 4.90339800 | -3.38368600 | -1.51215000 |
| H | 4.95234200 | -2.35556900 | 0.38053700  |
| H | 4.72871000 | -4.15584400 | -3.51809300 |

|    |             |             |             |   |             |             |             |
|----|-------------|-------------|-------------|---|-------------|-------------|-------------|
| H  | 5.42488300  | -4.26062600 | -1.13451400 | C | -3.31976600 | -0.53325200 | -0.52994500 |
| Si | 1.95982300  | 2.25558600  | -0.23701300 | C | -2.10902200 | 0.01103500  | -3.03785700 |
| C  | 3.68292200  | -0.03936800 | -0.17854900 | C | -2.70290300 | -1.37509300 | -2.71916500 |
| C  | 2.59989100  | 2.84522100  | 1.45122300  | C | -5.58020000 | 0.98264100  | -1.74500900 |
| C  | 3.78719900  | 3.80421100  | 1.43400700  | C | -4.88081100 | 0.14607000  | -3.93309000 |
| H  | 2.83172500  | 1.94250200  | 2.03858500  | C | -4.90648000 | -2.22178600 | -1.74394800 |
| H  | 1.74618100  | 3.31670200  | 1.96203800  | C | -3.16132400 | -1.33483800 | 0.69945100  |
| H  | 4.13660100  | 4.04029800  | 2.44710900  | C | -4.23392000 | -1.66060100 | 1.49405100  |
| H  | 4.63945500  | 3.38428200  | 0.88543100  | C | -2.07562400 | -2.61085200 | 2.35423800  |
| H  | 3.52325300  | 4.75310800  | 0.95080900  | C | -1.90934500 | -1.86844100 | 1.20891300  |
| C  | 2.38616400  | 3.54923000  | -1.55771500 | C | -5.65848400 | -1.23292500 | 1.39224800  |
| C  | 2.22874000  | 3.02895500  | -2.98308200 | C | -1.11968800 | -3.43704400 | 3.15448000  |
| H  | 1.76520400  | 4.44232900  | -1.38855400 | C | -0.20940500 | -3.16346500 | -0.66433000 |
| H  | 3.42623000  | 3.86660500  | -1.38772100 | C | 0.79925700  | -3.23129900 | -1.63053100 |
| H  | 1.24169300  | 2.57264100  | -3.14889800 | C | 0.93098100  | -4.35099200 | -2.44290900 |
| H  | 2.36534800  | 3.81554400  | -3.73558800 | C | 0.03076300  | -5.40626800 | -2.32236100 |
| H  | 2.96693700  | 2.24322100  | -3.18425600 | C | -0.99032900 | -5.33952000 | -1.37950200 |
| Rh | 0.37778000  | 0.61417300  | -0.34449400 | C | -1.10823400 | -4.22842100 | -0.54920500 |
| H  | 3.01722600  | -0.26596600 | -2.81694400 | C | 0.96662600  | -1.84295800 | 1.62483900  |
| O  | 2.80224000  | 0.85777400  | -0.81162200 | C | 1.01297800  | -0.90464200 | 2.66704700  |
| H  | 3.21959900  | -0.45549800 | 0.73706400  | C | 1.99989700  | -0.97739000 | 3.64269400  |
| C  | 4.97469700  | 0.64391100  | 0.21519000  | C | 2.96956200  | -1.97854400 | 3.58611500  |
| C  | 5.47605200  | 0.53491400  | 1.51002400  | C | 2.94154200  | -2.90057700 | 2.54563900  |
| C  | 5.68534000  | 1.38163100  | -0.73408500 | C | 1.94939000  | -2.83304300 | 1.56874300  |
| C  | 6.67308000  | 1.15721200  | 1.85655200  | P | -1.53608700 | 1.62840700  | 0.09228000  |
| H  | 4.91566900  | -0.03643800 | 2.25213000  | P | -0.31918600 | -1.61011400 | 0.32234100  |
| C  | 6.87617400  | 2.00760100  | -0.38857800 | S | -3.74113300 | -2.61404600 | 2.85307100  |
| H  | 5.28837900  | 1.45631400  | -1.74674800 | H | -3.64417400 | 3.64820500  | 0.77253700  |
| C  | 7.37341400  | 1.89528300  | 0.90912700  | H | -4.17244300 | 5.86846600  | -0.17485100 |
| H  | 7.05607400  | 1.06941700  | 2.87101400  | H | -2.75535100 | 6.83248800  | -1.96840600 |
| H  | 7.42313200  | 2.58184900  | -1.13318400 | H | -0.80530000 | 5.54573700  | -2.83005900 |
| H  | 8.30642500  | 2.38477800  | 1.17928200  | H | -0.29275500 | 3.30388500  | -1.87626500 |
| C  | -1.91916400 | 3.33860100  | -0.48949400 | H | -4.14263200 | 1.16409900  | 1.52841700  |
| C  | -3.02009300 | 4.06039700  | -0.01972400 | H | -4.75626300 | 1.32519800  | 3.92108200  |
| C  | -3.31718000 | 5.31108200  | -0.55109900 | H | -3.05130400 | 1.96954500  | 5.60421100  |
| C  | -2.52251500 | 5.85178800  | -1.55918500 | H | -0.72634900 | 2.46721600  | 4.87853900  |
| C  | -1.43188000 | 5.13492500  | -2.04021200 | H | -0.10846900 | 2.26840500  | 2.48343000  |
| C  | -1.13655800 | 3.88470600  | -1.50600200 | H | -3.02078100 | 2.01291300  | -2.58382600 |
| C  | -2.08420500 | 1.70873000  | 1.84660400  | H | -2.11072400 | 0.22360700  | -4.11380900 |
| C  | -3.39160300 | 1.44790800  | 2.26325800  | H | -1.07694400 | 0.13101500  | -2.67352500 |
| C  | -3.73559100 | 1.53853000  | 3.60889800  | H | -2.00730400 | -2.03876400 | -2.19233700 |
| C  | -2.78072000 | 1.90289400  | 4.55286500  | H | -3.01377300 | -1.91235100 | -3.62519700 |
| C  | -1.47816600 | 2.17872600  | 4.14696900  | H | -5.81559600 | 1.92509300  | -2.25703000 |
| C  | -1.13303400 | 2.07659500  | 2.80404900  | H | -5.34067600 | 1.23047900  | -0.70666900 |
| C  | -2.80396800 | 0.68556600  | -0.80957700 | H | -6.49593600 | 0.37484800  | -1.75484100 |
| C  | -3.07400200 | 0.95979000  | -2.27914900 | H | -5.86018300 | -0.34710100 | -3.99394700 |
| C  | -4.44367600 | 0.27258400  | -2.47535500 | H | -4.19041200 | -0.41583000 | -4.56716200 |
| C  | -3.94804300 | -1.05774400 | -1.83014200 | H | -4.99465000 | 1.14549800  | -4.37378500 |

|   |             |             |             |    |            |             |             |
|---|-------------|-------------|-------------|----|------------|-------------|-------------|
| H | -4.42917000 | -3.07842600 | -1.24845800 | C  | 4.02912600 | -1.18960200 | -3.46619800 |
| H | -5.20128200 | -2.54647600 | -2.75016100 | H  | 5.38309800 | -0.75345900 | -1.85638200 |
| H | -5.82169500 | -1.98323700 | -1.18949700 | H  | 2.45656100 | -1.45606200 | -4.91770200 |
| H | -5.79229000 | -0.53234600 | 0.56266200  | H  | 4.79725500 | -1.65734600 | -4.07860000 |
| H | -5.98692000 | -0.72761000 | 2.31045200  | Si | 1.78619600 | 2.40918800  | 0.14890900  |
| H | -6.33589900 | -2.08136500 | 1.23085800  | C  | 3.75657000 | 0.55516000  | -0.05862500 |
| H | -0.47958000 | -4.04160000 | 2.50231800  | C  | 1.56185000 | 2.70360300  | 2.01288800  |
| H | -1.66261200 | -4.11960600 | 3.81676300  | C  | 2.56507000 | 3.71467600  | 2.56387200  |
| H | -0.45677100 | -2.82196900 | 3.77542600  | H  | 1.68146600 | 1.73427600  | 2.52152100  |
| H | 1.49121800  | -2.39603300 | -1.74303500 | H  | 0.52879000 | 3.03355700  | 2.20386300  |
| H | 1.73681400  | -4.38586700 | -3.17394600 | H  | 2.49156200 | 3.81852500  | 3.65382000  |
| H | 0.11980600  | -6.27747500 | -2.96765200 | H  | 3.59303600 | 3.41455700  | 2.32555400  |
| H | -1.70105300 | -6.15814100 | -1.28679900 | H  | 2.40677900 | 4.71068200  | 2.13189000  |
| H | -1.91503500 | -4.17993300 | 0.18231300  | C  | 1.78010400 | 4.09085900  | -0.71025200 |
| H | 0.25303400  | -0.12540800 | 2.72035800  | C  | 1.97811900 | 4.02830500  | -2.21940100 |
| H | 2.01150500  | -0.24870900 | 4.45103900  | H  | 0.85854900 | 4.63382500  | -0.45312100 |
| H | 3.74085600  | -2.03883300 | 4.35102400  | H  | 2.60718600 | 4.65369800  | -0.25036200 |
| H | 3.69383400  | -3.68534700 | 2.49040000  | H  | 1.14413200 | 3.51017100  | -2.71266900 |
| H | 1.94175400  | -3.56478100 | 0.76247700  | H  | 2.05321500 | 5.02600200  | -2.67068800 |

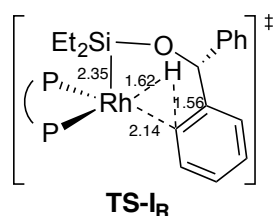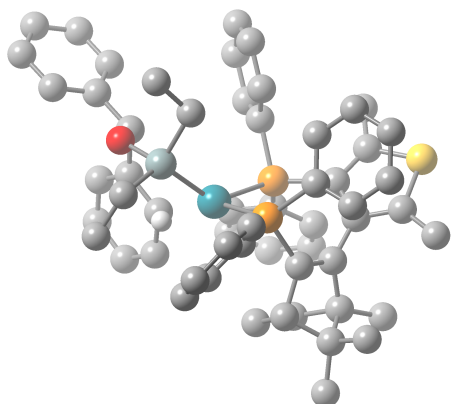

G = - 3761.920819 Hartree

ZPE = - 3761.815974 Hartree

|   |            |             |             |   |             |            |             |
|---|------------|-------------|-------------|---|-------------|------------|-------------|
| C | 2.05879000 | 0.00917600  | -1.85367800 | C | -3.74888600 | 1.71593300 | 1.96110900  |
| C | 3.39595400 | -0.06498200 | -1.40723700 | C | -4.39617000 | 1.66552700 | 3.18886800  |
| C | 1.75754300 | -0.47450400 | -3.13423100 | C | -3.67226700 | 1.39248000 | 4.34827900  |
| C | 4.35710300 | -0.67911100 | -2.21243800 | C | -2.29823500 | 1.20059600 | 4.27511300  |
| C | 2.72641700 | -1.07262300 | -3.93505900 | C | -1.65116900 | 1.26343200 | 3.04253800  |
| H | 0.73436800 | -0.41068300 | -3.50516100 | C | -2.71219300 | 0.57535900 | -0.77598500 |



|    |             |             |             |   |             |             |             |
|----|-------------|-------------|-------------|---|-------------|-------------|-------------|
| C  | 4.30580100  | 0.05403900  | -2.53170200 | C | 1.07894000  | 1.03598000  | 4.65285800  |
| C  | 2.66267400  | 0.38507300  | -4.25371400 | C | 1.17637000  | 0.99791900  | 3.26868400  |
| H  | 0.66216800  | -0.21858500 | -3.76714100 | C | -0.99024400 | 2.25011600  | -0.15421600 |
| C  | 3.97971200  | 0.47646700  | -3.81764900 | C | -0.77787000 | 3.12173000  | -1.38287100 |
| H  | 5.33603200  | 0.12611200  | -2.18586000 | C | -2.06114400 | 3.97960100  | -1.38099900 |
| H  | 2.39457200  | 0.69135600  | -5.26330700 | C | -2.98002800 | 2.72536800  | -1.26285300 |
| H  | 4.75486000  | 0.85723600  | -4.47916000 | C | -2.31739800 | 1.98425400  | -0.08137300 |
| Si | 1.53944100  | -2.34335800 | 0.41296000  | C | -1.00585300 | 2.16768600  | -2.58169000 |
| C  | 3.64938300  | -0.83006800 | -0.23737000 | C | -2.52058200 | 1.90465400  | -2.50650000 |
| C  | 5.10280300  | -0.74257600 | 0.13996200  | C | -2.10792100 | 4.96310600  | -0.21449700 |
| C  | 5.60048800  | 0.44853900  | 0.66920400  | C | -2.27022600 | 4.80557200  | -2.64883000 |
| C  | 5.96911200  | -1.81565800 | -0.06178600 | C | -4.47753600 | 2.92377600  | -1.24292500 |
| C  | 6.94956700  | 0.57062700  | 0.98573600  | C | -3.09392900 | 1.09021400  | 0.80766000  |
| H  | 4.91745900  | 1.28599600  | 0.82995500  | C | -4.02460600 | 1.61235000  | 1.67598200  |
| C  | 7.31733500  | -1.69536400 | 0.25754000  | C | -4.11420700 | -0.89068600 | 1.57397400  |
| H  | 5.56996600  | -2.74419000 | -0.46380000 | C | -3.10833200 | -0.36682600 | 0.78882100  |
| C  | 7.81121600  | -0.50246700 | 0.77924600  | C | -4.28344900 | 3.02507100  | 2.07812900  |
| H  | 7.32727400  | 1.50324200  | 1.39972000  | C | -4.65342900 | -2.27370300 | 1.77140700  |
| H  | 7.98794200  | -2.53756500 | 0.09964600  | C | -2.79869900 | -1.58000900 | -1.77707000 |
| H  | 8.86601800  | -0.41173900 | 1.02976500  | C | -2.08216200 | -1.91265600 | -2.93181500 |
| C  | 1.26730900  | -4.15185600 | -0.04984300 | C | -2.72829300 | -2.03122000 | -4.15845900 |
| C  | 1.27473100  | -4.46910600 | -1.53724400 | C | -4.09885700 | -1.80857000 | -4.24836900 |
| H  | 0.35379600  | -4.52815800 | 0.42924100  | C | -4.82249200 | -1.48195300 | -3.10550600 |
| H  | 2.10770900  | -4.66062400 | 0.45278400  | C | -4.17847900 | -1.37157300 | -1.87741100 |
| H  | 1.26716700  | -5.54918500 | -1.72992500 | C | -2.00427000 | -3.01670500 | 0.59541800  |
| H  | 0.39383000  | -4.04091100 | -2.03429000 | C | -1.65541800 | -3.14050900 | 1.94385200  |
| H  | 2.16070500  | -4.04912700 | -2.03138300 | C | -1.67510200 | -4.38142000 | 2.56946000  |
| C  | 2.82767000  | -2.03886600 | 2.95454100  | C | -2.03274100 | -5.51978600 | 1.85086600  |
| H  | 2.75105000  | -1.92478600 | 4.04451600  | C | -2.36330100 | -5.40801200 | 0.50393400  |
| H  | 3.47086600  | -2.90307600 | 2.74954800  | C | -2.34618100 | -4.16478600 | -0.12264500 |
| H  | 3.37017700  | -1.16591300 | 2.56692500  | P | 0.41885000  | 1.41631200  | 0.64964000  |
| Rh | 0.36710300  | -0.65980700 | -0.68609000 | P | -1.87984400 | -1.35737700 | -0.18617700 |
| H  | 1.04915000  | -1.63245700 | -1.82375800 | S | -4.95659400 | 0.36627200  | 2.42827500  |
| O  | 3.15644800  | -2.13195800 | -0.00014900 | H | 1.58415600  | 3.61226900  | 2.35513800  |
| H  | 3.10813900  | -0.10177000 | 0.40402400  | H | 3.46142300  | 5.16776200  | 1.98845900  |
| H  | 0.78577500  | -1.38253000 | 2.61215700  | H | 4.75303200  | 5.09717100  | -0.13146100 |
| C  | 1.45218500  | -2.20082700 | 2.31192200  | H | 4.12371800  | 3.45774700  | -1.90218100 |
| H  | 0.98227100  | -3.12854500 | 2.67043900  | H | 2.25039200  | 1.91056500  | -1.54147400 |
| C  | 1.78551100  | 2.64313800  | 0.43590400  | H | -1.72149500 | 2.56203900  | 2.46284600  |
| C  | 2.13835000  | 3.57443600  | 1.41877000  | H | -1.91807700 | 2.60628600  | 4.92791300  |
| C  | 3.19849100  | 4.45164300  | 1.21270200  | H | -0.12833900 | 1.62427800  | 6.33920300  |
| C  | 3.91994600  | 4.41493700  | 0.02274200  | H | 1.88056800  | 0.62001600  | 5.25982500  |
| C  | 3.56828000  | 3.50340400  | -0.96765100 | H | 2.06368400  | 0.56670700  | 2.80344400  |
| C  | 2.50997000  | 2.62446100  | -0.76194000 | H | 0.16512200  | 3.67919700  | -1.41017300 |
| C  | 0.16067900  | 1.52612600  | 2.46185300  | H | -0.70503700 | 2.63108100  | -3.52969300 |
| C  | -0.94269300 | 2.11796400  | 3.07482700  | H | -0.40757500 | 1.25201500  | -2.47471800 |
| C  | -1.04767900 | 2.14614700  | 4.46363400  | H | -2.77726300 | 0.84636600  | -2.39592800 |
| C  | -0.04302300 | 1.60138600  | 5.25523900  | H | -3.04518700 | 2.25697700  | -3.40414100 |



|   |             |             |             |    |            |             |             |
|---|-------------|-------------|-------------|----|------------|-------------|-------------|
| H | -1.41566900 | 5.79303900  | -0.40689100 | C  | 1.64496500 | -0.39206100 | -3.06995300 |
| H | -1.81255600 | 4.51605400  | 0.73978800  | C  | 4.29608900 | -0.49681900 | -2.30244000 |
| H | -3.10909800 | 5.40320300  | -0.10425700 | C  | 2.60450100 | -0.86891700 | -3.96153500 |
| H | -3.19467400 | 5.39313700  | -2.56920300 | H  | 0.60473200 | -0.38558800 | -3.39610800 |
| H | -2.33180800 | 4.22257900  | -3.57108200 | C  | 3.93665900 | -0.93513400 | -3.57343800 |
| H | -1.44459500 | 5.51986500  | -2.76632600 | H  | 5.34222100 | -0.52804200 | -2.00102800 |
| H | -4.99427100 | 1.95899000  | -1.14563900 | H  | 2.30354000 | -1.19807300 | -4.95537800 |
| H | -4.80767000 | 3.37895800  | -2.18565200 | H  | 4.69630100 | -1.30914800 | -4.25702700 |
| H | -4.81800300 | 3.56997000  | -0.42623600 | Si | 1.85041500 | 2.53405400  | -0.03519200 |
| H | -3.62007100 | 3.71400100  | 1.54888700  | C  | 3.73192800 | 0.57113400  | -0.06068900 |
| H | -4.11379400 | 3.16436200  | 3.15469400  | C  | 1.44547100 | 2.99624600  | 1.75862400  |
| H | -5.31900800 | 3.32744300  | 1.87609100  | C  | 2.36383500 | 4.08910300  | 2.30268300  |
| H | -4.56062400 | -2.87865000 | 0.86535200  | H  | 1.55138900 | 2.08012100  | 2.35966800  |
| H | -5.71645000 | -2.22525500 | 2.03271800  | H  | 0.39192800 | 3.30610300  | 1.82907500  |
| H | -4.13930400 | -2.81664700 | 2.57340600  | H  | 2.19351400 | 4.27193900  | 3.37109400  |
| H | -1.00258500 | -2.05402800 | -2.85637700 | H  | 3.41982800 | 3.81961500  | 2.17811600  |
| H | -2.15560800 | -2.28746500 | -5.04714000 | H  | 2.20379300 | 5.04129900  | 1.78295000  |
| H | -4.60227200 | -1.88612400 | -5.20951300 | C  | 2.01947500 | 4.13000100  | -1.03292600 |
| H | -5.89394000 | -1.30527100 | -3.17030400 | C  | 2.30416500 | 3.88455700  | -2.51089500 |
| H | -4.75000700 | -1.08762300 | -0.99449900 | H  | 1.11372200 | 4.74261600  | -0.89892000 |
| H | -1.38286000 | -2.25141400 | 2.51419900  | H  | 2.84741600 | 4.69621300  | -0.58064900 |
| H | -1.40721300 | -4.45884700 | 3.62136000  | H  | 1.47054800 | 3.36346800  | -3.00304000 |
| H | -2.04818900 | -6.49162700 | 2.33854500  | H  | 2.47917200 | 4.81651900  | -3.06244500 |
| H | -2.63829900 | -6.29307100 | -0.06553200 | H  | 3.18939700 | 3.24828900  | -2.63897600 |
| H | -2.61530300 | -4.08731400 | -1.17493000 | Rh | 0.40679700 | 0.67986500  | -0.56032400 |

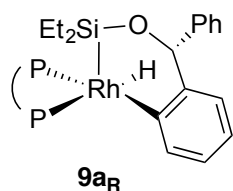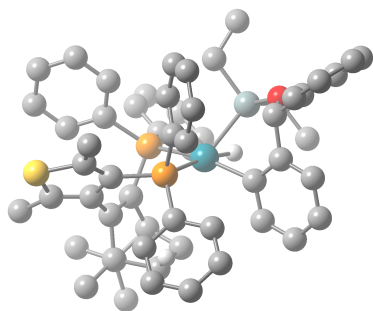

G = -3761.936275 Hartree

ZPE = -3761.828734 Hartree

|   |            |             |             |   |             |            |            |
|---|------------|-------------|-------------|---|-------------|------------|------------|
| C | 1.97591400 | 0.03067300  | -1.77528200 | C | -2.38266400 | 1.22881700 | 1.99495000 |
| C | 3.33607700 | -0.01057700 | -1.41046200 | C | -3.75010800 | 1.03056100 | 2.20969500 |
|   |            |             |             | C | -4.25038100 | 0.88437700 | 3.49816500 |

|   |             |             |             |   |             |             |             |
|---|-------------|-------------|-------------|---|-------------|-------------|-------------|
| C | -3.39048700 | 0.93545700  | 4.59283100  | H | -2.54931400 | -1.74735500 | -3.85668200 |
| C | -2.03251200 | 1.15347800  | 4.39305100  | H | -6.02623000 | 1.28369500  | -2.08862800 |
| C | -1.53542000 | 1.30284400  | 3.10136000  | H | -5.38137800 | 0.57028900  | -0.61131300 |
| C | -2.77470900 | 0.51003300  | -0.76997600 | H | -6.36590000 | -0.40871600 | -1.72497300 |
| C | -3.13999300 | 0.89397800  | -2.19303900 | H | -5.68009900 | -0.70869600 | -4.03363600 |
| C | -4.35347000 | -0.02531400 | -2.46298200 | H | -4.03517000 | -0.45088900 | -4.61929200 |
| C | -3.59046900 | -1.29647500 | -1.97241700 | H | -5.07254900 | 0.93358000  | -4.26148900 |
| C | -3.04528800 | -0.80693900 | -0.62214900 | H | -3.64843300 | -3.43539500 | -1.67530800 |
| C | -2.04172800 | 0.24978100  | -3.07192200 | H | -4.59500600 | -2.86363000 | -3.05331700 |
| C | -2.32981600 | -1.25614100 | -2.89971400 | H | -5.21259000 | -2.64876400 | -1.40636400 |
| C | -5.59176200 | 0.36889300  | -1.66491600 | H | -5.52824500 | -1.30731400 | 0.33296600  |
| C | -4.79091500 | -0.07361900 | -3.92630800 | H | -5.69517800 | -1.48610200 | 2.08265100  |
| C | -4.30548800 | -2.62628000 | -2.02153700 | H | -5.82668500 | -2.90484600 | 1.03658500  |
| C | -2.77891500 | -1.65916900 | 0.55858900  | H | 0.06369200  | -4.22942800 | 2.37428000  |
| C | -3.81972100 | -2.16665600 | 1.30007000  | H | -1.08038700 | -4.27554500 | 3.71956900  |
| C | -1.58351100 | -2.85697200 | 2.20113500  | H | 0.07956800  | -2.94615400 | 3.58700700  |
| C | -1.47894500 | -2.04836400 | 1.09167700  | H | 2.30519600  | -2.46471300 | -1.48953900 |
| C | -5.29045700 | -1.95763200 | 1.17720600  | H | 2.57464400  | -4.31687300 | -3.07502100 |
| C | -0.57616800 | -3.60919600 | 3.01190400  | H | 0.76189200  | -6.00148000 | -3.36377600 |
| C | 0.32699400  | -3.06165600 | -0.85087900 | H | -1.31768600 | -5.80848100 | -2.01508200 |
| C | 1.50173000  | -3.18926100 | -1.60434900 | H | -1.59210800 | -3.95752800 | -0.41736500 |
| C | 1.65647100  | -4.24476500 | -2.49609200 | H | 0.74295100  | -0.09245600 | 2.58024500  |
| C | 0.64246700  | -5.18375300 | -2.65651800 | H | 2.45231700  | -0.25236100 | 4.36554800  |
| C | -0.52285200 | -5.07357600 | -1.90535500 | H | 4.09295300  | -2.12509300 | 4.34359200  |
| C | -0.67716000 | -4.02496600 | -1.00429600 | H | 3.99367000  | -3.82144800 | 2.53520000  |
| C | 1.39398000  | -1.86105000 | 1.55462400  | H | 2.28486000  | -3.66169200 | 0.76713900  |
| C | 1.45940900  | -0.91105600 | 2.57824100  |   |             |             |             |
| C | 2.41661500  | -1.00444900 | 3.58026400  |   |             |             |             |
| C | 3.33411600  | -2.05269500 | 3.56836000  |   |             |             |             |
| C | 3.27969200  | -3.00057300 | 2.55273100  |   |             |             |             |
| C | 2.31968000  | -2.90513000 | 1.54777000  |   |             |             |             |
| P | -1.67276500 | 1.47566900  | 0.31311400  |   |             |             |             |
| P | 0.10714100  | -1.60982900 | 0.26324900  |   |             |             |             |
| S | -3.24463000 | -3.10225700 | 2.63541600  |   |             |             |             |
| H | -3.12811200 | 3.61540200  | 1.84538600  |   |             |             |             |
| H | -3.59153600 | 5.98025700  | 1.34329500  |   |             |             |             |
| H | -2.85846200 | 6.97396300  | -0.81046000 |   |             |             |             |
| H | -1.63249300 | 5.56962900  | -2.45889200 |   |             |             |             |
| H | -1.13132400 | 3.21027900  | -1.94401600 |   |             |             |             |
| H | -4.42856400 | 1.00378000  | 1.35847000  |   |             |             |             |
| H | -5.31787600 | 0.73504500  | 3.65013000  |   |             |             |             |
| H | -3.78326200 | 0.81535400  | 5.59987200  |   |             |             |             |
| H | -1.35620600 | 1.21075000  | 5.24282700  |   |             |             |             |
| H | -0.47660100 | 1.50222700  | 2.94676400  |   |             |             |             |
| H | -3.30667800 | 1.96408700  | -2.36777700 |   |             |             |             |
| H | -2.12666500 | 0.57085900  | -4.11732300 |   |             |             |             |
| H | -1.04493000 | 0.54451900  | -2.71500400 |   |             |             |             |
| H | -1.49566900 | -1.81192600 | -2.45395100 |   |             |             |             |

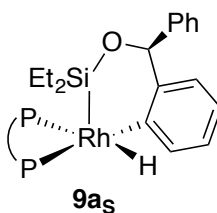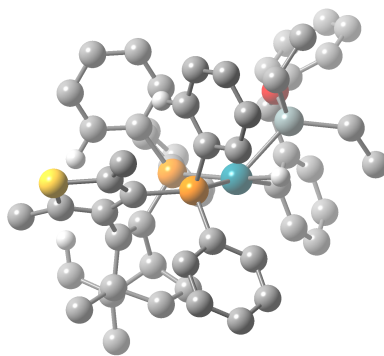

G = - 3761.934285 Hartree  
ZPE = - 3761.827970 Hartree

|    |            |             |             |   |             |             |             |
|----|------------|-------------|-------------|---|-------------|-------------|-------------|
| C  | 2.14123000 | 0.10368500  | -1.70211900 | C | 2.19629500  | 3.06478300  | -0.28292900 |
| C  | 3.41514800 | 0.31453100  | -1.14650400 | C | -0.11273500 | 0.71736100  | 2.31576500  |
| C  | 1.91790200 | 0.54756600  | -3.01530400 | C | -1.04695000 | 1.32046600  | 3.15958800  |
| C  | 4.39978500 | 0.98360200  | -1.88244400 | C | -1.29371600 | 0.79190200  | 4.42306300  |
| C  | 2.89111300 | 1.23442000  | -3.73412000 | C | -0.58497500 | -0.32259200 | 4.86386900  |
| H  | 0.95433800 | 0.35280400  | -3.49083300 | C | 0.38172300  | -0.90124700 | 4.04498200  |
| C  | 4.14118500 | 1.45653700  | -3.16264200 | C | 0.61308500  | -0.38972400 | 2.77183200  |
| H  | 5.38188100 | 1.14141600  | -1.43910100 | C | -1.19679100 | 2.24928100  | 0.02960400  |
| H  | 2.67872500 | 1.57940500  | -4.74486300 | C | -1.03662600 | 3.23972900  | -1.11251200 |
| H  | 4.91824500 | 1.97754800  | -3.71815100 | C | -2.31384800 | 4.09429800  | -0.96632200 |
| Si | 2.05258300 | -2.23037300 | -0.53537600 | C | -3.23377200 | 2.83866000  | -0.92627500 |
| C  | 3.68184000 | -0.16660100 | 0.27257100  | C | -2.51807500 | 1.98748600  | 0.13940400  |
| C  | 5.14125500 | -0.15525000 | 0.64766700  | C | -1.32765900 | 2.40305700  | -2.38725200 |
| C  | 5.69425800 | 0.96788300  | 1.26067200  | C | -2.84008500 | 2.13764100  | -2.26320900 |
| C  | 5.96337600 | -1.23809700 | 0.33926600  | C | -2.31054500 | 4.95891000  | 0.29138400  |
| C  | 7.05262700 | 1.01143300  | 1.55993200  | C | -2.56913700 | 5.03562500  | -2.14129100 |
| H  | 5.04851100 | 1.81701700  | 1.49533800  | C | -4.72600000 | 3.03964300  | -0.80907000 |
| C  | 7.31920000 | -1.19908200 | 0.64334600  | C | -3.23134300 | 0.97421400  | 0.93726700  |
| H  | 5.52197500 | -2.11402600 | -0.13552100 | C | -4.13768500 | 1.34622200  | 1.89942900  |
| C  | 7.86787100 | -0.07369200 | 1.25357900  | C | -4.12360100 | -1.12911900 | 1.49385900  |
| H  | 7.47467600 | 1.89238900  | 2.03950800  | C | -3.17536600 | -0.46537900 | 0.74123200  |
| H  | 7.95254500 | -2.05057700 | 0.40282000  | C | -4.39806300 | 2.68649200  | 2.49718300  |
| H  | 8.92875700 | -0.04480900 | 1.49294600  | C | -4.59103800 | -2.55097200 | 1.54343300  |
| C  | 2.97477600 | -3.15265300 | -1.90920400 | C | -2.86837500 | -1.48271700 | -1.92328900 |
| C  | 3.38796900 | -2.47849700 | -3.20738100 | C | -2.16453200 | -1.61269800 | -3.12588500 |
| H  | 2.31875100 | -4.01276900 | -2.12912000 | C | -2.84433300 | -1.68195200 | -4.33811900 |
| H  | 3.85825000 | -3.58511600 | -1.41173000 | C | -4.23328600 | -1.61378400 | -4.36488000 |
| H  | 3.86123300 | -3.18908200 | -3.89730400 | C | -4.94302700 | -1.48545000 | -3.17464500 |
| H  | 2.52314100 | -2.04348600 | -3.72341900 | C | -4.26606500 | -1.42003300 | -1.96201900 |
| H  | 4.09988000 | -1.66267300 | -3.03101200 | C | -1.86808000 | -2.97262000 | 0.38606000  |
| C  | 2.62193900 | -4.52215900 | 1.08389400  | C | -1.55241500 | -3.09525200 | 1.74277000  |
| H  | 2.27192000 | -5.25235400 | 1.82618200  | C | -1.46495700 | -4.34941200 | 2.33383000  |
| H  | 3.04421700 | -5.09312900 | 0.24768800  | C | -1.68039900 | -5.49689000 | 1.57430400  |
| H  | 3.44079600 | -3.94994300 | 1.53779700  | C | -1.97212800 | -5.38119800 | 0.21834600  |
| Rh | 0.38385500 | -0.58192200 | -0.83129200 | C | -2.06065600 | -4.12498900 | -0.37655500 |
| H  | 0.50636300 | -2.00391000 | -1.69191100 | P | 0.22665200  | 1.28253500  | 0.61089900  |
| O  | 3.14325500 | -1.44740200 | 0.49475500  | P | -1.92307600 | -1.29149100 | -0.34977200 |
| H  | 3.17062800 | 0.53985700  | 0.95762200  | S | -4.98132900 | -0.02568700 | 2.52720400  |
| H  | 1.02159800 | -3.13438300 | 1.50416100  | H | 1.44553200  | 2.59153900  | 2.99971200  |
| C  | 1.48803600 | -3.60534600 | 0.62922100  | H | 3.27224200  | 4.23013300  | 3.24541100  |
| H  | 0.69534100 | -4.18949500 | 0.14031300  | H | 4.43631000  | 5.11638000  | 1.23782500  |
| C  | 1.53477700 | 2.55764400  | 0.84277000  | H | 3.74389900  | 4.34792600  | -1.02744400 |
| C  | 1.93524000 | 2.98708600  | 2.11189800  | H | 1.92416000  | 2.71691700  | -1.27871100 |
| C  | 2.97056700 | 3.90683900  | 2.25157600  | H | -1.58871300 | 2.20137700  | 2.82037800  |
| C  | 3.62135200 | 4.40458000  | 1.12644100  | H | -2.04040200 | 1.25455800  | 5.06603100  |
| C  | 3.22982800 | 3.98335700  | -0.14072700 | H | -0.78095600 | -0.73527800 | 5.85110200  |
|    |            |             |             | H | 0.94722300  | -1.76645500 | 4.38606400  |
|    |            |             |             | H | 1.35211800  | -0.85755800 | 2.11732400  |

|   |             |             |             |
|---|-------------|-------------|-------------|
| H | -0.09646600 | 3.80208000  | -1.12920500 |
| H | -1.07412200 | 2.95939900  | -3.29799700 |
| H | -0.73489600 | 1.47759600  | -2.39271400 |
| H | -3.09978300 | 1.07274000  | -2.24059800 |
| H | -3.40501900 | 2.57452000  | -3.09723700 |
| H | -1.59257600 | 5.78041900  | 0.17145600  |
| H | -2.02315400 | 4.40824200  | 1.19226700  |
| H | -3.29544300 | 5.41718200  | 0.45837800  |
| H | -3.49528000 | 5.60293300  | -1.97912000 |
| H | -2.65288700 | 4.53746600  | -3.11087200 |
| H | -1.75230100 | 5.76557300  | -2.21544500 |
| H | -5.24752600 | 2.07327700  | -0.77750000 |
| H | -5.09999900 | 3.58612200  | -1.68437000 |
| H | -5.01580900 | 3.60450600  | 0.08399900  |
| H | -3.81838300 | 3.46178300  | 1.98832500  |
| H | -4.11129300 | 2.70367700  | 3.55804900  |
| H | -5.45808500 | 2.96513700  | 2.44527900  |
| H | -4.44975900 | -3.05994100 | 0.58632600  |
| H | -5.65949200 | -2.58312200 | 1.78495700  |
| H | -4.05900400 | -3.14118100 | 2.29920100  |
| H | -1.07463800 | -1.64172700 | -3.09971000 |
| H | -2.28383800 | -1.77852000 | -5.26521700 |
| H | -4.76345800 | -1.65528300 | -5.31378000 |
| H | -6.02900700 | -1.42662600 | -3.19007500 |
| H | -4.82722900 | -1.28367600 | -1.03872600 |
| H | -1.38411300 | -2.20262000 | 2.34816900  |
| H | -1.21903900 | -4.42806900 | 3.39126100  |
| H | -1.61321300 | -6.47920400 | 2.03613700  |
| H | -2.13534900 | -6.27342800 | -0.38199900 |
| H | -2.29674500 | -4.04240400 | -1.43720600 |

G = -2737.931711 Hartree  
ZPE = - 2737.849704 Hartree

|    |             |             |             |
|----|-------------|-------------|-------------|
| C  | 3.27576100  | -1.16212200 | -1.21082600 |
| C  | 4.33548300  | -1.19267900 | -0.29843200 |
| C  | 5.64834100  | -1.24442900 | -0.74999300 |
| C  | 5.91410100  | -1.26433300 | -2.11763000 |
| C  | 4.86471200  | -1.23809900 | -3.02943400 |
| C  | 3.54871900  | -1.18786900 | -2.57727200 |
| C  | 1.44664800  | -2.08130300 | 0.80466300  |
| C  | 1.76101200  | -1.72713800 | 2.11801600  |
| C  | 1.64175200  | -2.65703900 | 3.14683900  |
| C  | 1.22335600  | -3.95441500 | 2.87154400  |
| C  | 0.92169900  | -4.32111400 | 1.56243300  |
| C  | 1.02543200  | -3.38921700 | 0.53657700  |
| C  | 1.65724400  | 0.75633500  | 0.05011800  |
| C  | 2.43656600  | 1.83867800  | -0.67751100 |
| C  | 2.67015200  | 2.86098300  | 0.45599900  |
| C  | 1.15962600  | 2.88247500  | 0.84433500  |
| C  | 0.86388700  | 1.37647400  | 0.95422800  |
| C  | 1.37978200  | 2.54854700  | -1.56540900 |
| C  | 0.51124600  | 3.27451600  | -0.52057800 |
| C  | 3.62680300  | 2.35274600  | 1.53126900  |
| C  | 3.22428100  | 4.20352300  | -0.01482400 |
| C  | 0.72029500  | 3.78884700  | 1.96994000  |
| C  | -0.22823300 | 0.80178700  | 1.76485100  |
| C  | -0.18199000 | 0.79911600  | 3.13792700  |
| C  | -2.31018800 | -0.19040200 | 2.24681500  |
| C  | -1.45094400 | 0.20552100  | 1.24755900  |
| C  | 0.92068300  | 1.20356800  | 4.05622200  |
| C  | -3.70133100 | -0.74156400 | 2.22308600  |
| C  | -2.60763000 | 1.58890500  | -0.97536200 |
| C  | -2.60897800 | 1.97648700  | -2.31876900 |
| C  | -3.19636300 | 3.17443100  | -2.70893900 |
| C  | -3.77531500 | 4.00638600  | -1.75456700 |
| C  | -3.77453400 | 3.63208200  | -0.41371300 |
| C  | -3.19687200 | 2.42741600  | -0.02516400 |
| C  | -3.08961800 | -1.23668400 | -0.69501800 |
| C  | -2.75058500 | -2.56663900 | -0.40526200 |
| C  | -3.69550200 | -3.57745400 | -0.53609900 |
| C  | -4.98172000 | -3.27861700 | -0.98013700 |
| C  | -5.31619200 | -1.96587000 | -1.29665900 |
| C  | -4.37603700 | -0.94889000 | -1.15718900 |
| P  | 1.55017500  | -0.92734000 | -0.62115100 |
| P  | -1.74940000 | 0.01572700  | -0.55899700 |
| S  | -1.61226400 | 0.09756600  | 3.81328500  |
| Rh | -0.16195200 | -1.07097900 | -1.95570400 |

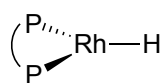

6

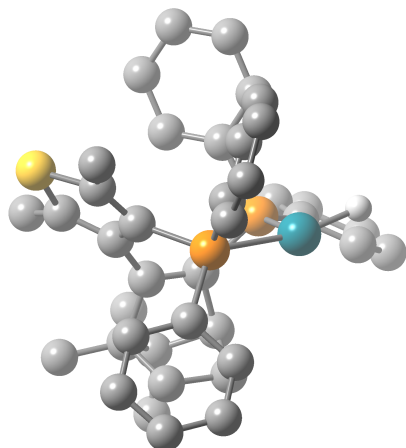

|   |             |             |             |
|---|-------------|-------------|-------------|
| H | 4.13111500  | -1.17888500 | 0.77198800  |
| H | 6.46727900  | -1.27098200 | -0.03433200 |
| H | 6.94241200  | -1.30343700 | -2.47052900 |
| H | 5.06912500  | -1.25759400 | -4.09765000 |
| H | 2.71160000  | -1.17072300 | -3.27493600 |
| H | 2.08687300  | -0.71300000 | 2.34028400  |
| H | 1.87895000  | -2.36609600 | 4.16852800  |
| H | 1.12898400  | -4.67975100 | 3.67662300  |
| H | 0.59762300  | -5.33555100 | 1.34038300  |
| H | 0.76810500  | -3.65761500 | -0.48885000 |
| H | 3.33493300  | 1.50475000  | -1.21099300 |
| H | 1.85625800  | 3.24800100  | -2.26262400 |
| H | 0.81518000  | 1.81494500  | -2.15776700 |
| H | -0.54534200 | 2.98828700  | -0.54984500 |
| H | 0.53812000  | 4.36502000  | -0.64739400 |
| H | 4.63841900  | 2.26537000  | 1.11222100  |
| H | 3.35451700  | 1.36832100  | 1.92237400  |
| H | 3.68510300  | 3.05645400  | 2.37326400  |
| H | 3.31655600  | 4.89488100  | 0.83342600  |
| H | 2.62181400  | 4.69819600  | -0.78087700 |
| H | 4.23149100  | 4.06336500  | -0.42900700 |
| H | -0.35109800 | 3.66175900  | 2.17622500  |
| H | 0.87874100  | 4.83897200  | 1.69322800  |
| H | 1.26491900  | 3.60876400  | 2.90418400  |
| H | 1.80856300  | 1.49765100  | 3.48918900  |
| H | 1.20789300  | 0.37361500  | 4.71552000  |
| H | 0.63698800  | 2.04570500  | 4.70037200  |
| H | -4.34859100 | -0.16383500 | 1.55410200  |
| H | -4.14278300 | -0.70637700 | 3.22462900  |
| H | -3.73289000 | -1.78157500 | 1.87754100  |
| H | -2.12116900 | 1.33513000  | -3.05493100 |
| H | -3.18875500 | 3.46710600  | -3.75642900 |
| H | -4.22154100 | 4.95163000  | -2.05547600 |
| H | -4.22143300 | 4.28403900  | 0.33376500  |
| H | -3.17707100 | 2.14553100  | 1.02760600  |
| H | -1.74287500 | -2.79628100 | -0.05551900 |
| H | -3.42590900 | -4.60318800 | -0.29437900 |
| H | -5.72044900 | -4.06985000 | -1.08622100 |
| H | -6.31761100 | -1.72907000 | -1.64979300 |
| H | -4.65074300 | 0.07884600  | -1.39183800 |
| H | 0.79585900  | -2.10297400 | -2.75152500 |

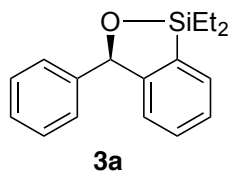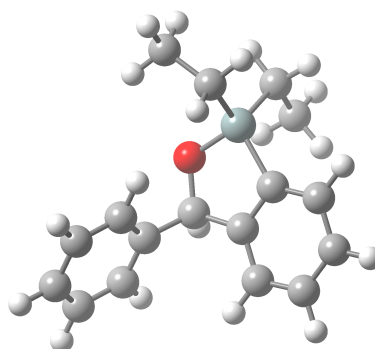

G = -1024.001264 Hartree

ZPE = - 1023.948326 Hartree

|    |             |             |             |
|----|-------------|-------------|-------------|
| C  | 0.12345400  | 3.51896500  | -0.64987300 |
| C  | -0.51089100 | 2.52070800  | 0.07818300  |
| C  | 0.08422700  | 1.26564300  | 0.17595000  |
| C  | 1.30276000  | 0.99817900  | -0.46070400 |
| C  | 1.92708500  | 2.01273200  | -1.18892100 |
| C  | 1.34212400  | 3.26944600  | -1.28158700 |
| H  | -0.33469400 | 4.50233400  | -0.73028900 |
| H  | -1.46788400 | 2.71387900  | 0.56245700  |
| H  | 2.87747000  | 1.82523000  | -1.68824000 |
| H  | 1.83050900  | 4.05950500  | -1.84748300 |
| O  | 0.33557100  | -1.01765700 | 0.84434100  |
| C  | -1.91563300 | -0.21512100 | 0.54014500  |
| C  | -2.14345800 | -0.94464400 | -0.62651700 |
| C  | -3.00437200 | 0.23891100  | 1.27913300  |
| C  | -3.43965100 | -1.21361400 | -1.04456400 |
| H  | -1.29276900 | -1.31316500 | -1.19910700 |
| C  | -4.30532200 | -0.02310400 | 0.85895400  |
| H  | -2.82934000 | 0.79390700  | 2.20113600  |
| C  | -4.52493200 | -0.75124600 | -0.30378800 |
| H  | -3.60719200 | -1.78809800 | -1.95284400 |
| H  | -5.14738600 | 0.33277700  | 1.44816500  |
| H  | -5.53968800 | -0.96499000 | -0.63111100 |
| Si | 1.72100800  | -0.77685900 | -0.07305600 |
| C  | 1.72828000  | -1.96261900 | -1.52663700 |
| H  | 2.68884200  | -1.87954900 | -2.05578400 |
| H  | 0.96001600  | -1.63533300 | -2.24186100 |
| C  | 1.47503300  | -3.40662900 | -1.09432500 |
| H  | 1.47463600  | -4.09766900 | -1.94492400 |
| H  | 2.24142400  | -3.75772800 | -0.39172700 |
| H  | 0.50680400  | -3.49997200 | -0.58803900 |
| C  | 3.24274900  | -0.99560100 | 1.00049200  |
| H  | 4.13494000  | -0.76753300 | 0.39813900  |
| H  | 3.33180000  | -2.05692500 | 1.27391300  |

|   |             |             |            |
|---|-------------|-------------|------------|
| C | 3.19380100  | -0.12129700 | 2.25101800 |
| H | 4.07172900  | -0.26223500 | 2.89149500 |
| H | 3.14354300  | 0.94320800  | 1.98955700 |
| H | 2.30521500  | -0.34981500 | 2.85223700 |
| C | -0.50662400 | 0.11159600  | 0.97359500 |
| H | -0.53843800 | 0.40562300  | 2.03903400 |

## References

- (1) Giordano, G.; Crabtree, R. H.; Heintz, R. M.; Forster, D.; Morris, D. E. In *Inorganic Syntheses*; Inorganic Syntheses; John Wiley & Sons, Inc.: Hoboken, NJ, USA, 1990; Vol. 28, pp 88–90.
- (2) Edelmann, F. T. *Inorg. Chim. Acta* **2004**, *357*, 4592.
- (3) Inamoto, K.; Saito, T.; Hiroya, K.; Doi, T. *J. Org. Chem.* **2010**, *75*, 3900.
- (4) Lee, T.; Wilson, T. W.; Berg, R.; Ryberg, P.; Hartwig, J. F. *J. Am. Chem. Soc.* **2015**, *137*, 6742.
- (5) Su, B.; Zhou, T.-G.; Li, X.-W.; Shao, X.-R.; Xu, P.-L.; Wu, W.-L.; Hartwig, J. F.; Shi, Z.-J. *Angew. Chem. Int. Ed.* **2016**, *56*, 1092.
- (6) Frisch, M. J.; Trucks, G. W.; Schlegel, H. B.; Scuseria, G. E.; Robb, M. A.; Cheeseman, J. R.; Scalmani, G.; Barone, V.; Mennucci, B.; Petersson, G. A.; Nakatsuji, H.; Caricato, M.; Li, X.; Hratchian, H. P.; Izmaylov, A. F.; Bloino, J.; Zheng, G.; Sonnenberg, J. L.; Hada, M.; Ehara, M.; Toyota, K.; Fukuda, R.; Hasegawa, J.; Ishida, M.; Nakajima, T.; Honda, Y.; Kitao, O.; Nakai, H.; Vreven, T.; Montgomery, J. A., Jr.; Peralta, J. E.; Ogliaro, F.; Bearpark, M.; Heyd, J. J.; Brothers, E.; Kudin, K. N.; Staroverov, V. N.; Kobayashi, R.; Normand, J.; Raghavachari, K.; Rendell, A.; Burant, J. C.; Iyengar, S. S.; Tomasi, J.; Cossi, M.; Rega, N.; Millam, J. M.; Klene, M.; Knox, J. E.; Cross, J. B.; Bakken, V.; Adamo, C.; Jaramillo, J.; Gomperts, R.; Stratmann, R. E.; Yazyev, O.; Austin, A. J.; Cammi, R.; Pomelli, C.; Ochterski, J. W.; Martin, R. L.; Morokuma, K.; Zakrzewski, V. G.; Voth, G. A.; Salvador, P.; Dannenberg, J. J.; Dapprich, S.; Daniels, A. D.; Farkas, Ö.; Foresman, J. B.; Ortiz, J. V.; Cioslowski, J.; Fox, D. J. Gaussian 09, Revision D.01; Gaussian, Inc., Wallingford CT, **2009**.
- (7) Hay, P. J.; Wadt, W. R. *J. Chem. Phys.* **1985**, *82*, 270.
- (8) Hay, P. J.; Wadt, W. R. *J. Chem. Phys.* **1985**, *82*, 299.
- (9) Ditchfield, R.; Hehre, W. J.; Pople, J. A. *J. Chem. Phys.* **1971**, *54*, 724.
- (10) Hehre, W. J.; Ditchfield, R.; Pople, J. A. *J. Chem. Phys.* **1972**, *56*, 2257.
- (11) Hariharan, P. C.; Pople, J. A. *Theoretica Chimica Acta* **1973**, *28*, 213.
- (12) Becke, A. D. *J. Chem. Phys.* **1993**, *98*, 5648.
- (13) Lee, C.; Yang, W.; Parr, R. *Phys. Rev., B Condens. Matter Mater. Phys.* **1988**, *37*, 785.

- (14) Roy, L. E.; Hay, P. J.; Martin, R. L. *J. Chem. Theory Comput.* **2008**, *4*, 1029.
- (15) Krishnan, R.; Binkley, J. S.; Seeger, R.; Pople, J. A. *J. Chem. Phys.* **1980**, *72*, 650.
- (16) Zhao, Y.; Truhlar, D. G. *Theor. Chem. Acc.* **2008**, *120*, 215.
- (17) Marenich, A. V.; Cramer, C. J.; Truhlar, D. G. *J. Phys. Chem. B* **2009**, *113*, 6378.
